# Supplementary material
Source: publisher figshare collection journal article supplement (https://tandf.figshare.com/articles/dataset/_/5427250)

q curves for N=15, FAR=0.05

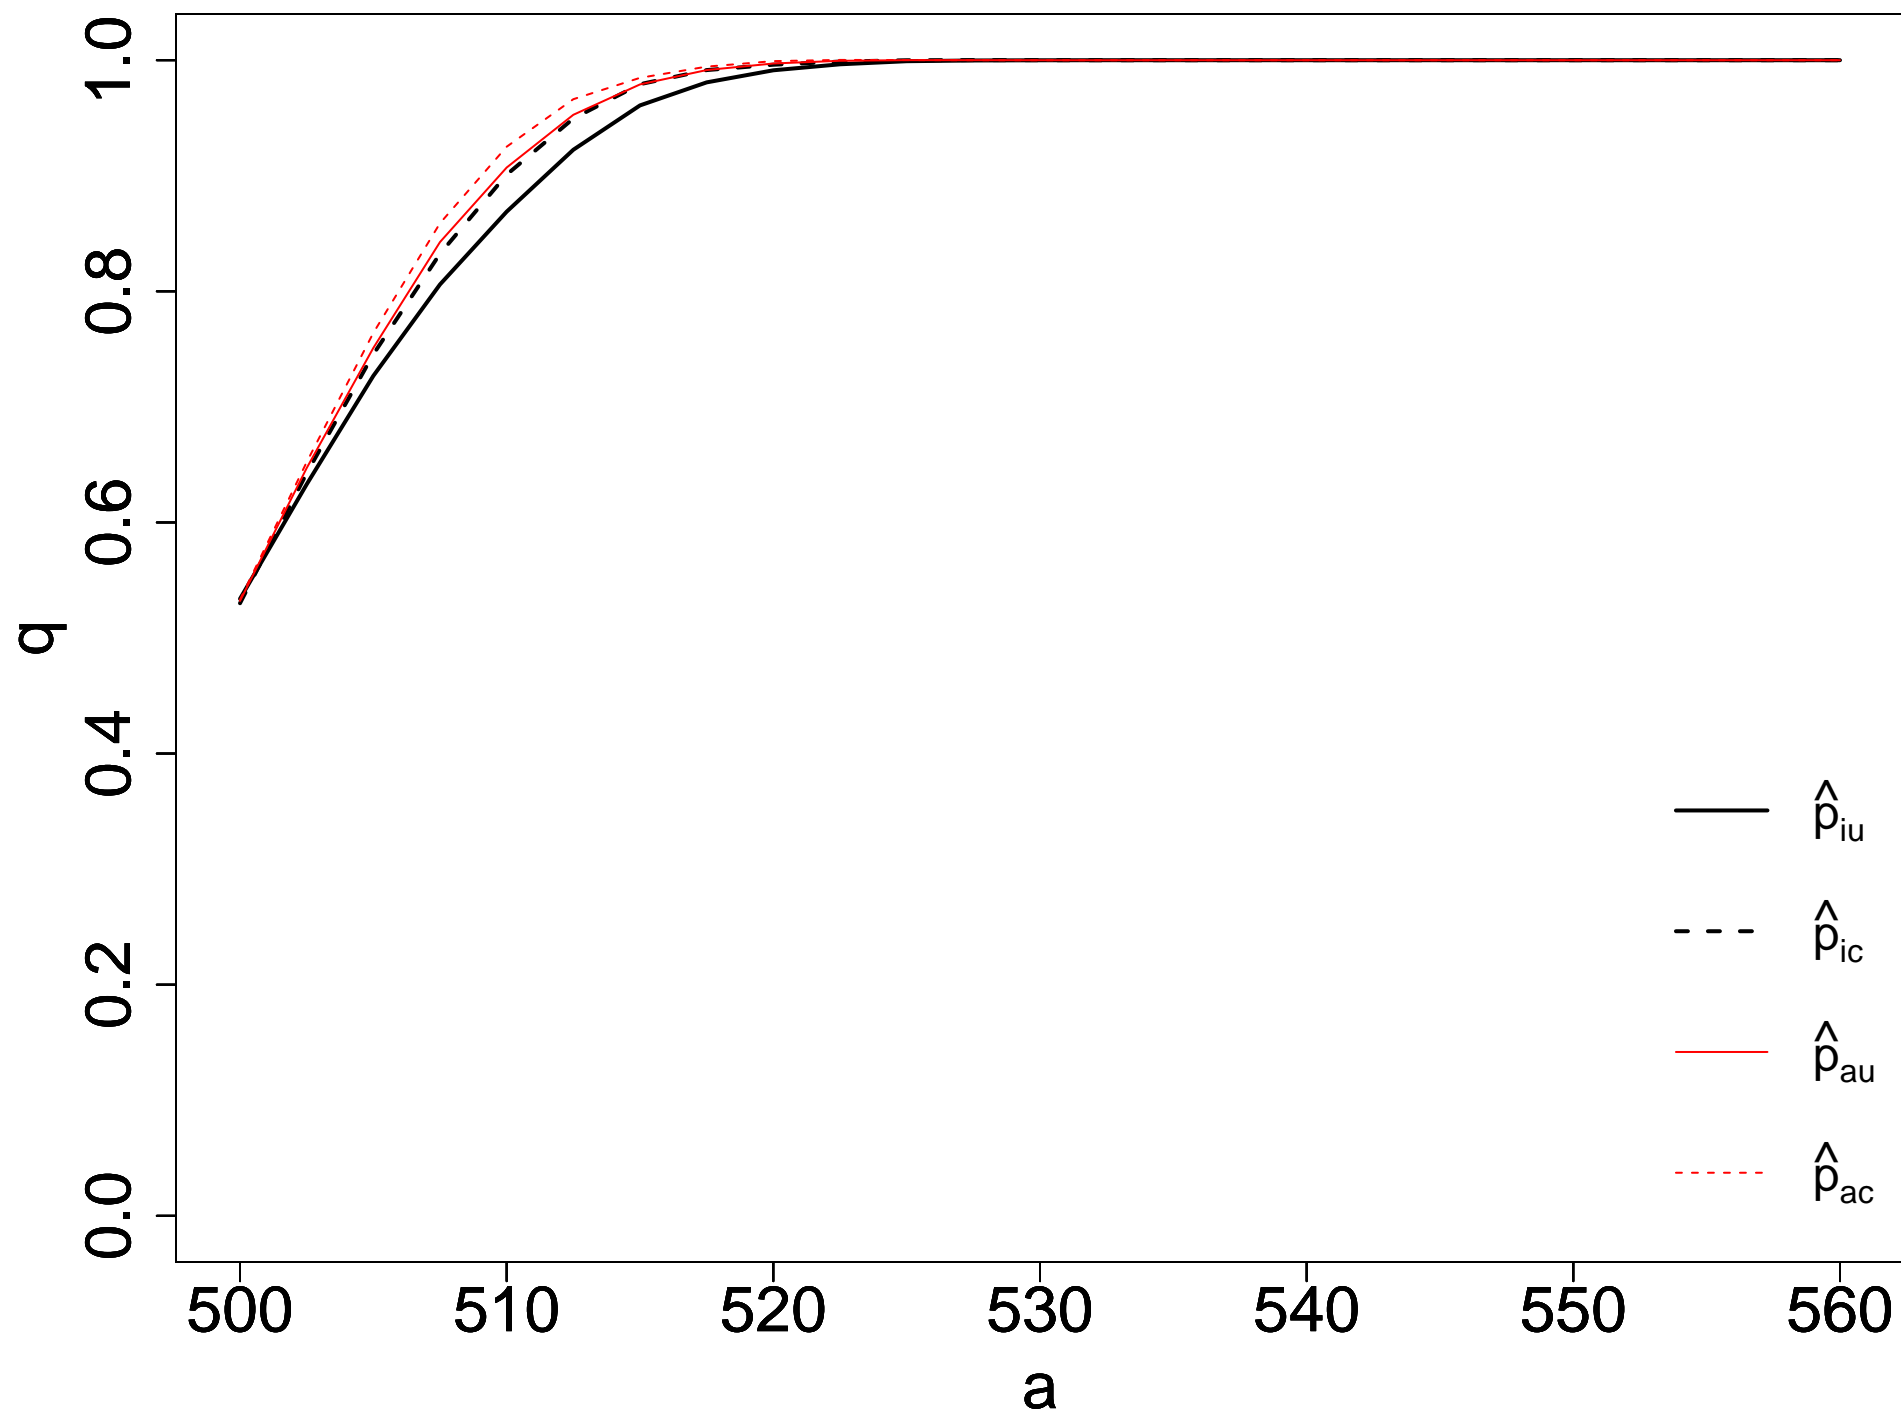

Supplement: Supplementary file 1 [file 1]

q curves for N=30, FAR=0.05

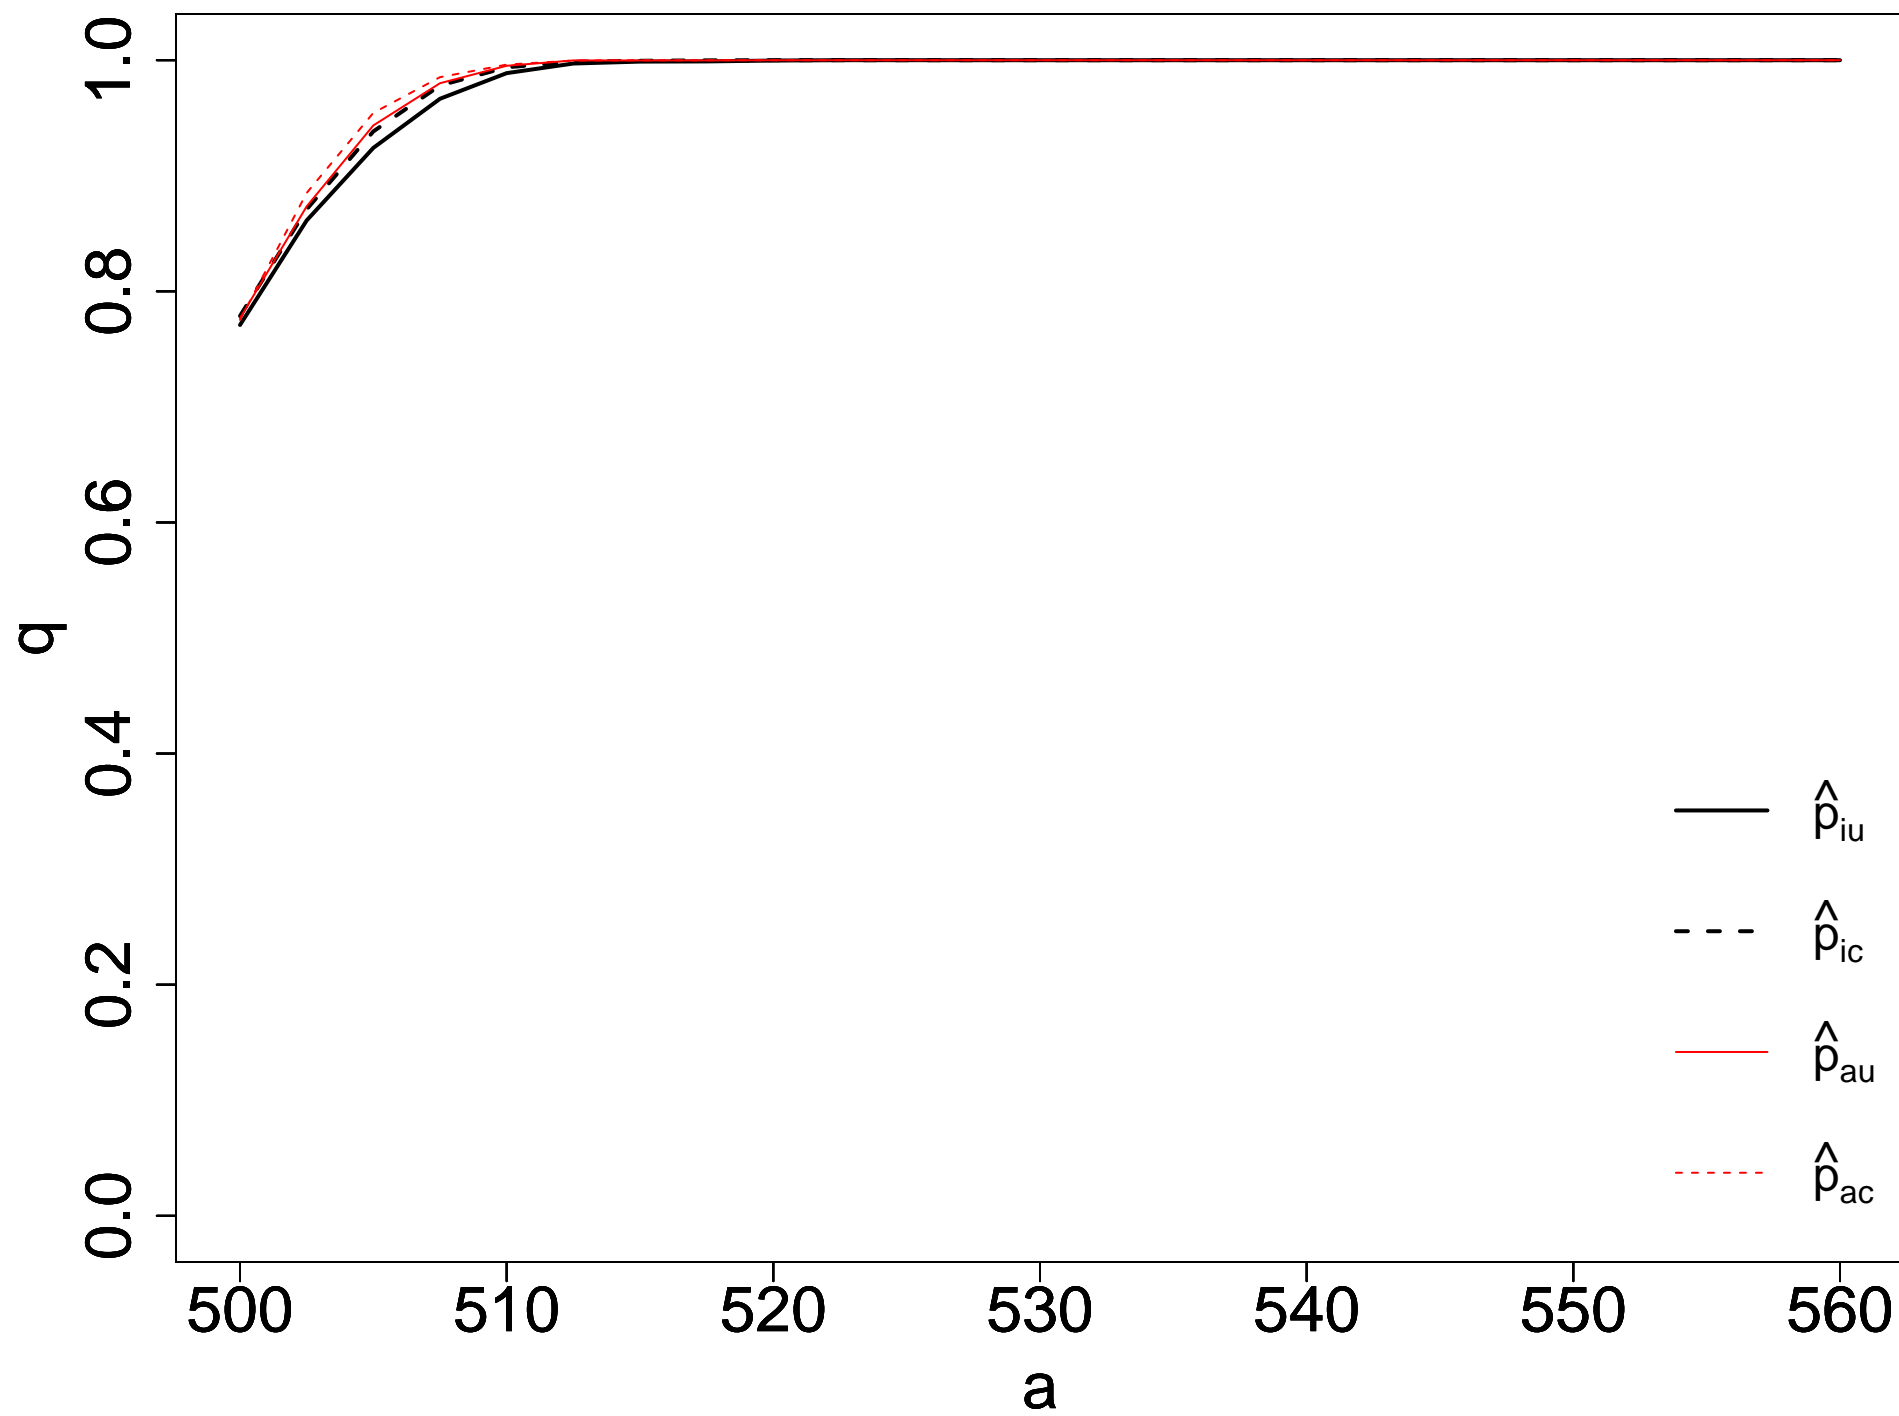

Supplement: Supplementary file 2 [file 1]

q curves for N=25, FAR=0.001

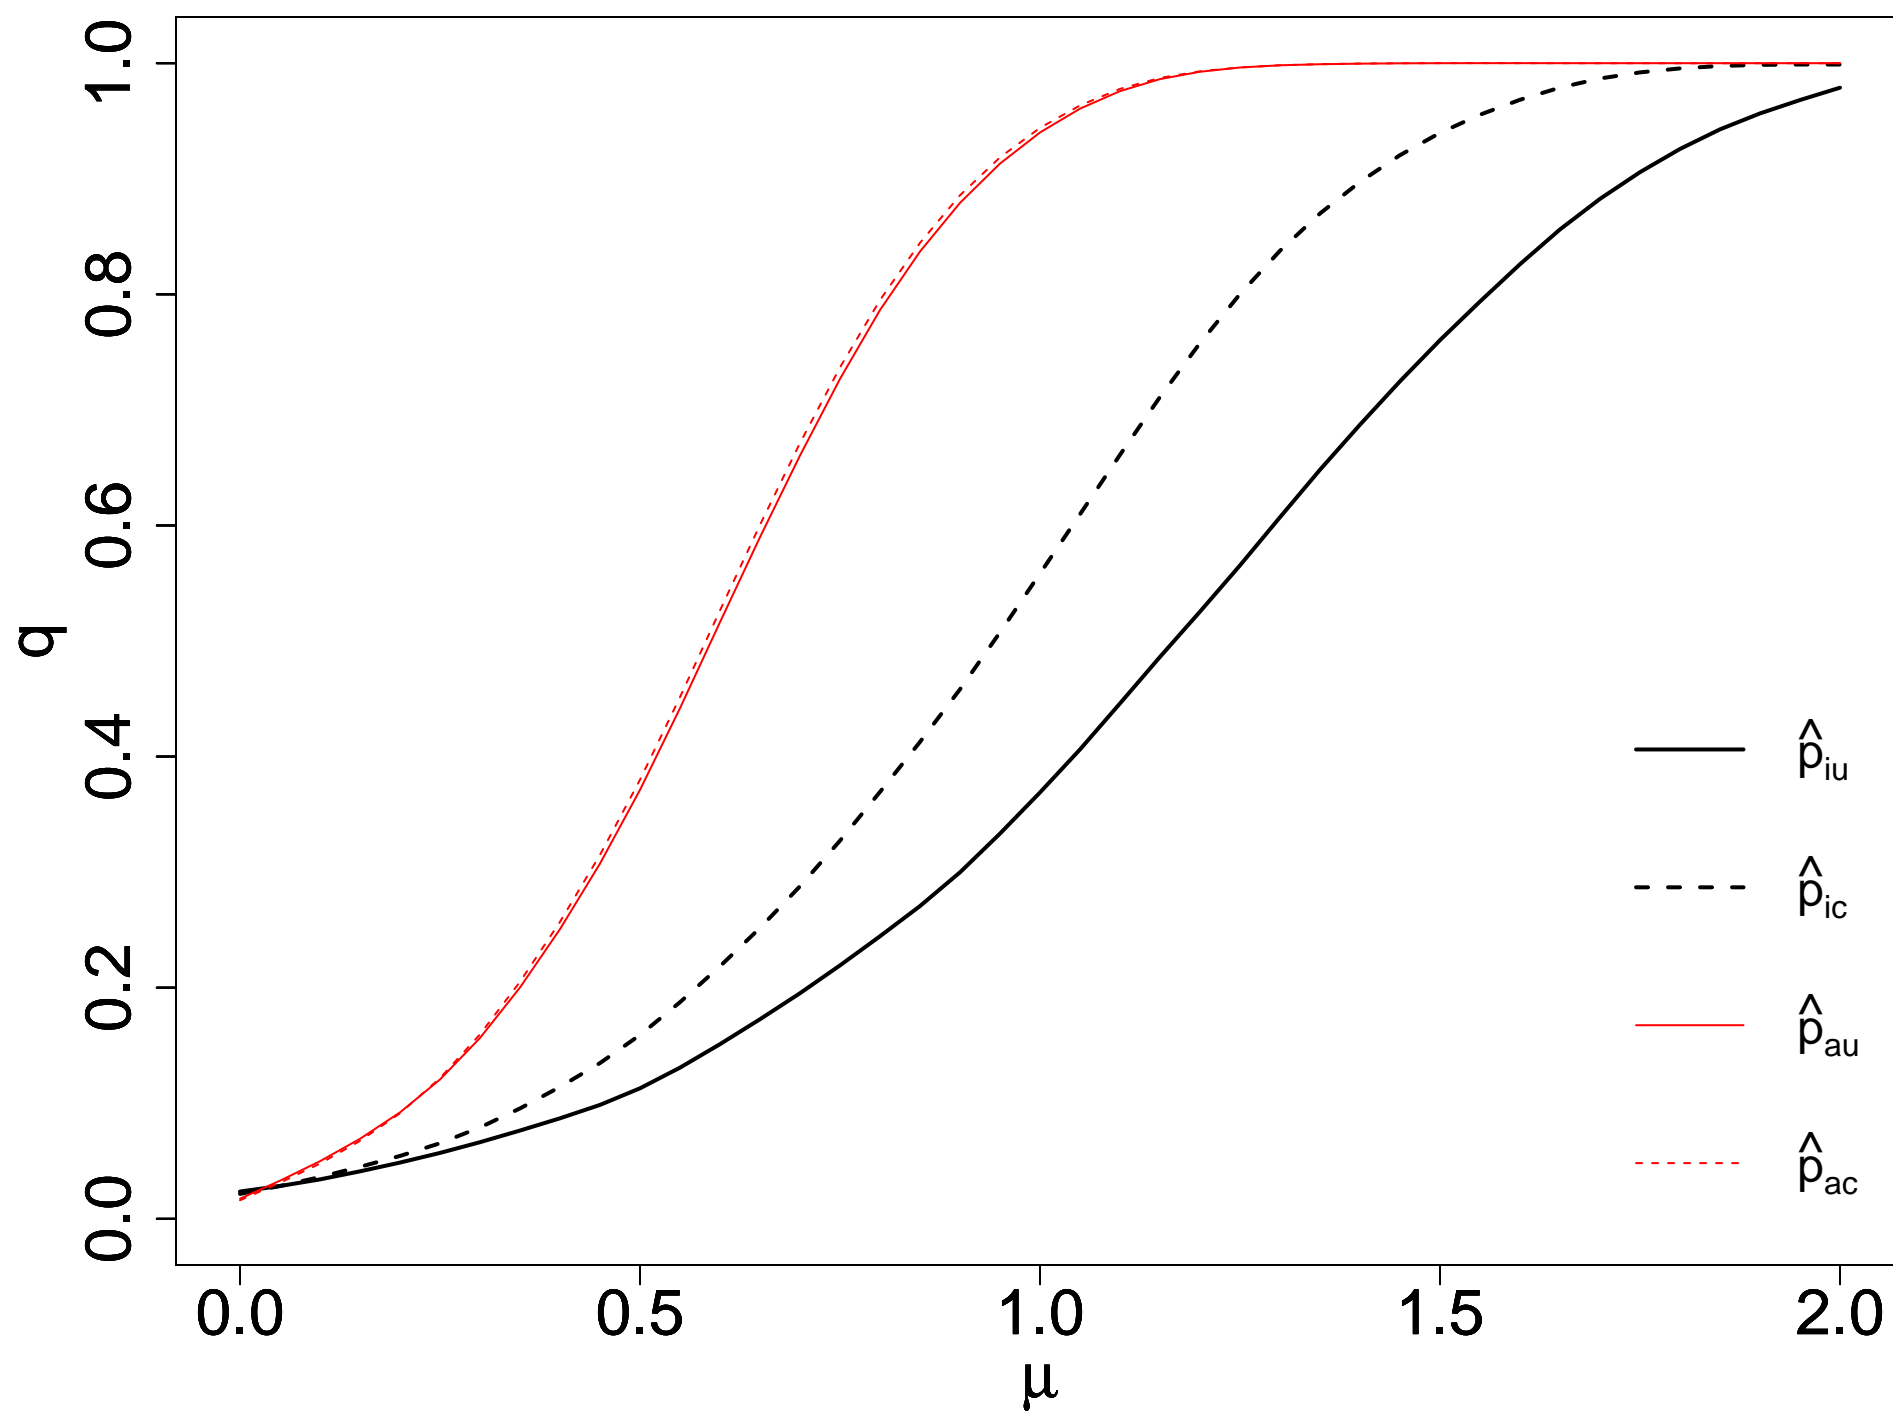

Supplement: Supplementary file 3 [file 1]

TARL curves for N=25, FAR=0.001

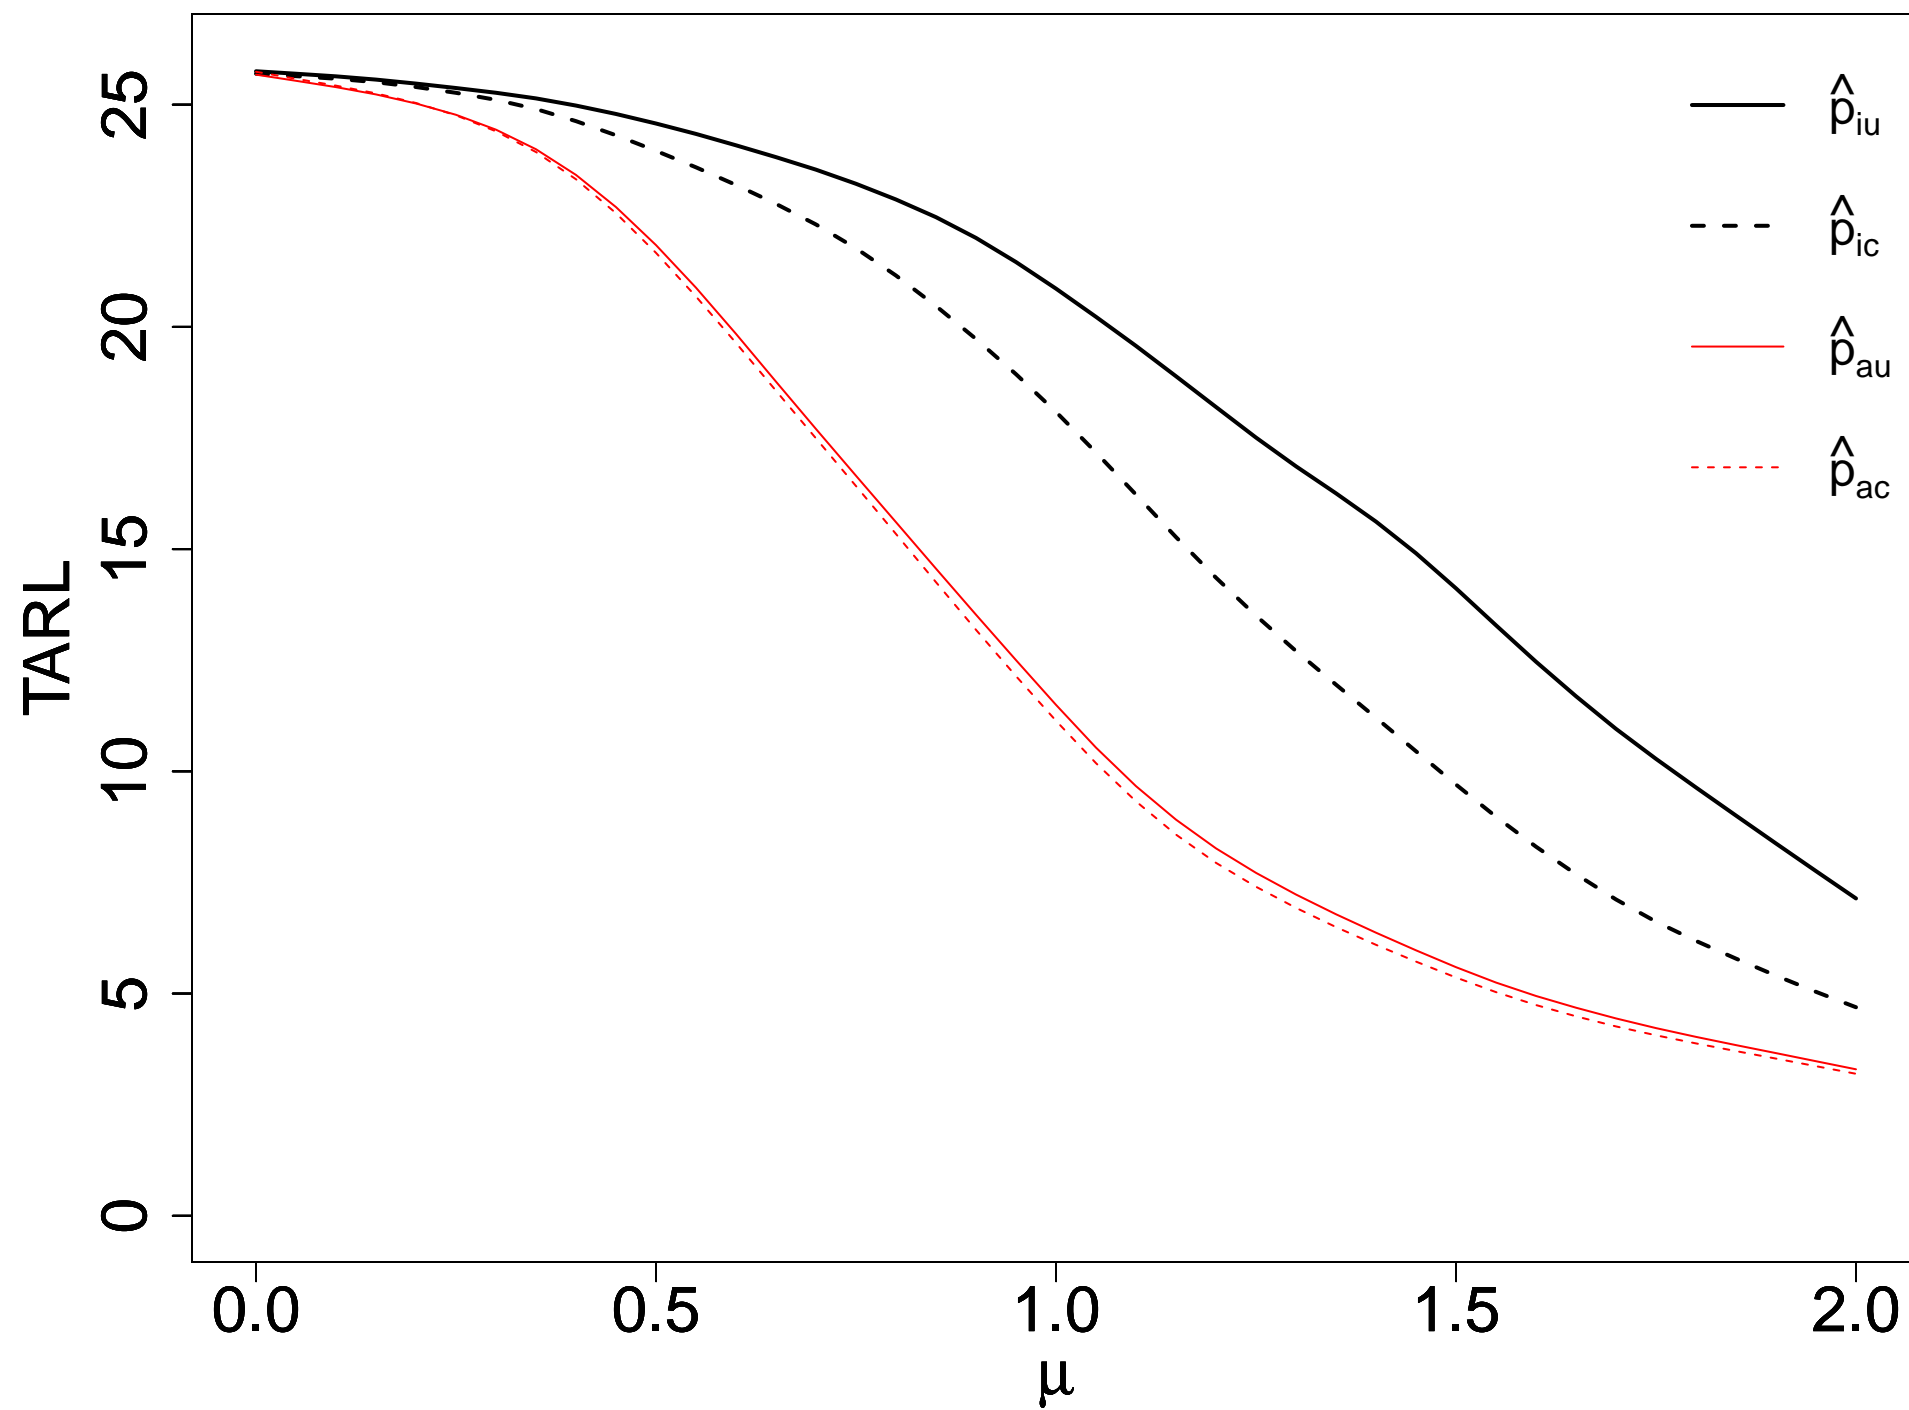

Supplement: Supplementary file 4 [file 1]

TARL curves for N=30, FAR=0.001

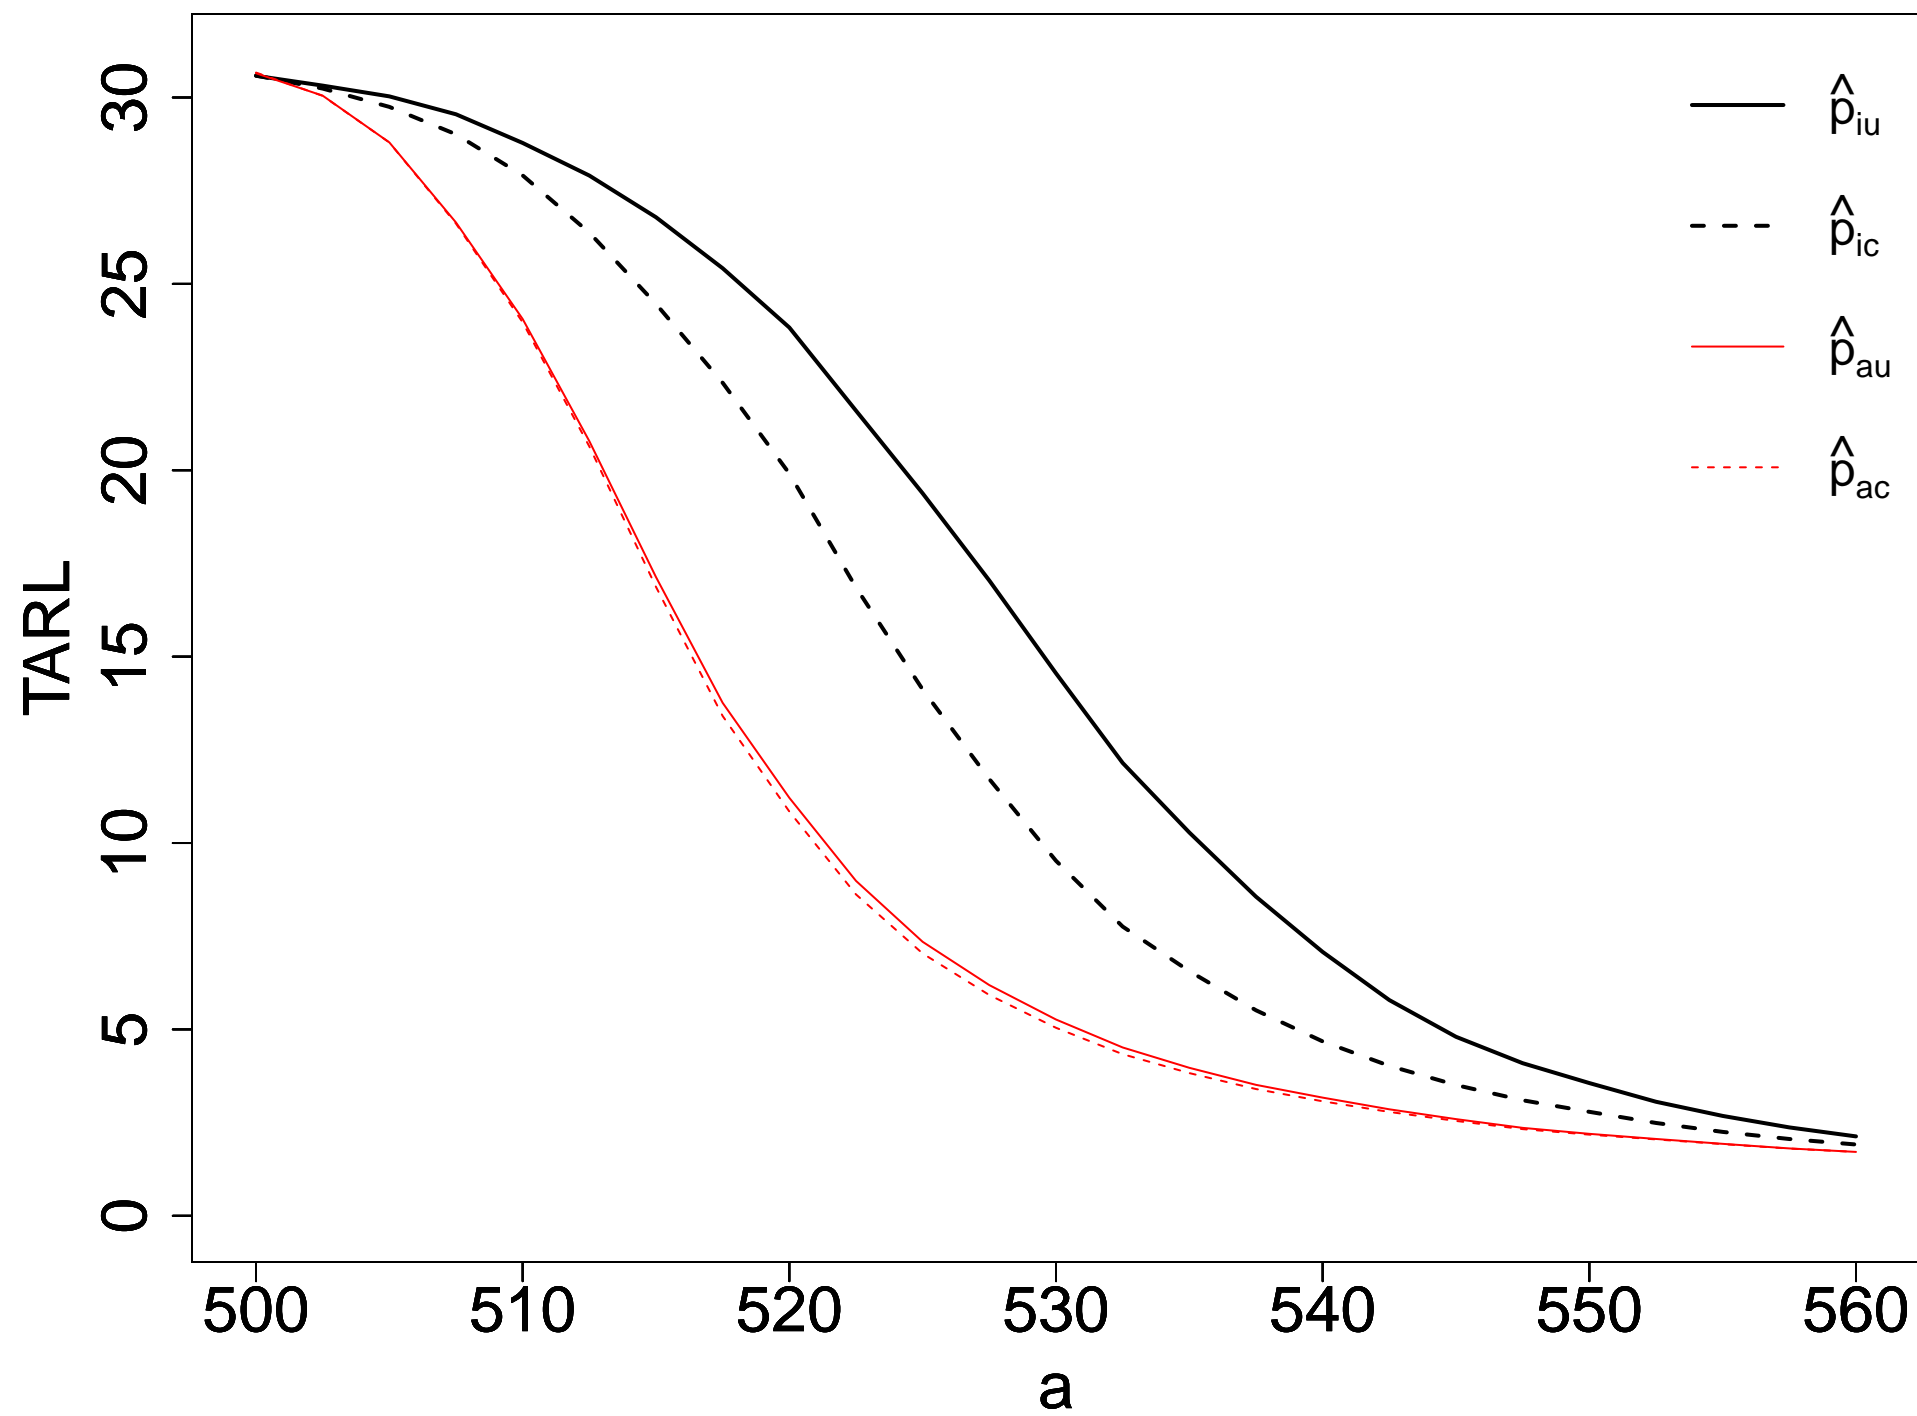

Supplement: Supplementary file 5 [file 1]

q curves for N=25, FAR=0.001

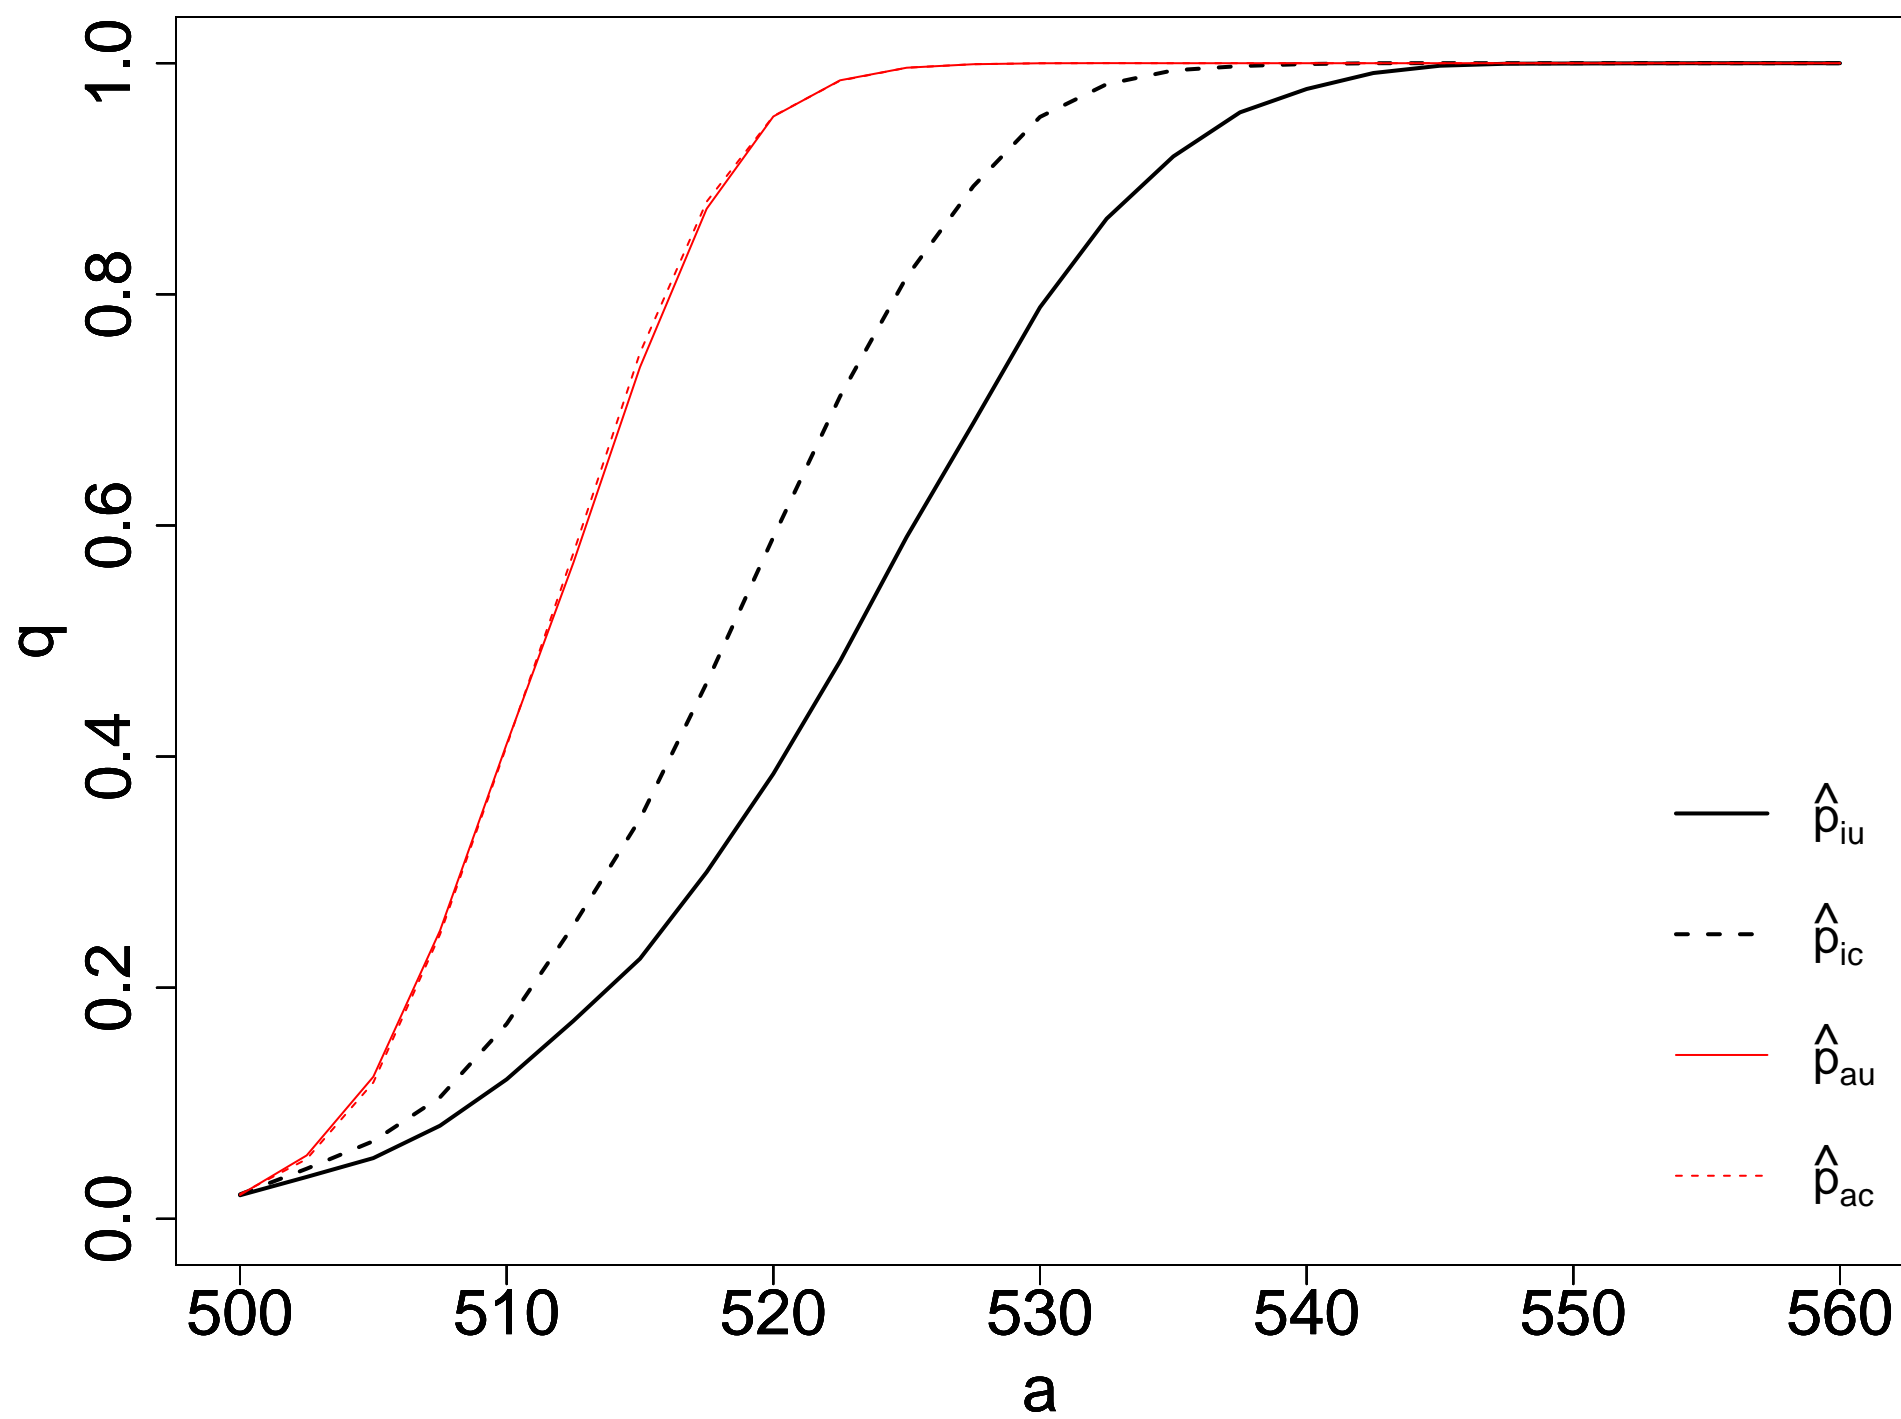

Supplement: Supplementary file 6 [file 1]

q curves for N=30, FAR=0.05

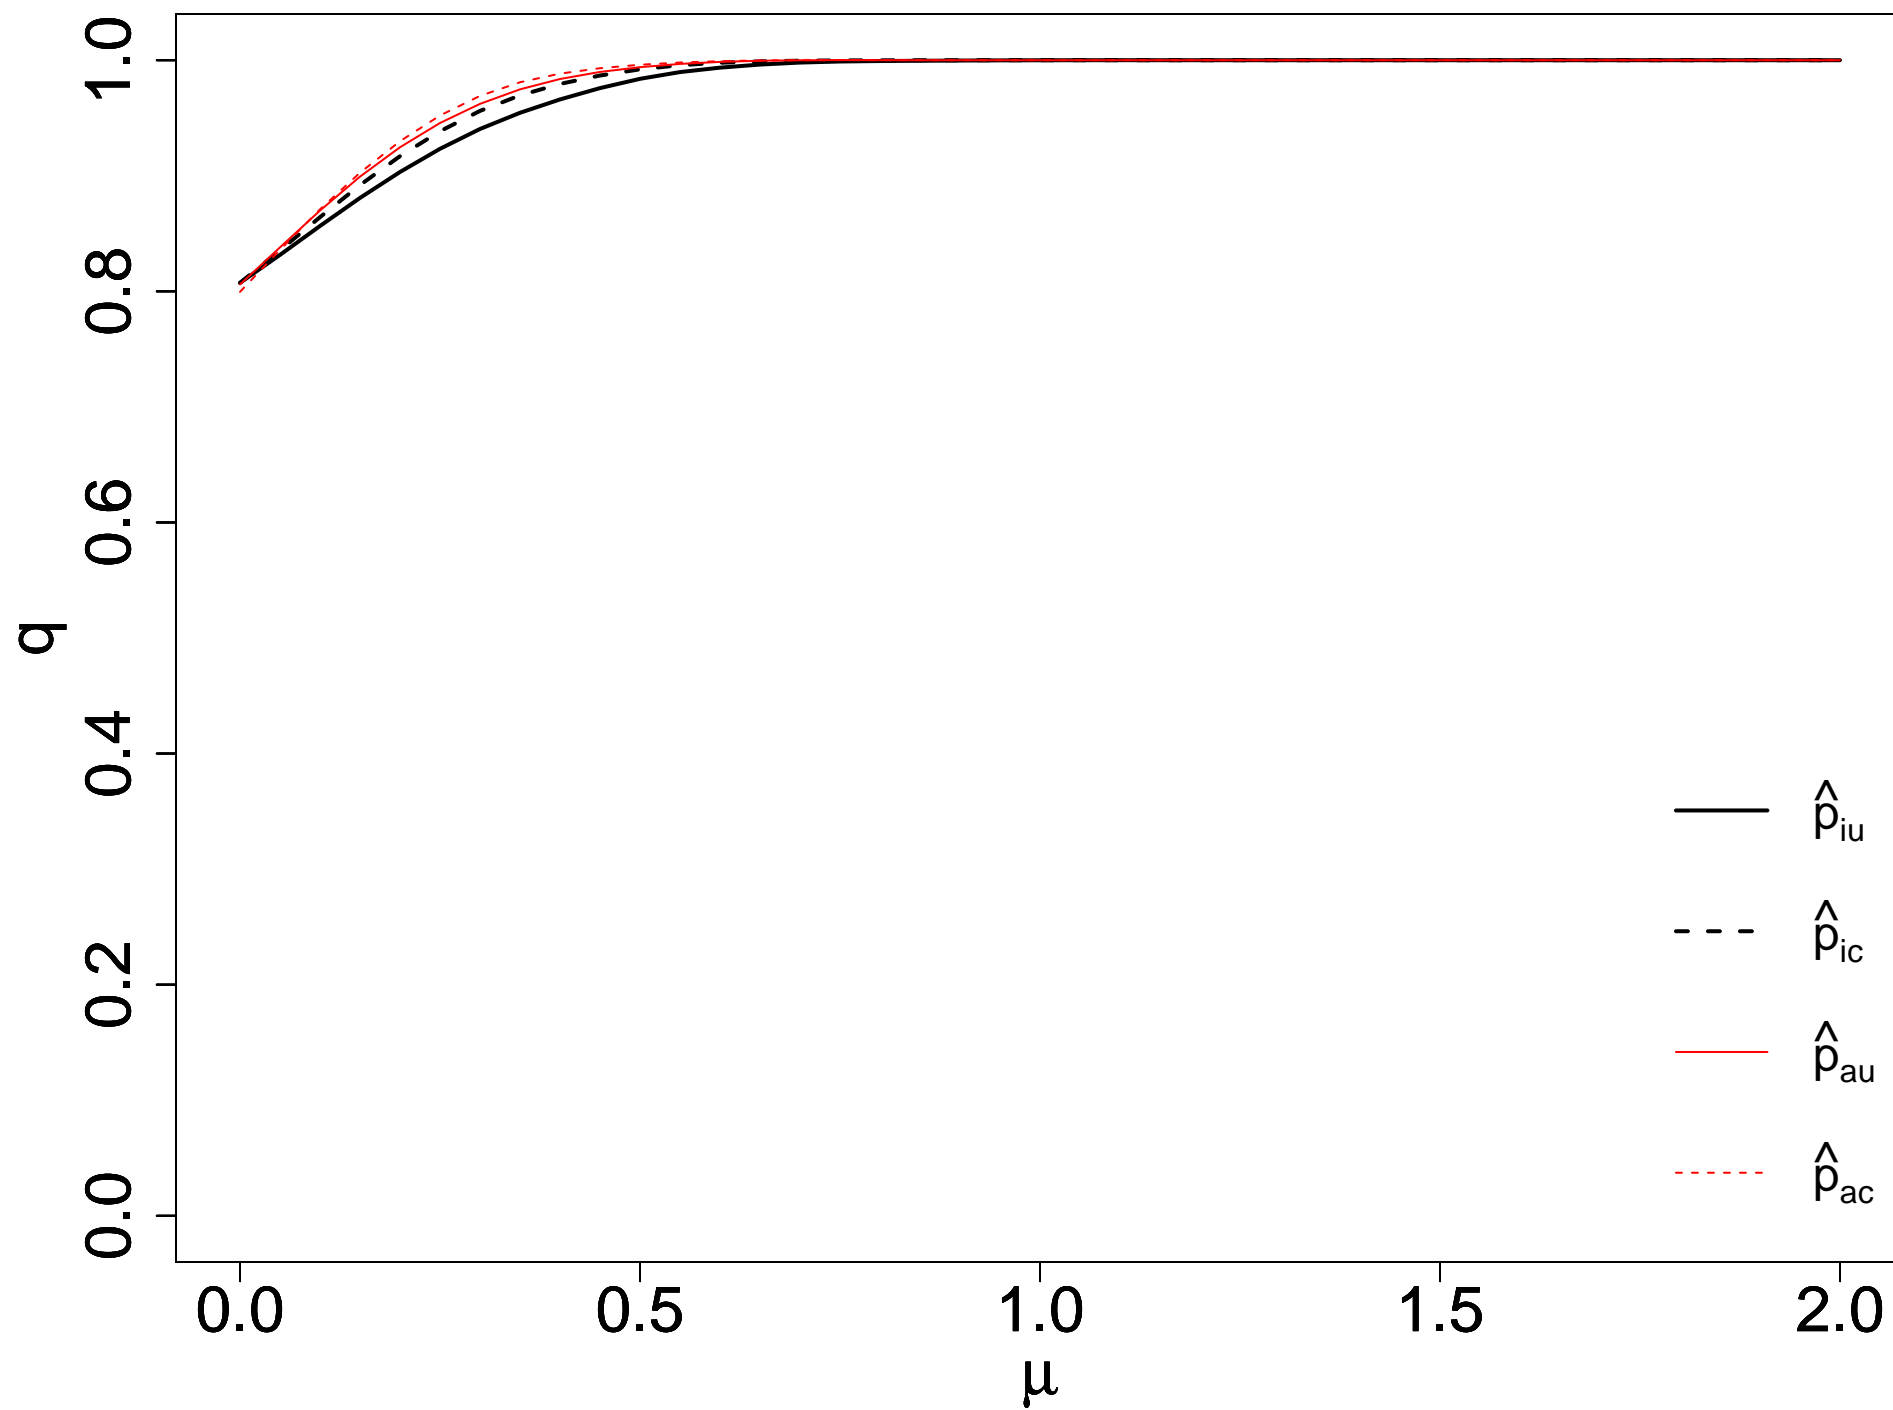

Supplement: Supplementary file 7 [file 1]

q curves for N=25, FAR=0.01

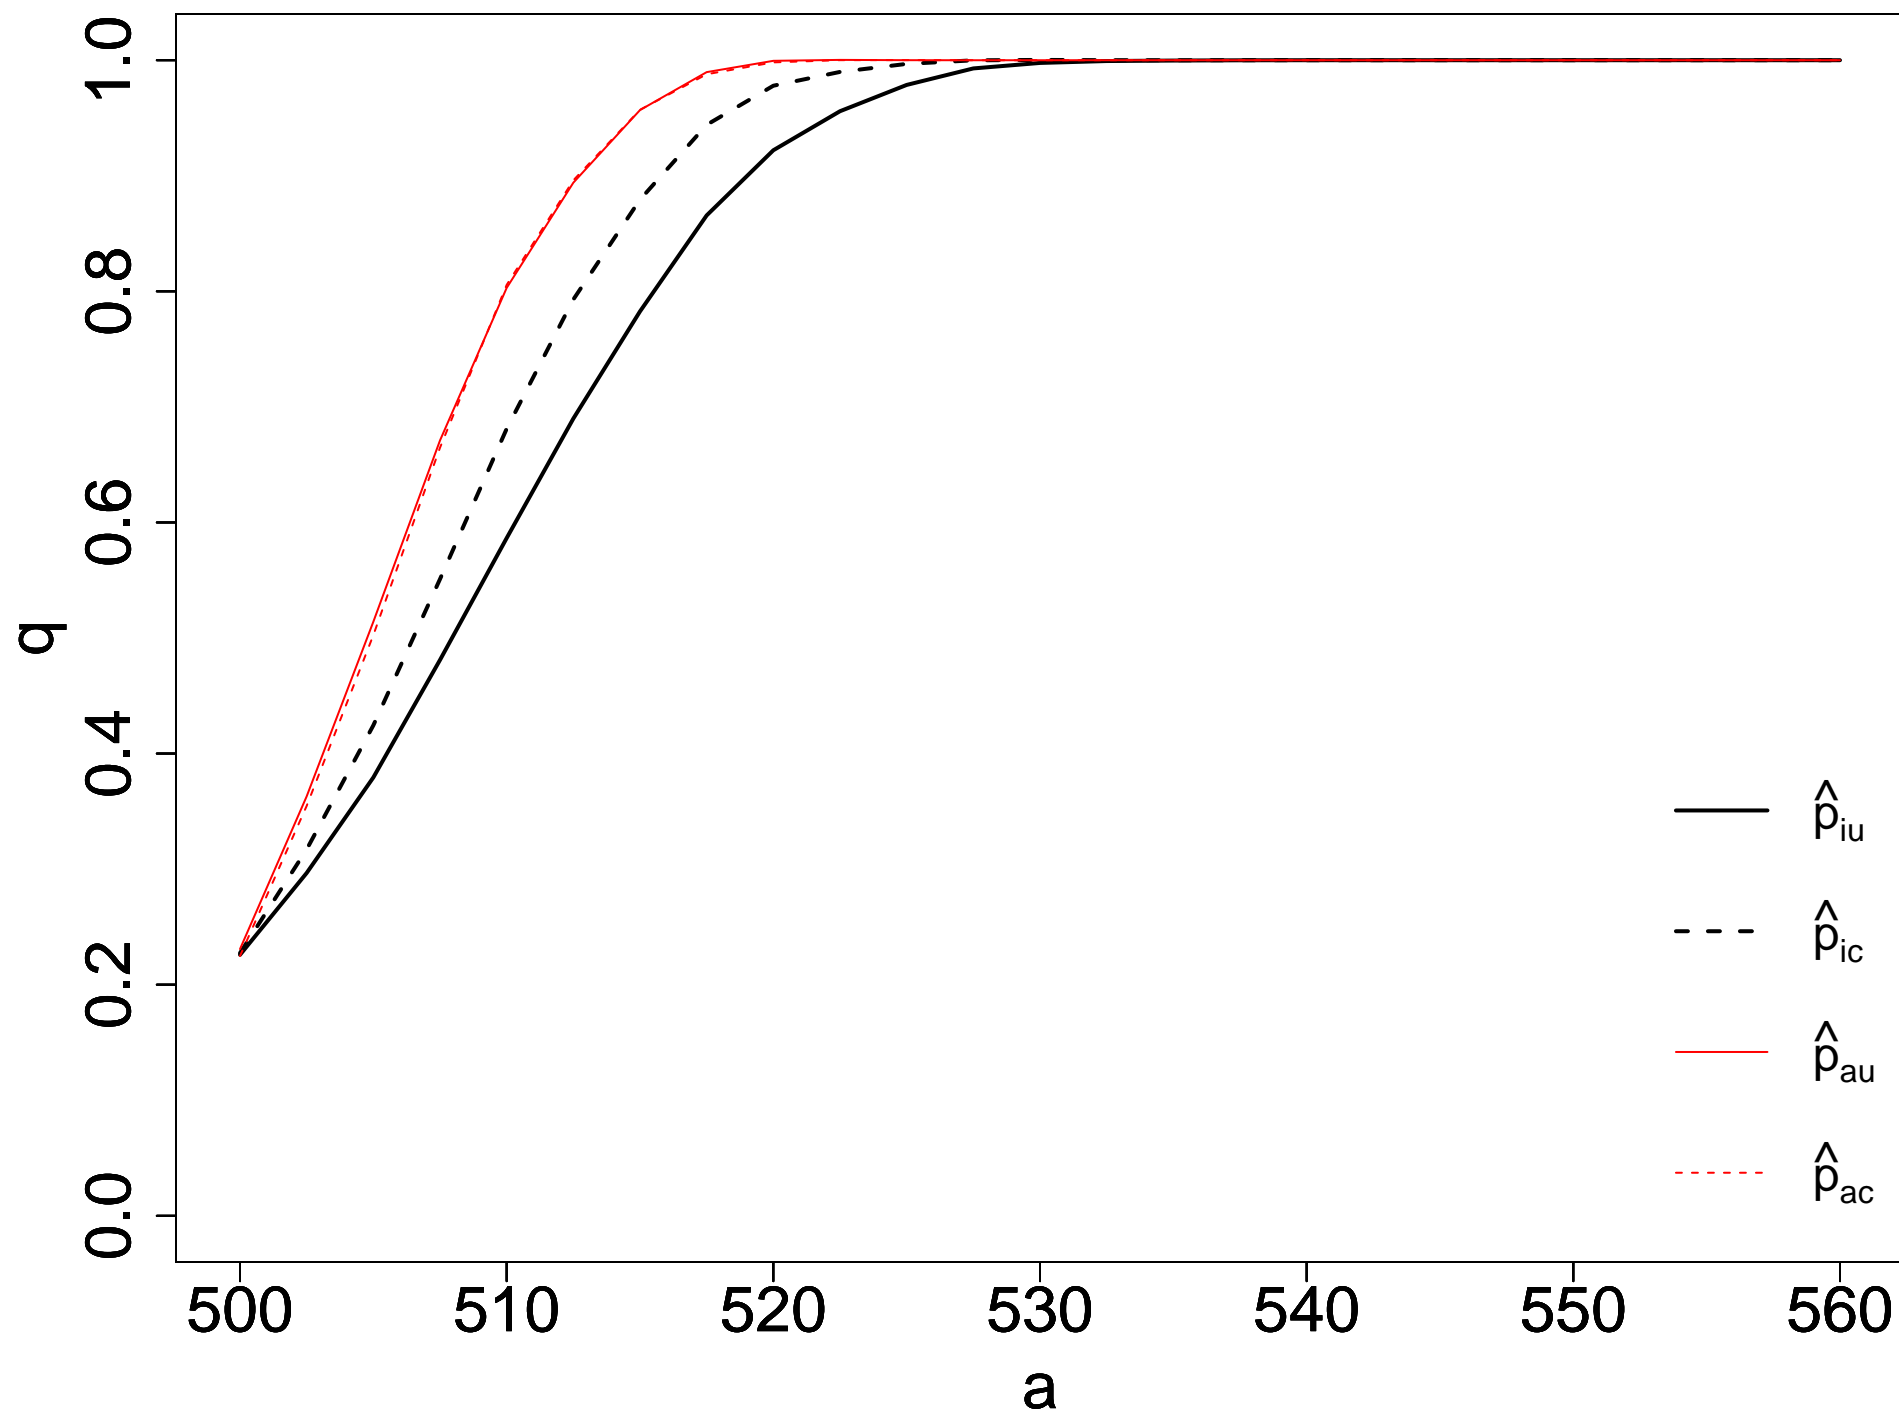

Supplement: Supplementary file 8 [file 1]

q curves for N=15, FAR=0.01

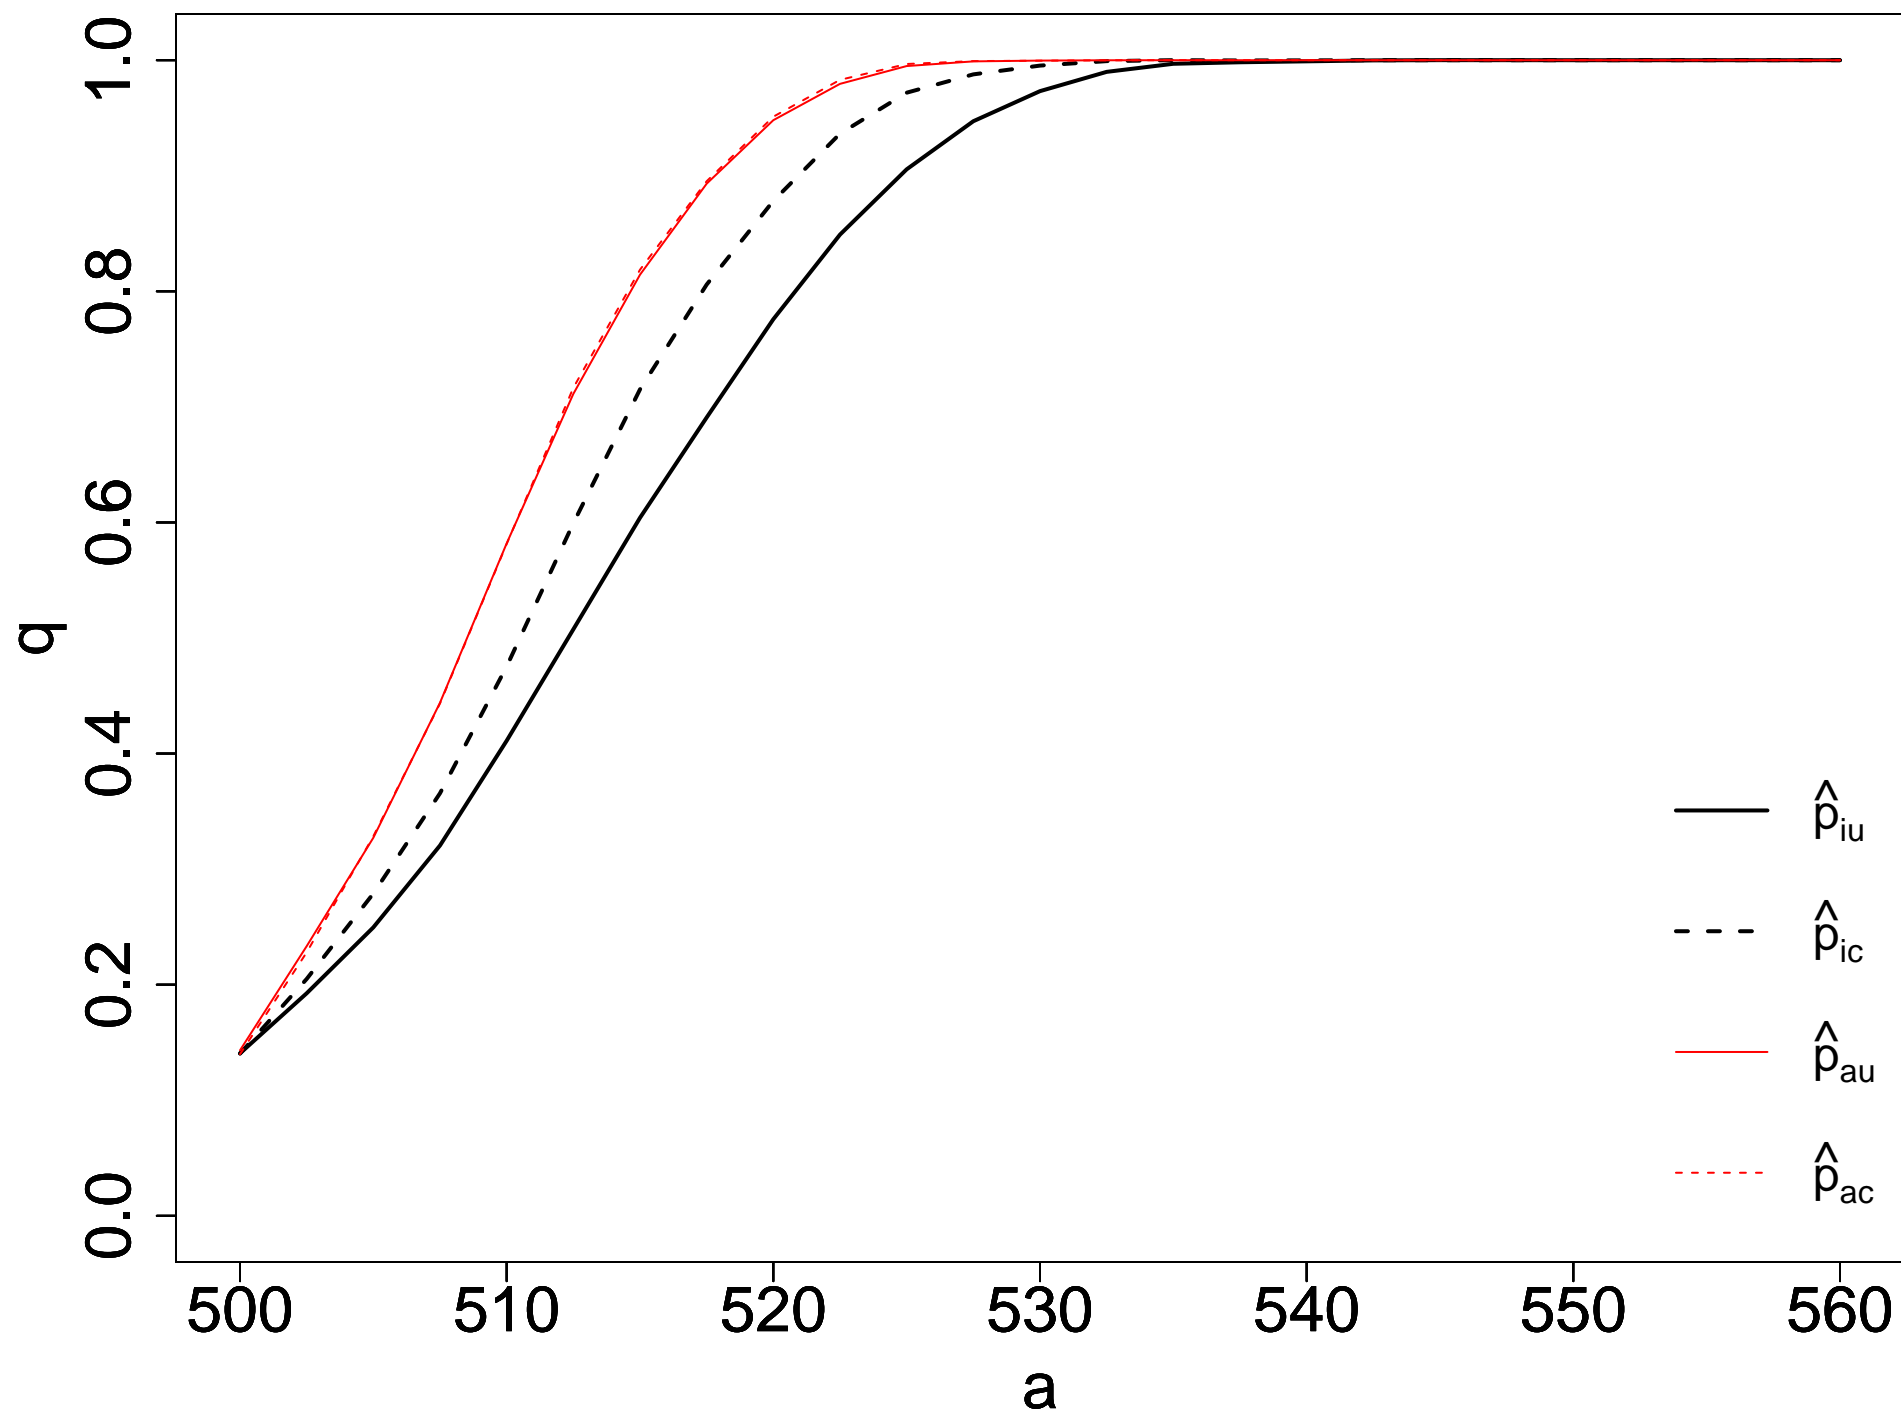

Supplement: Supplementary file 9 [file 1]

TARL curves for N=15, FAR=0.01

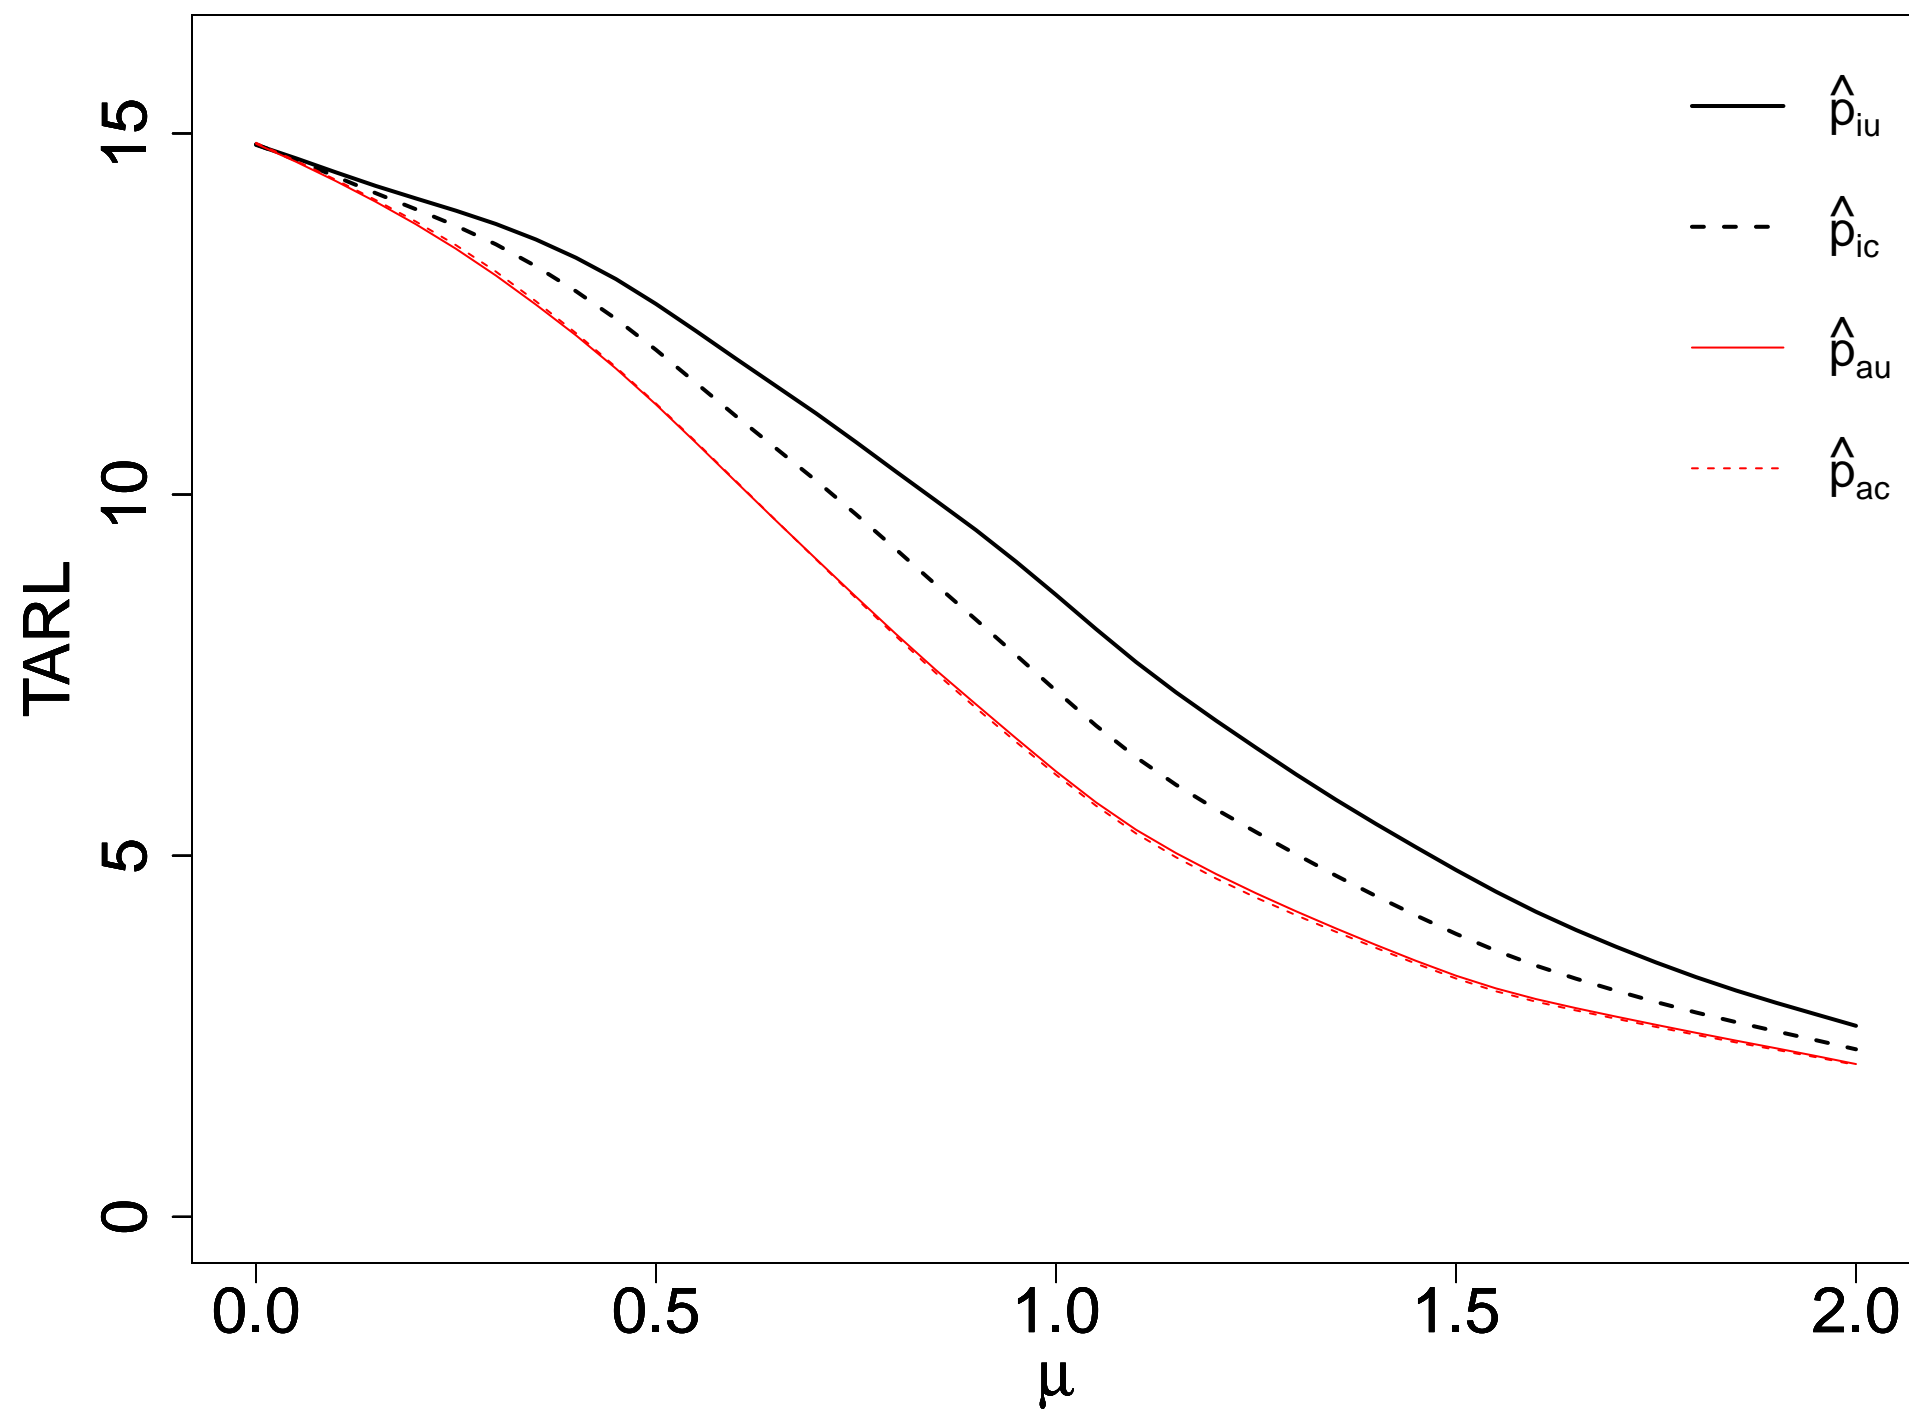

Supplement: Supplementary file 10 [file 1]

TARL curves for N=30, FAR=0.05

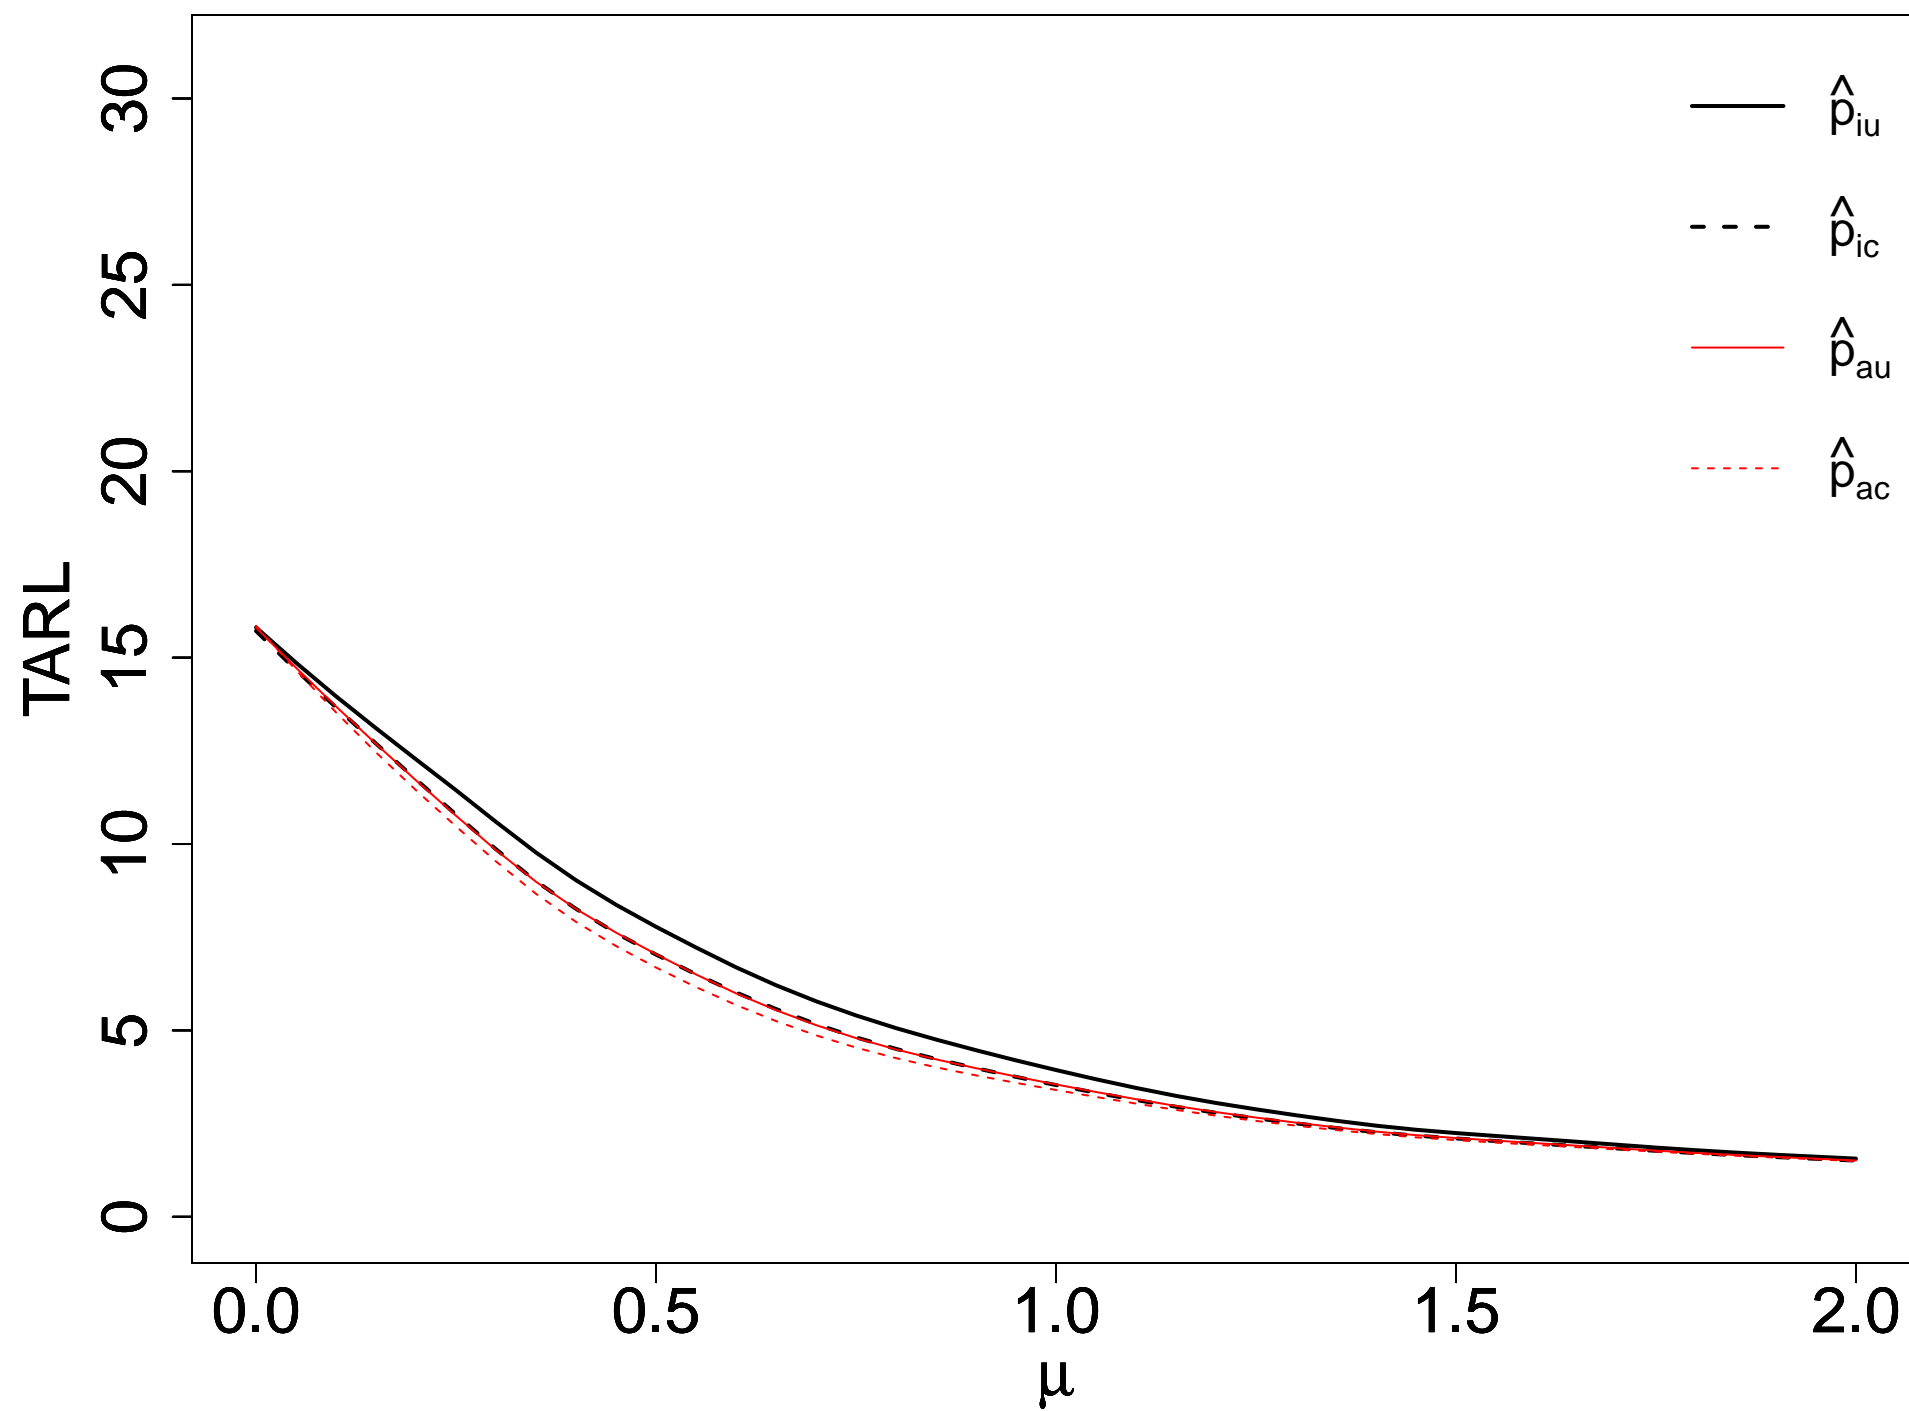

Supplement: Supplementary file 11 [file 1]

TARL curves for N=25, FAR=0.01

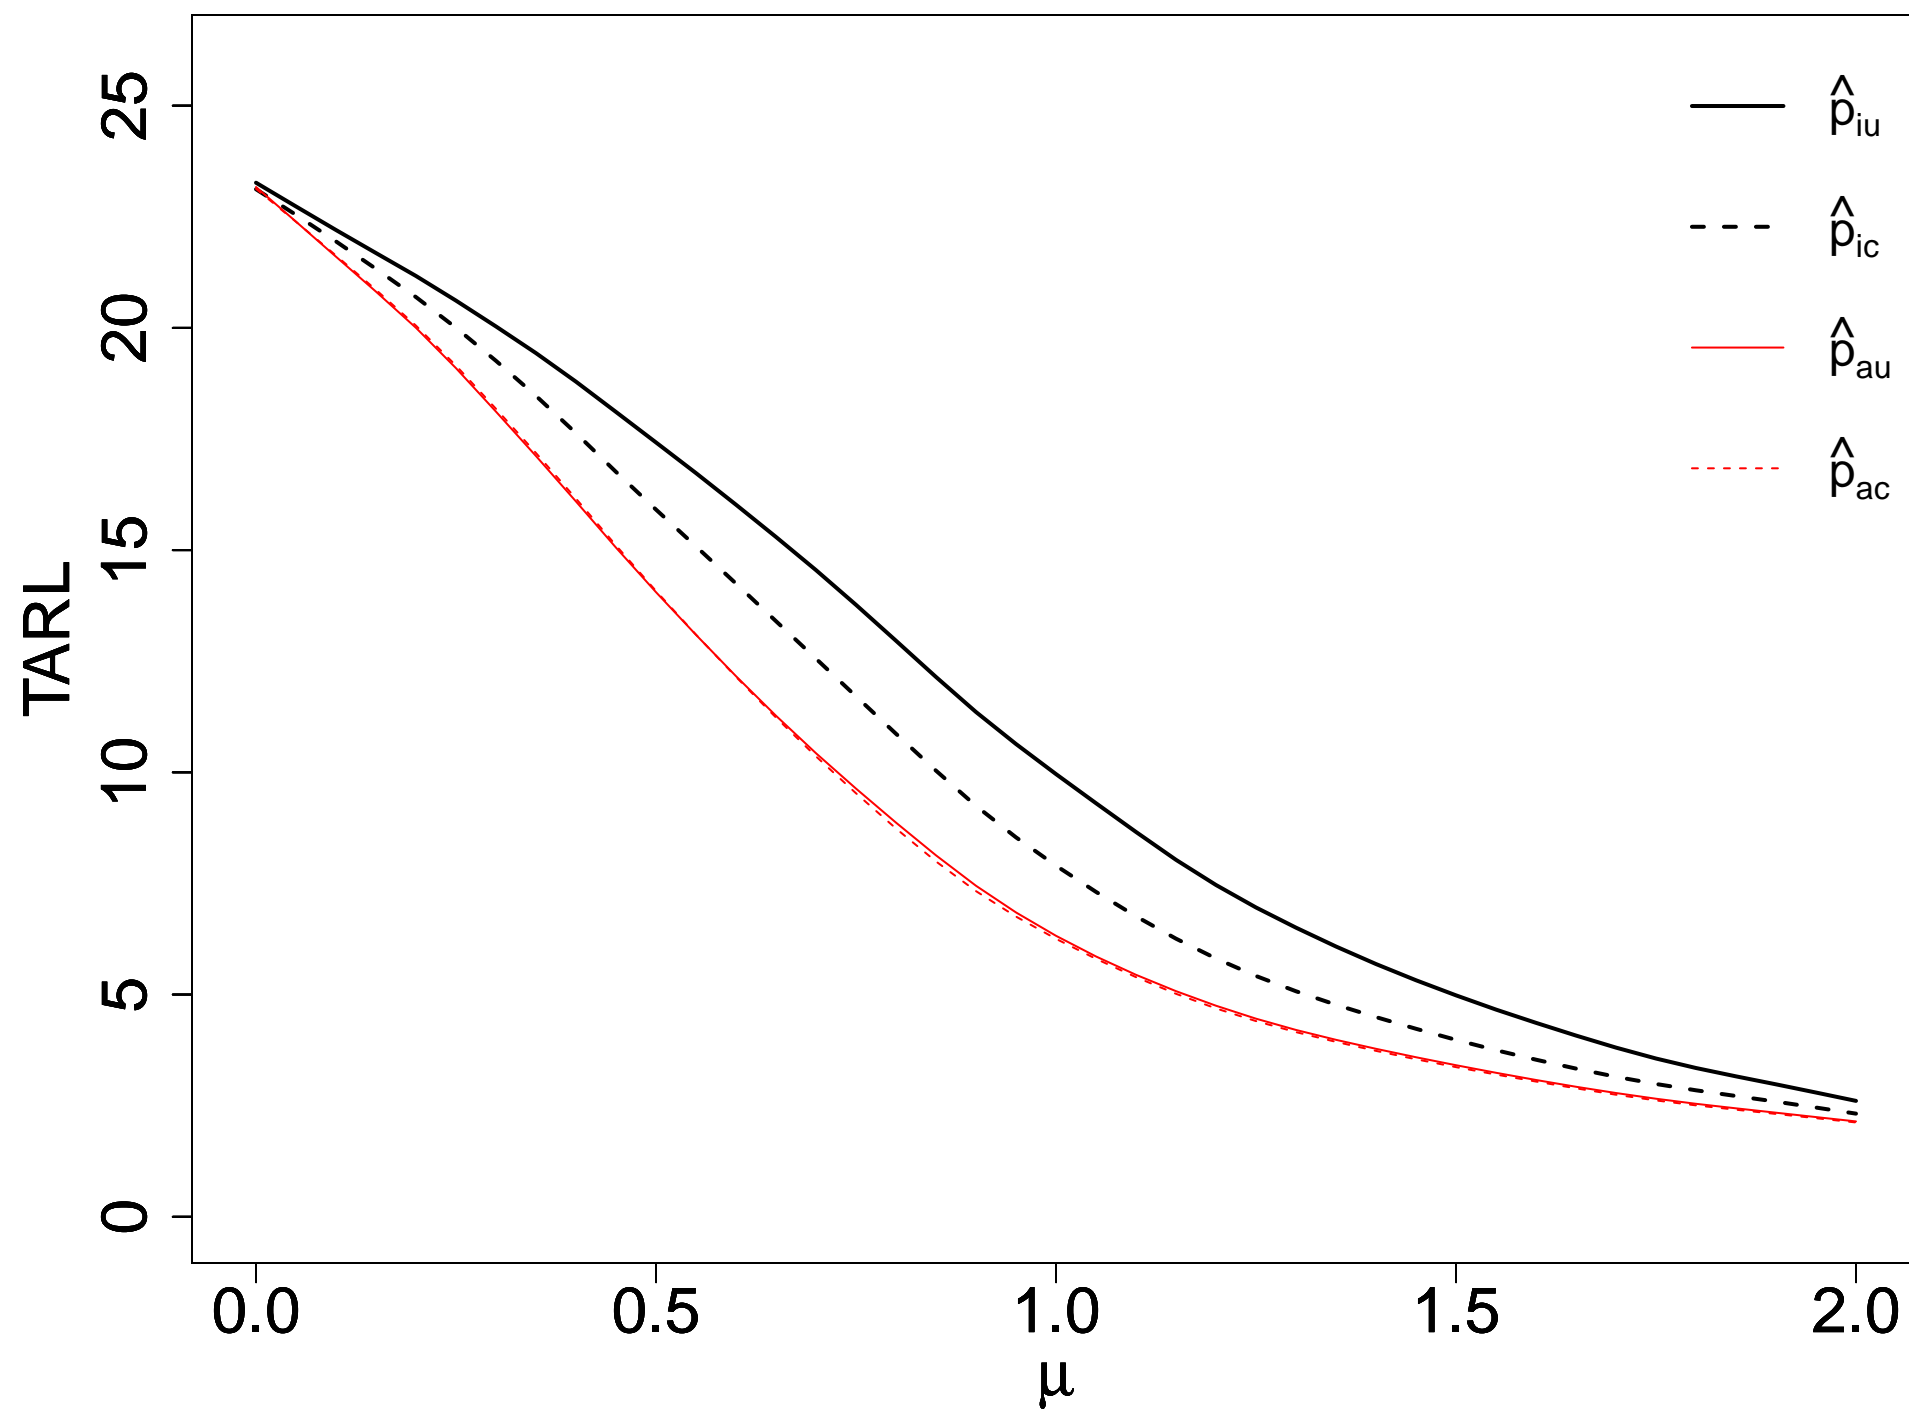

Supplement: Supplementary file 12 [file 1]

q curves for N=30, FAR=0.001

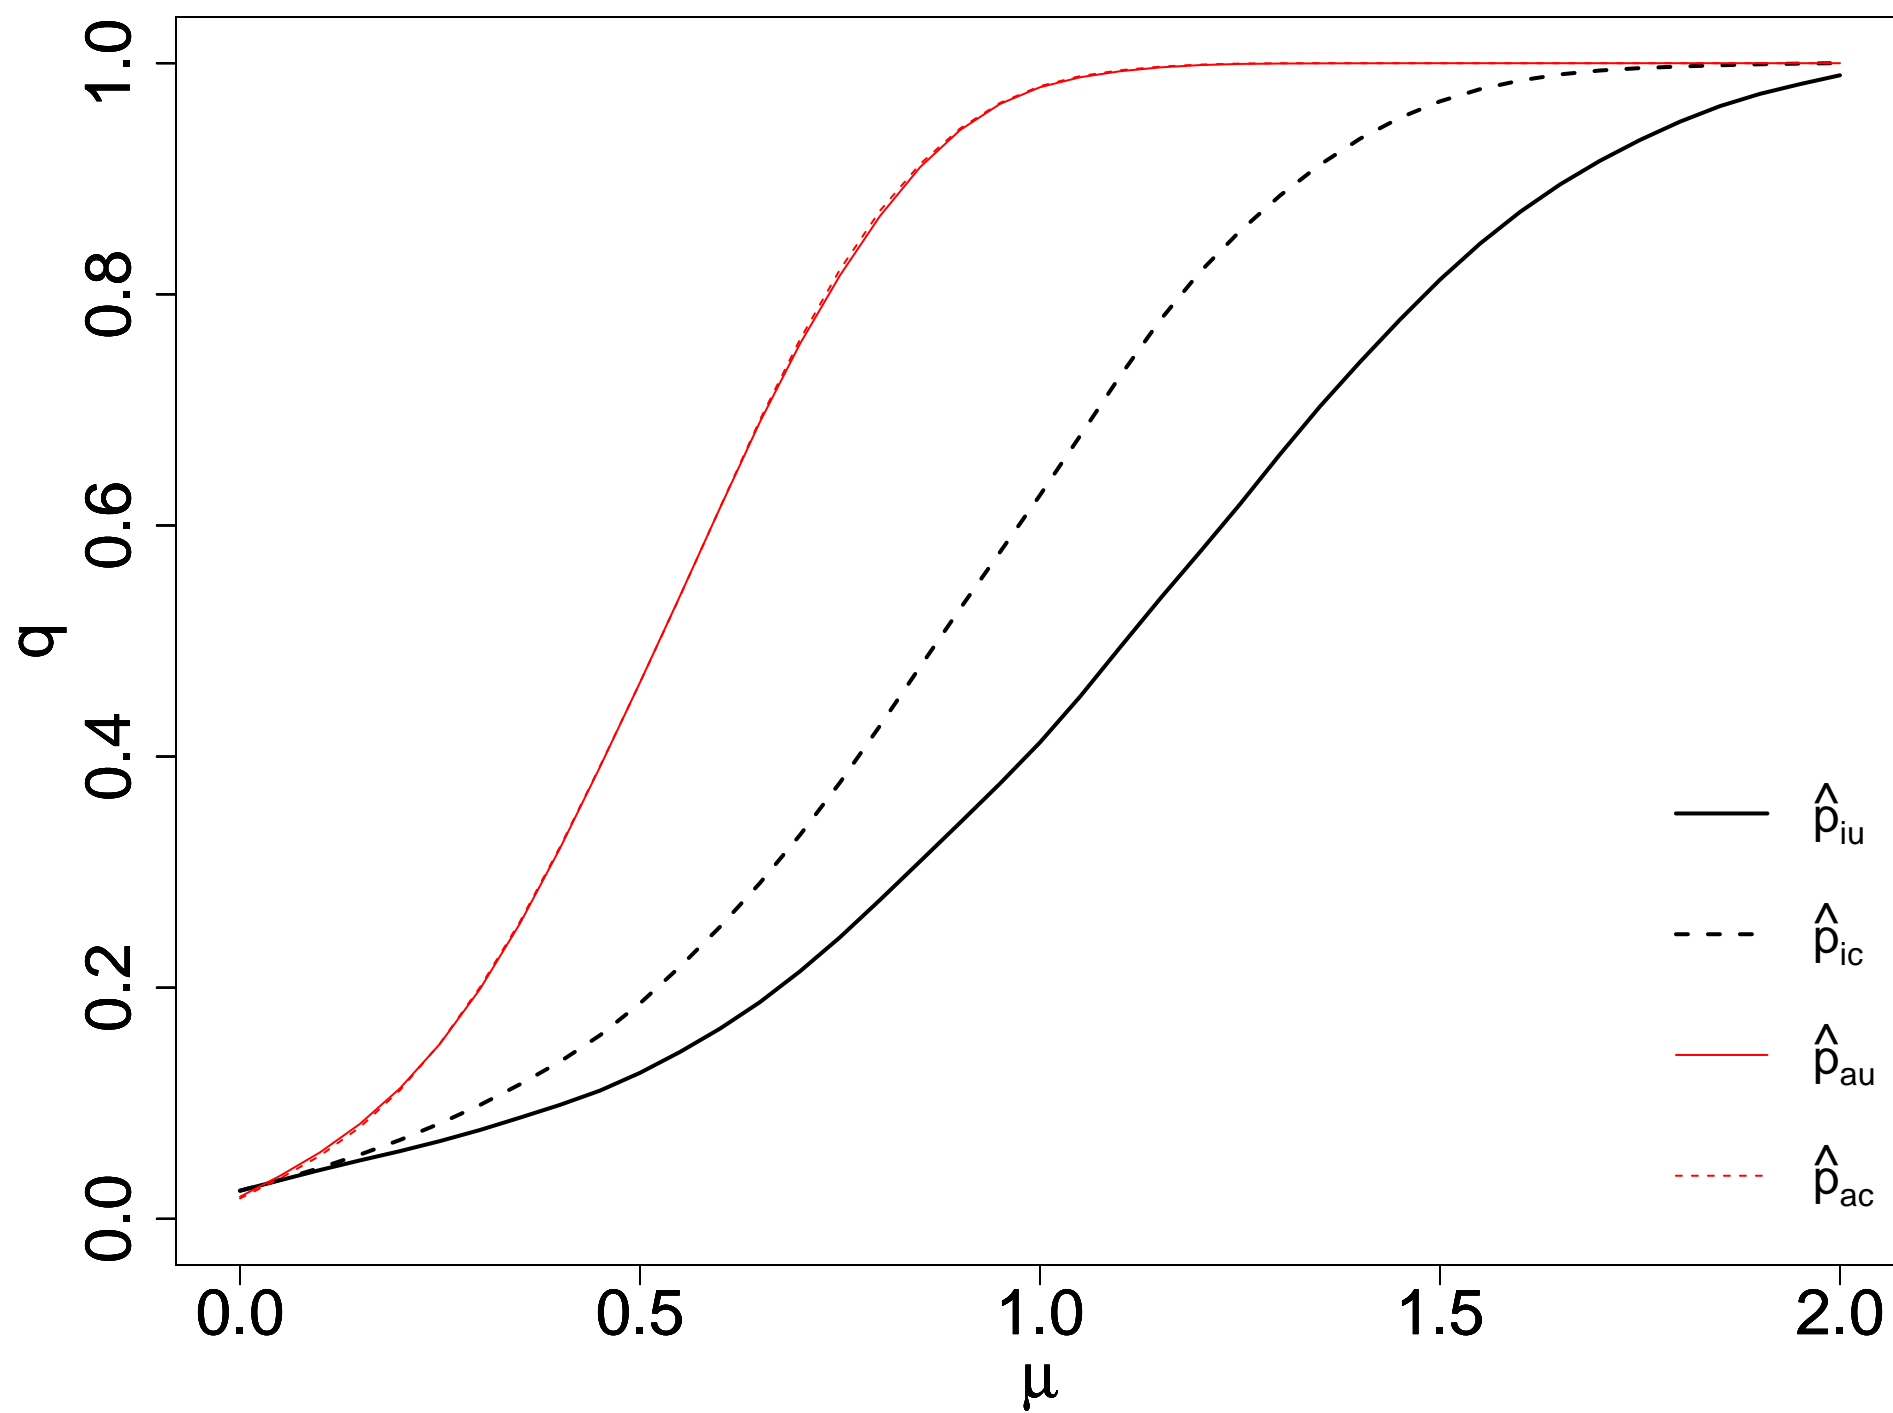

Supplement: Supplementary file 13 [file 1]

q curves for N=30, FAR=0.01

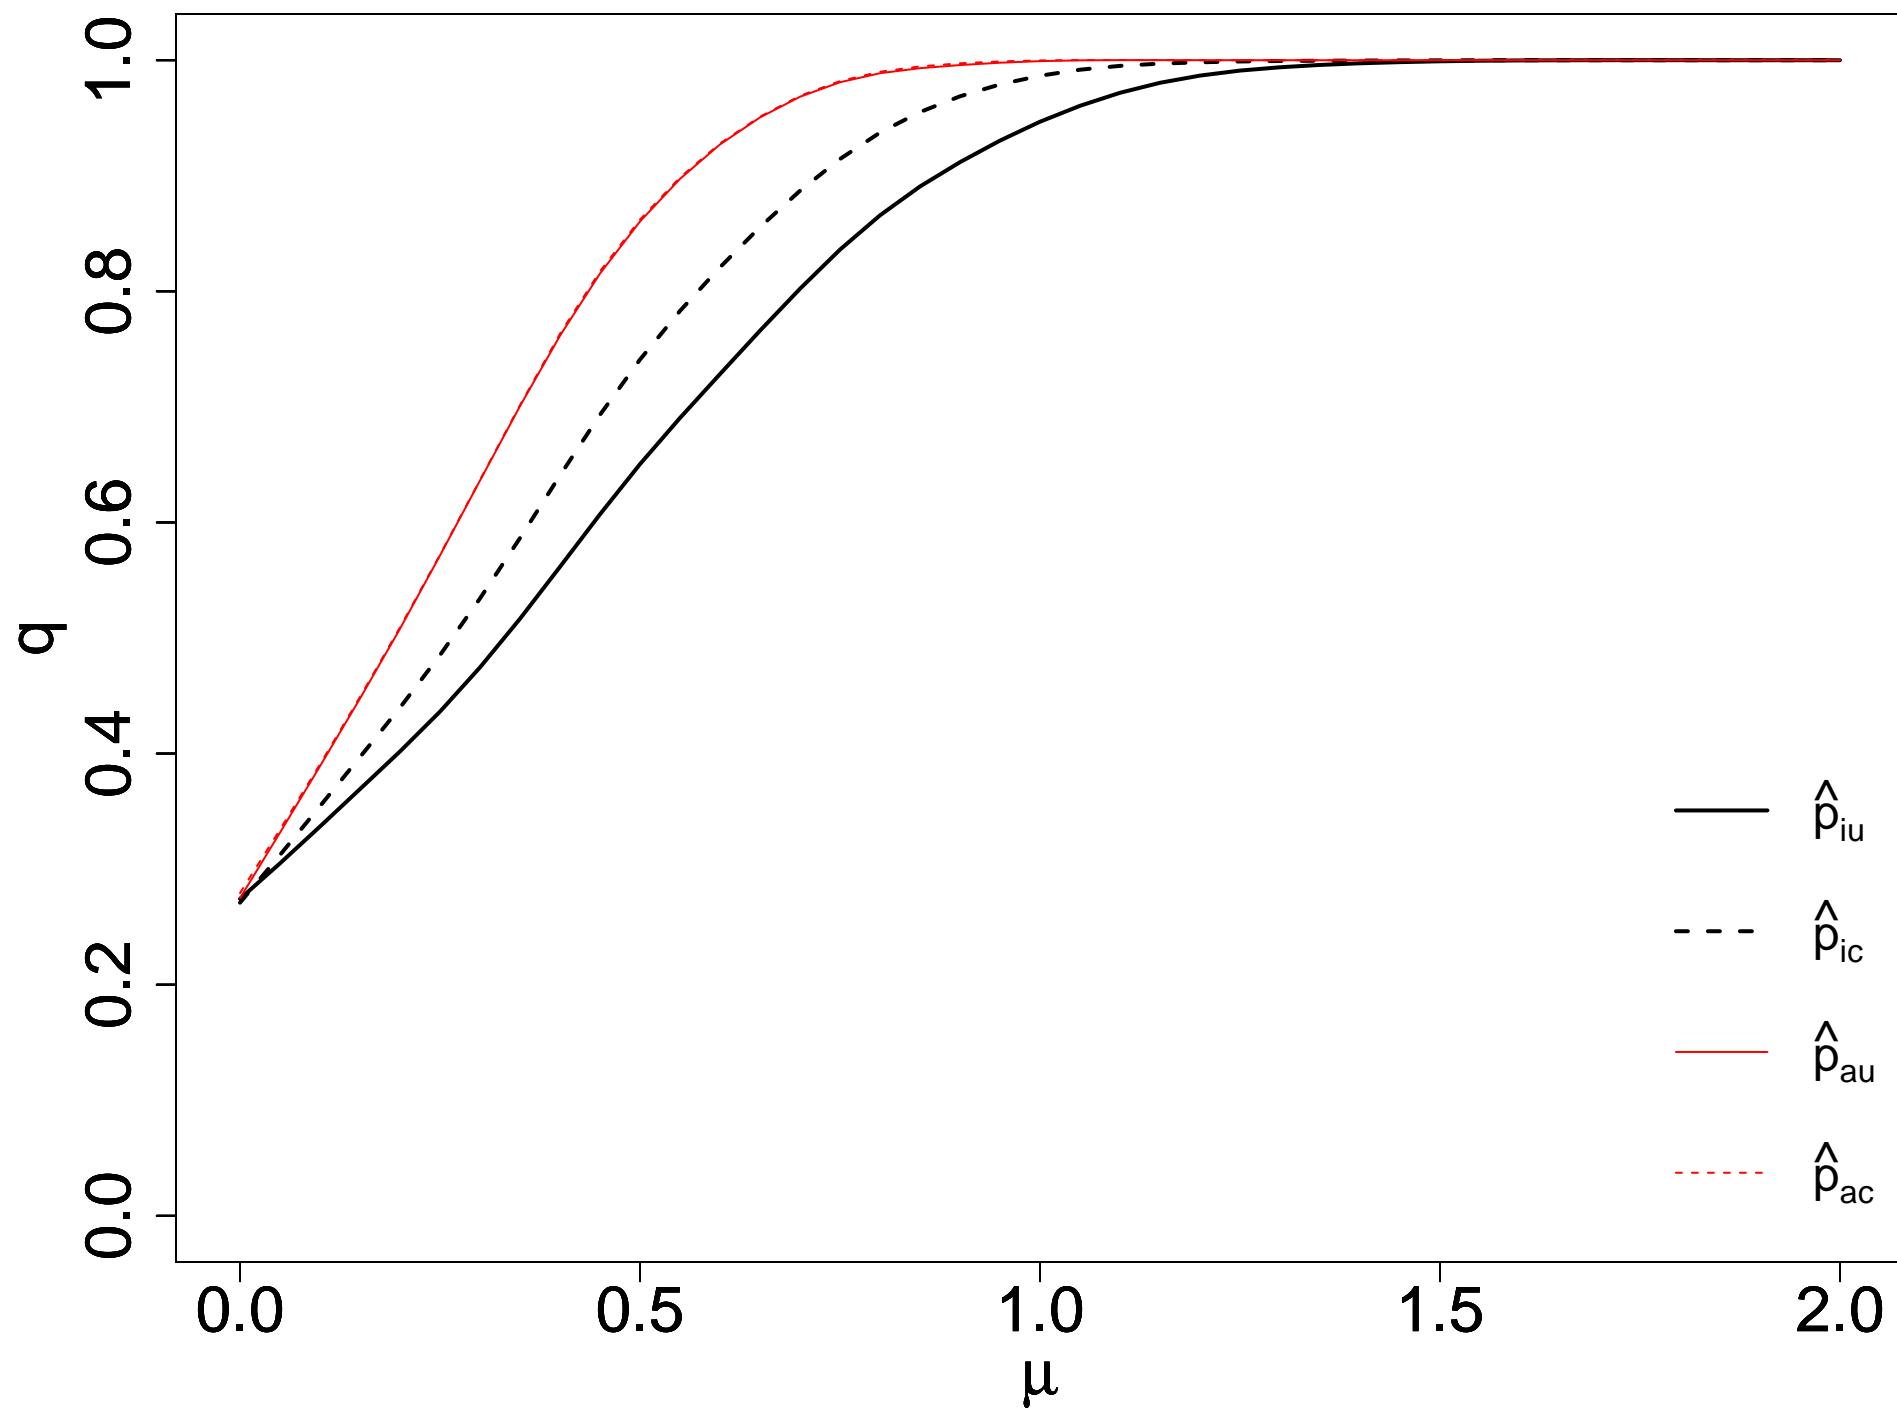

Supplement: Supplementary file 14 [file 1]

TARL curves for N=15, FAR=0.001

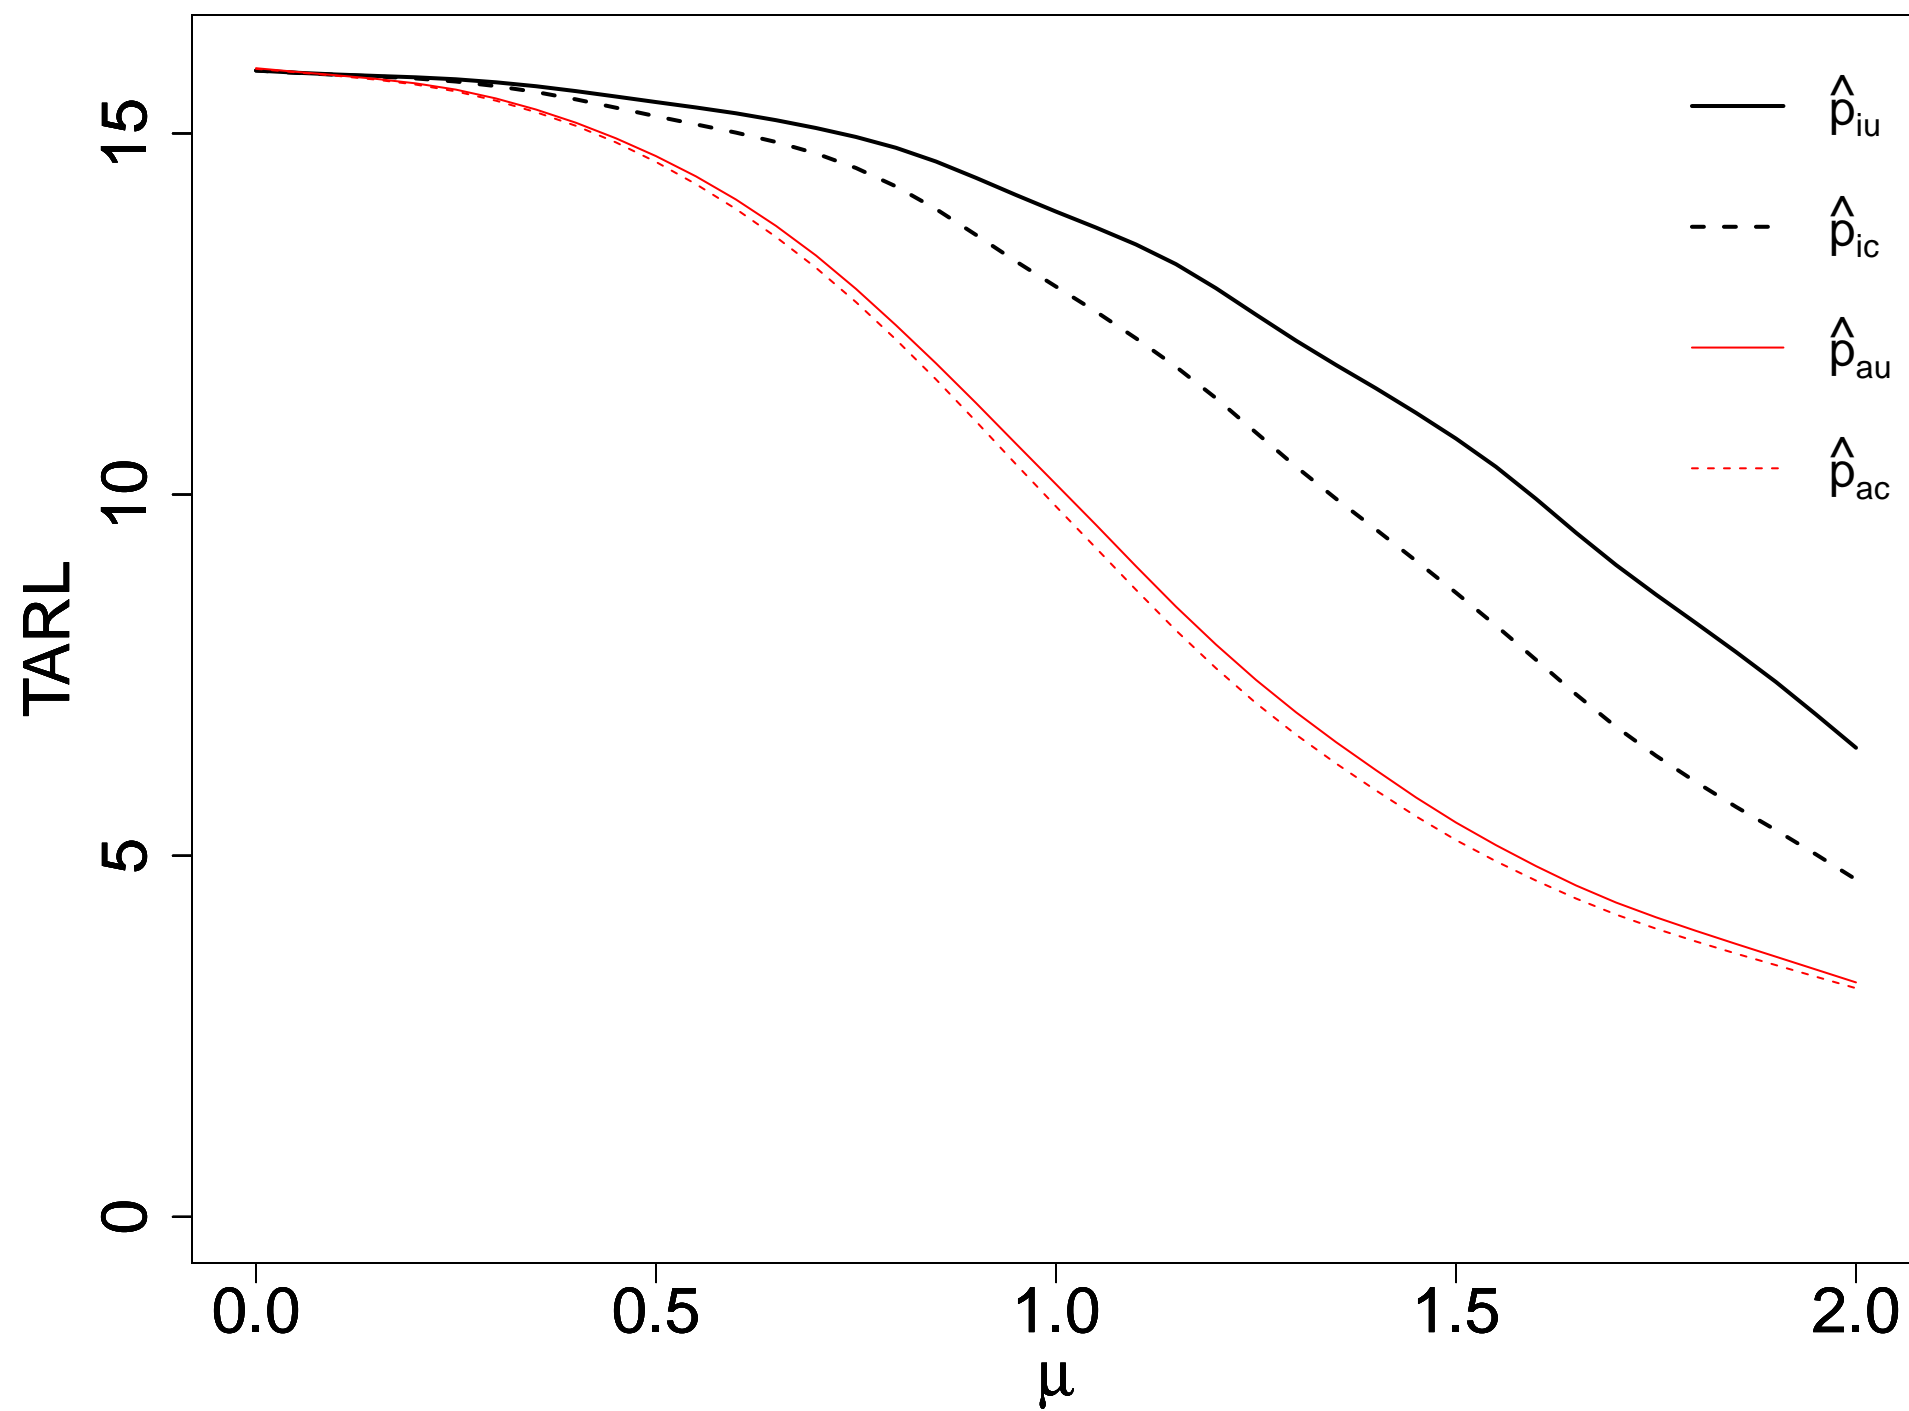

Supplement: Supplementary file 15 [file 1]

q curves for N=15, FAR=0.001

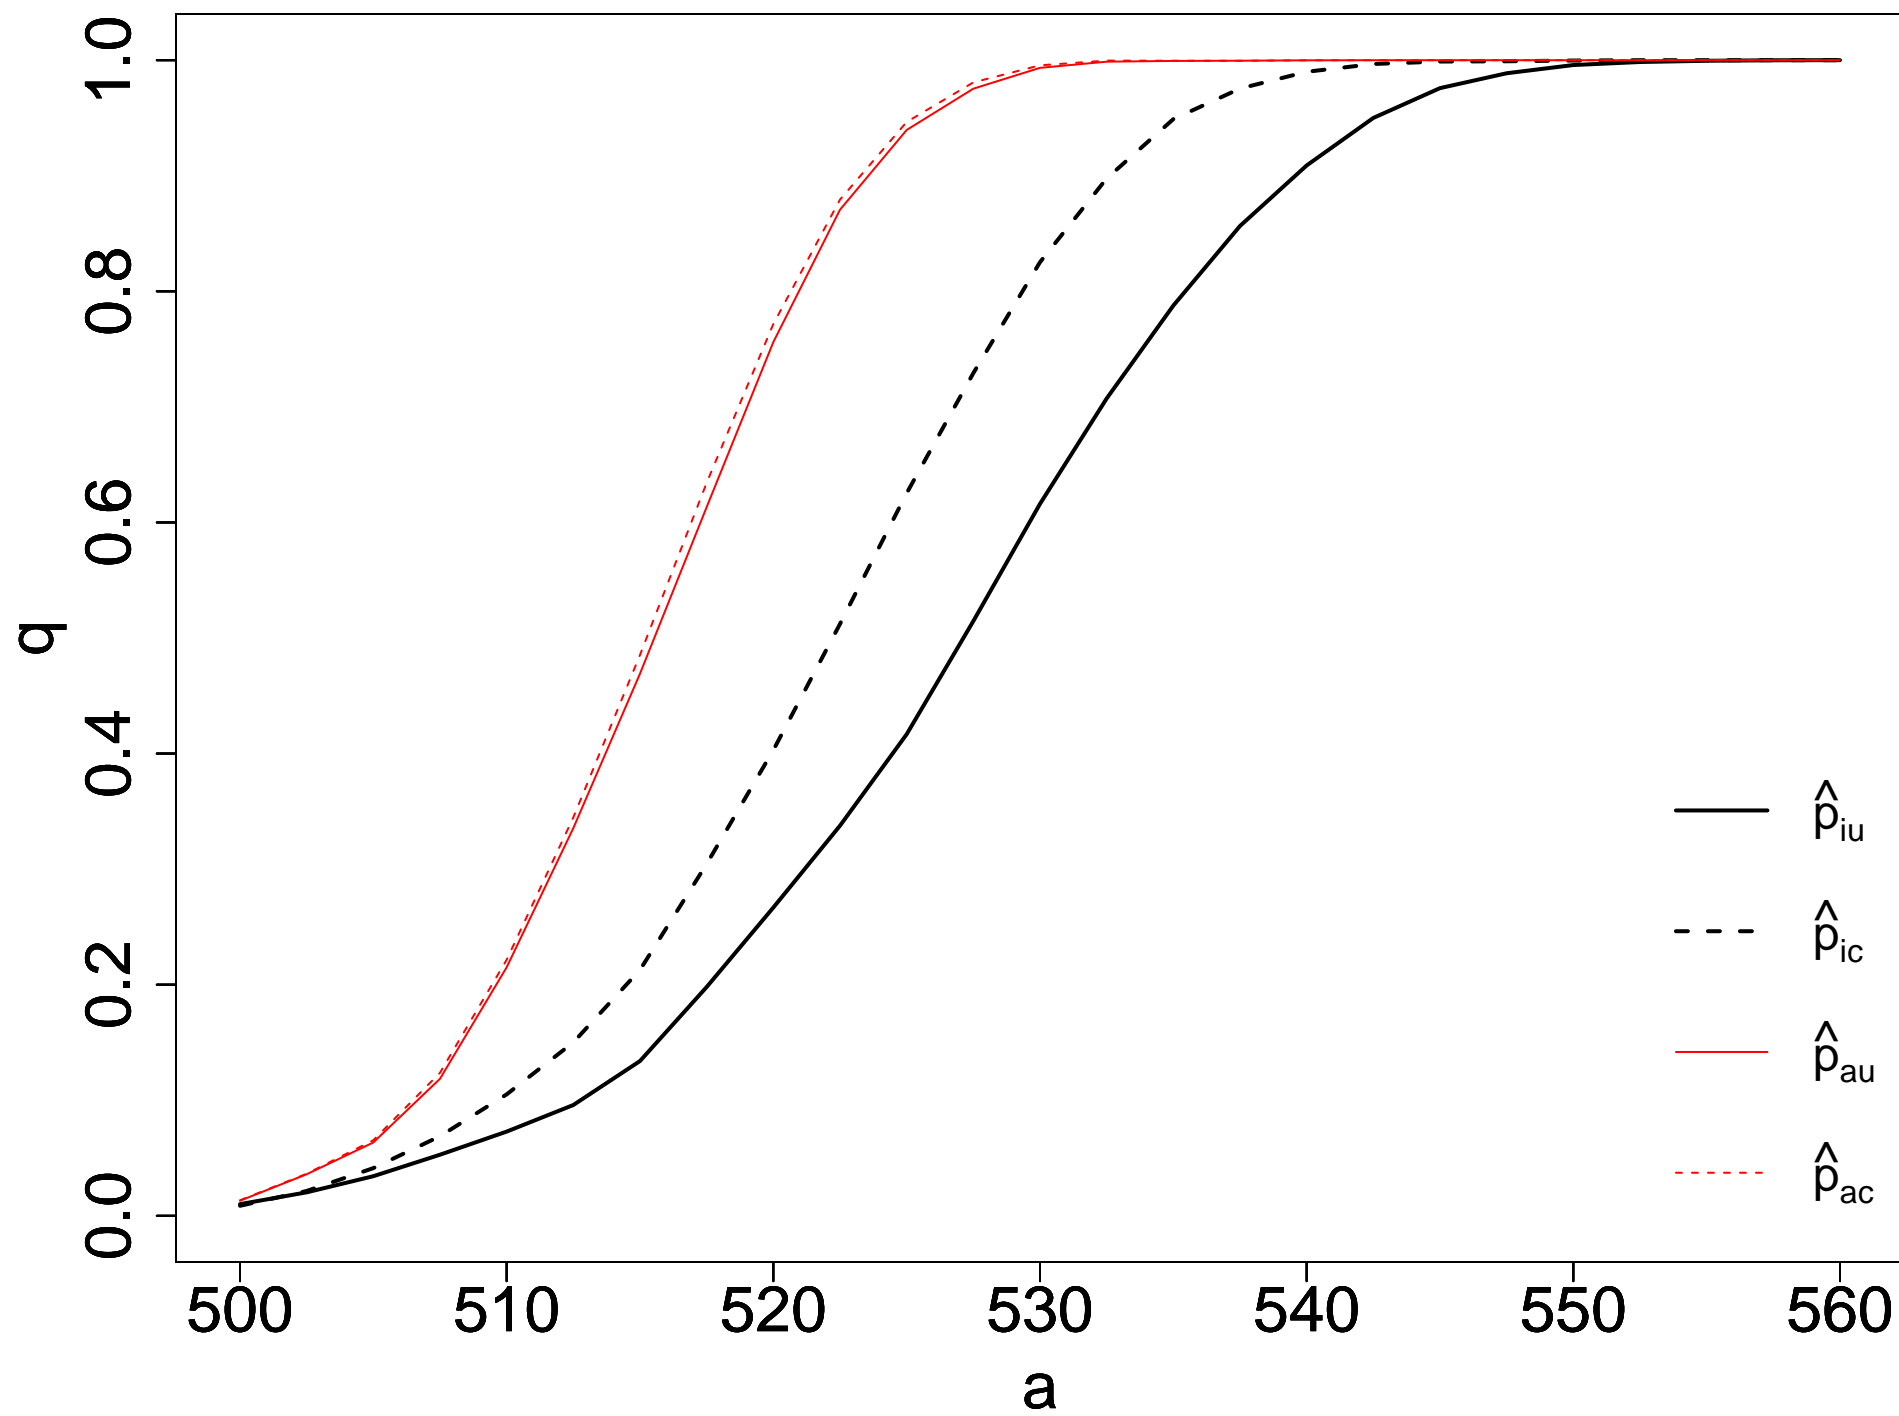

Supplement: Supplementary file 16 [file 1]

TARL curves for N=15, FAR=0.05

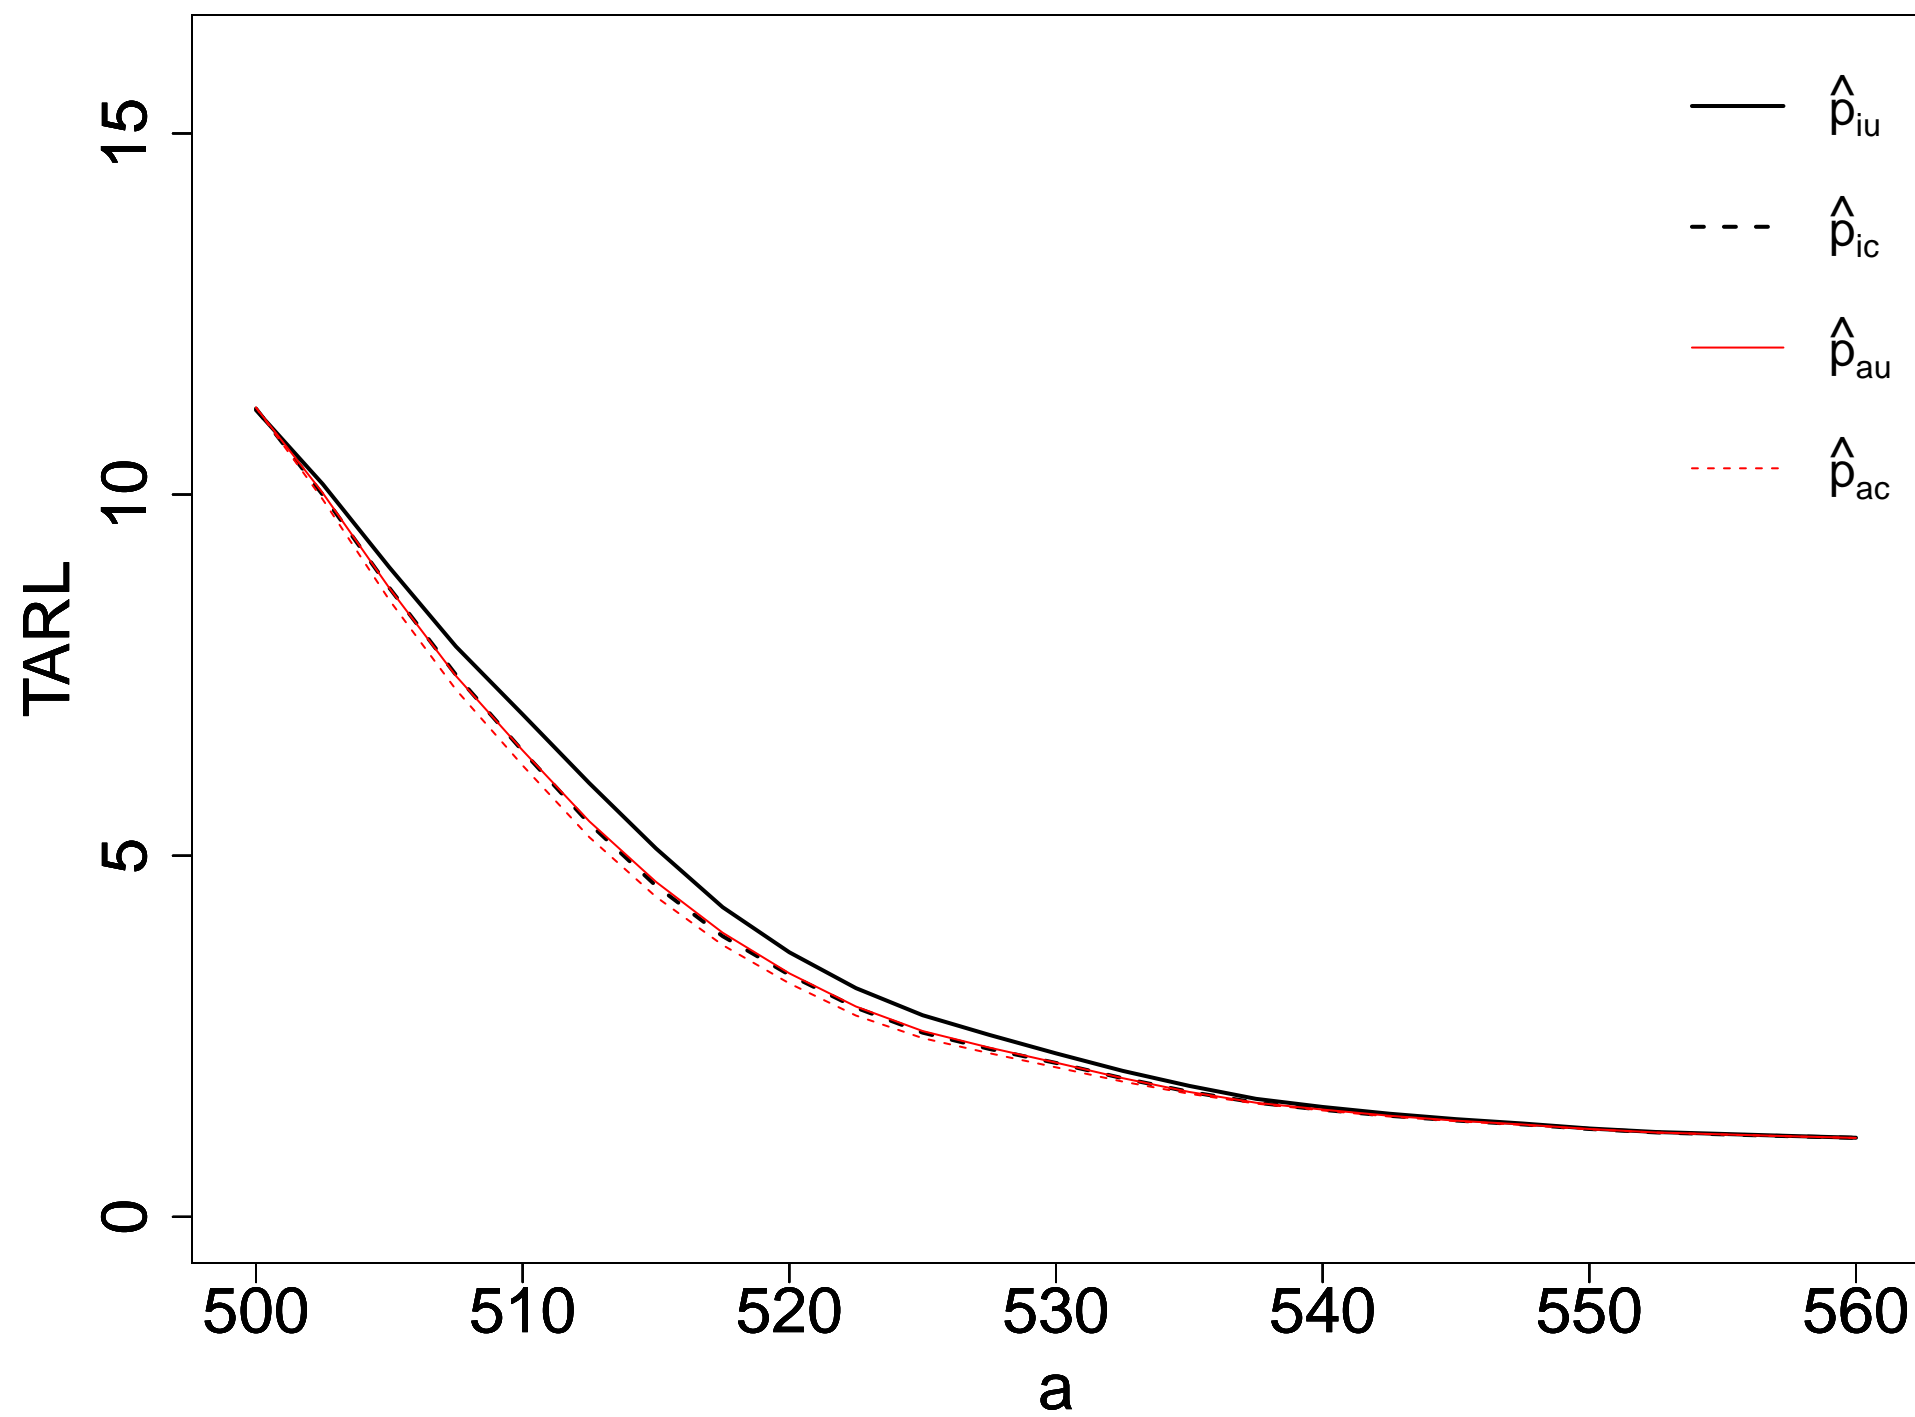

Supplement: Supplementary file 17 [file 1]

q curves for N=25, FAR=0.05

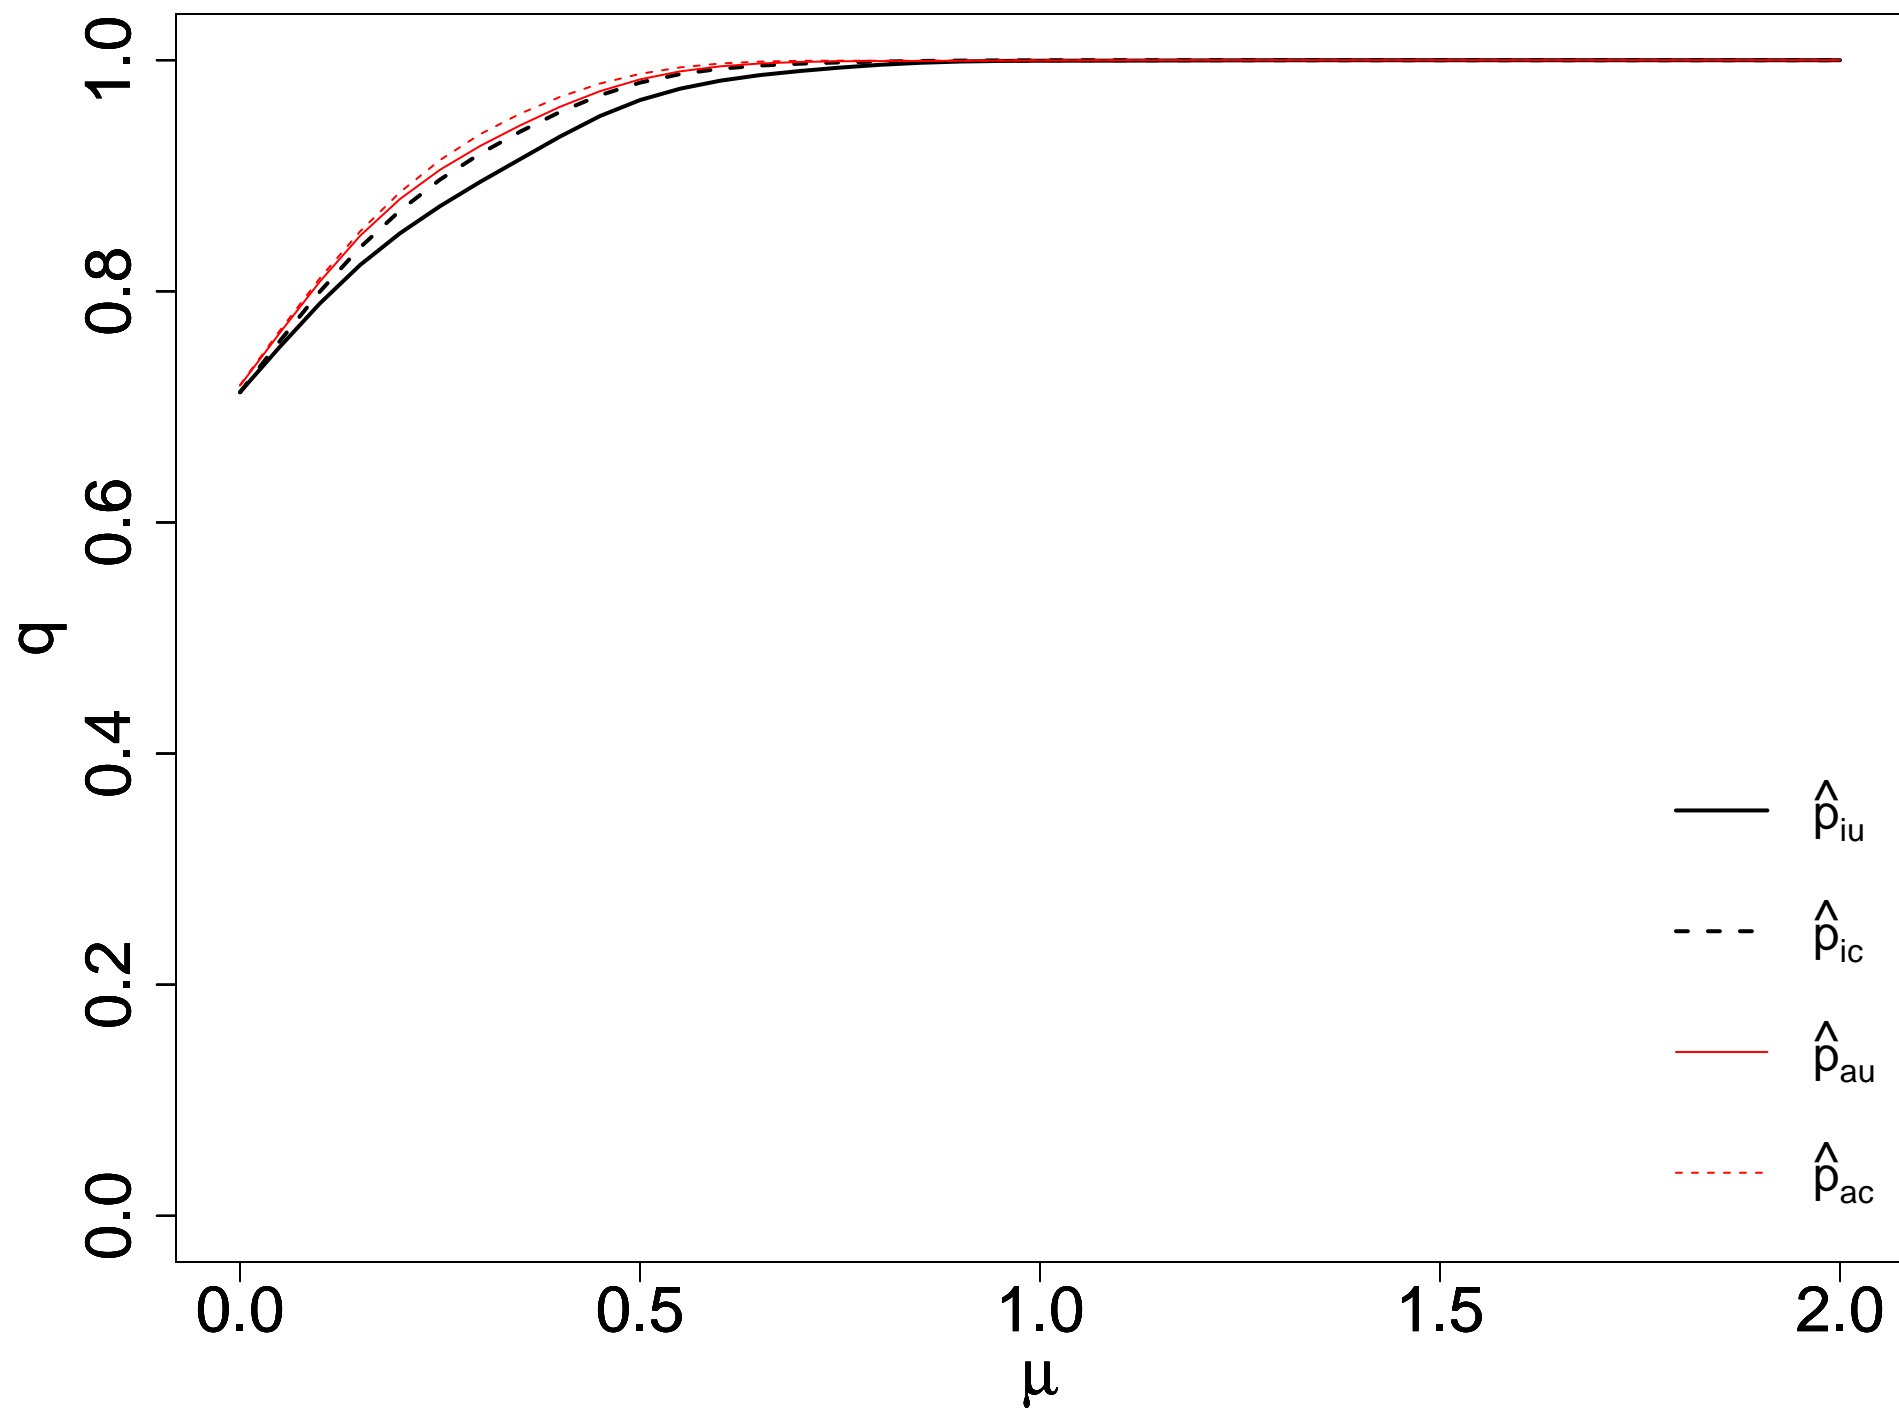

Supplement: Supplementary file 18 [file 1]

TARL curves for N=15, FAR=0.05

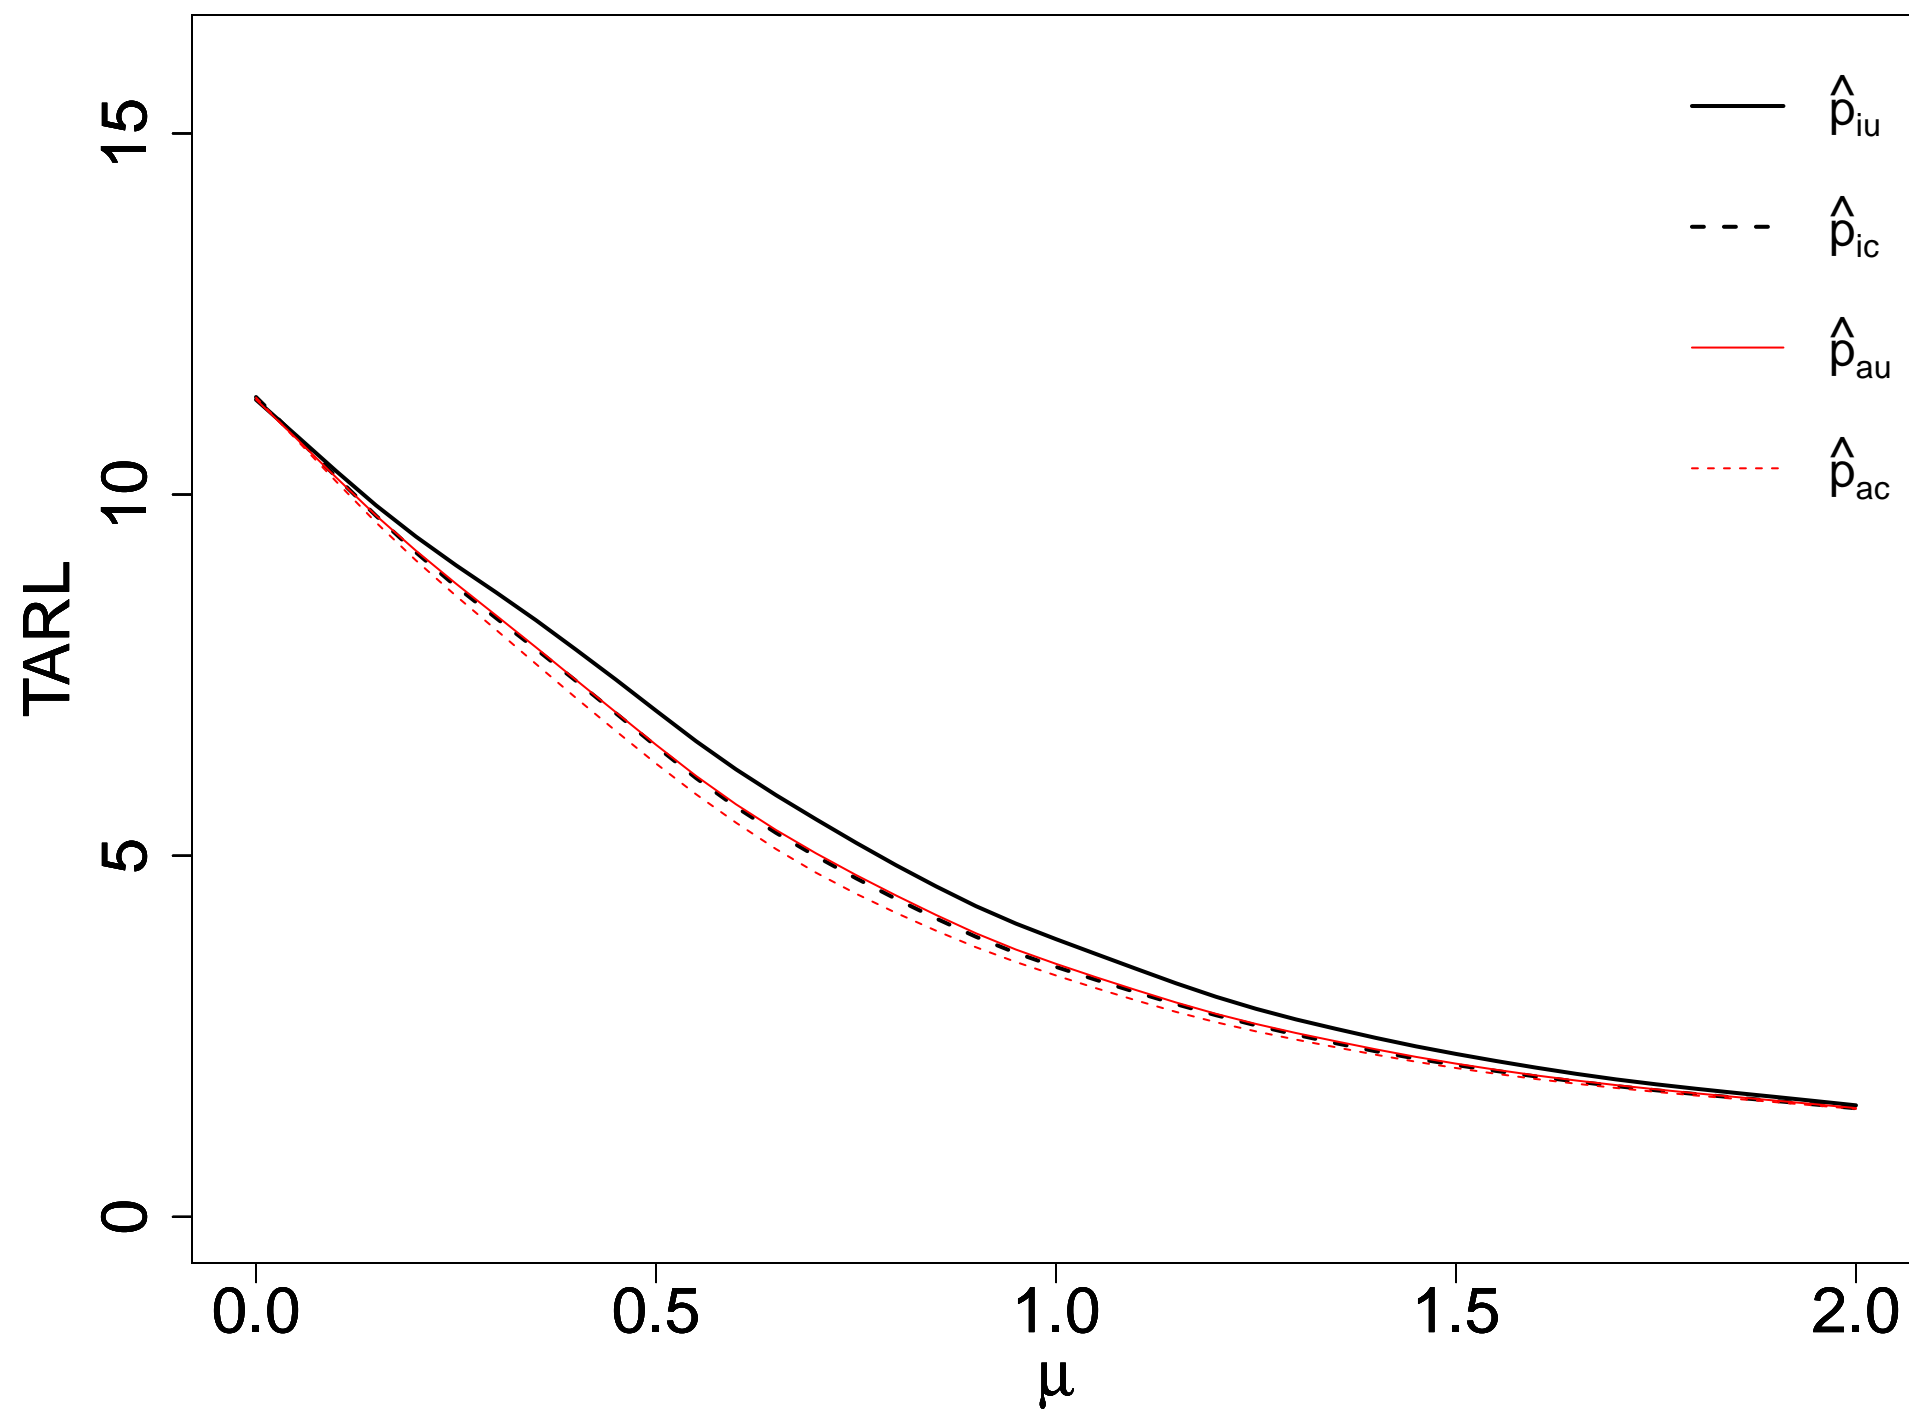

Supplement: Supplementary file 19 [file 1]

TARL curves for N=25, FAR=0.05

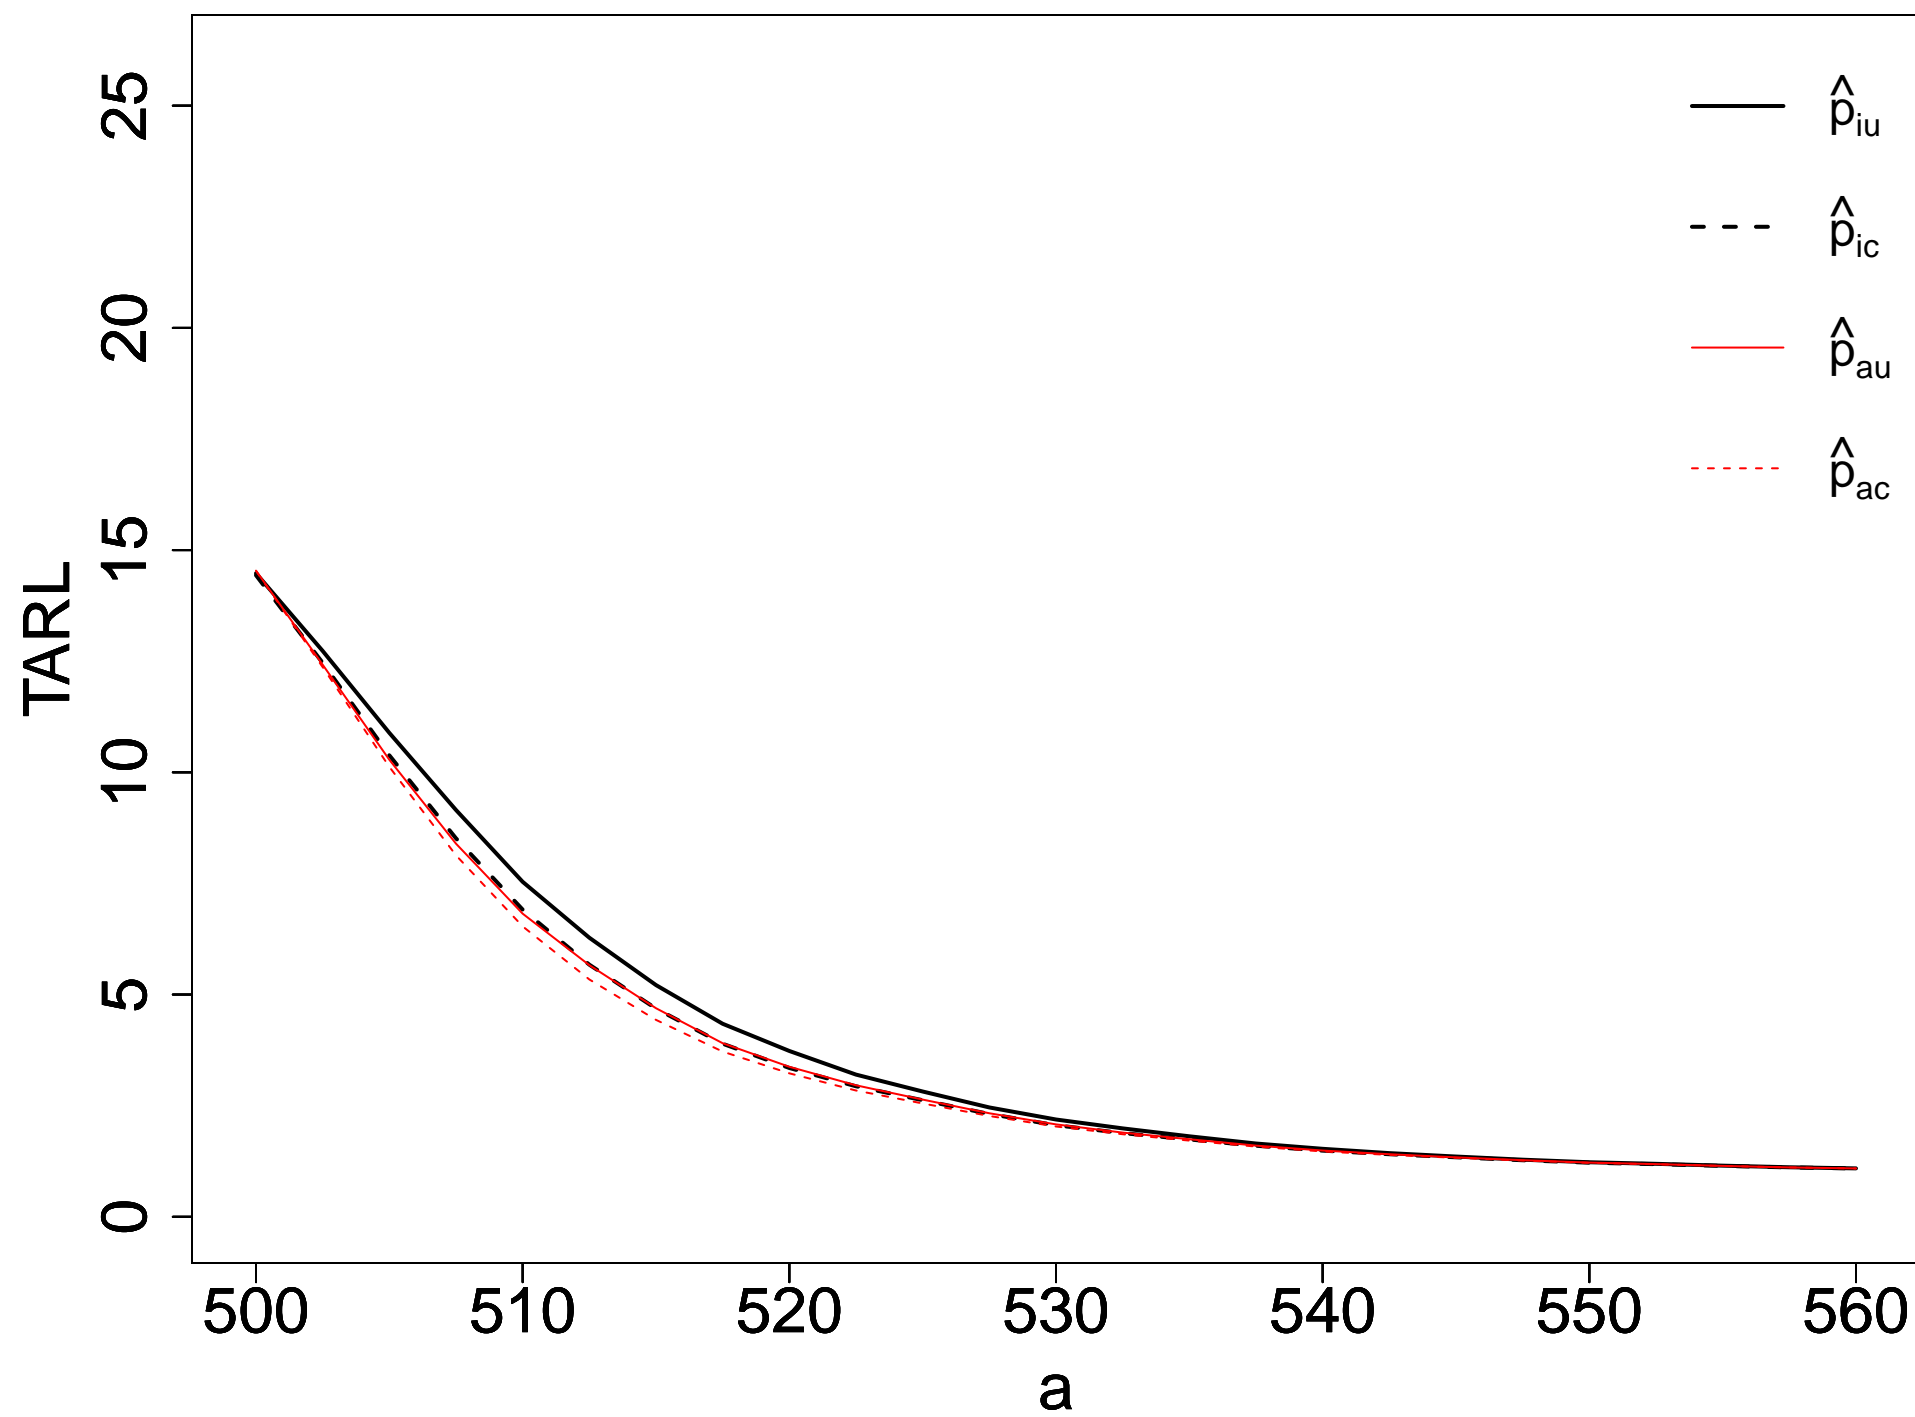

Supplement: Supplementary file 20 [file 1]

TARL curves for N=25, FAR=0.001

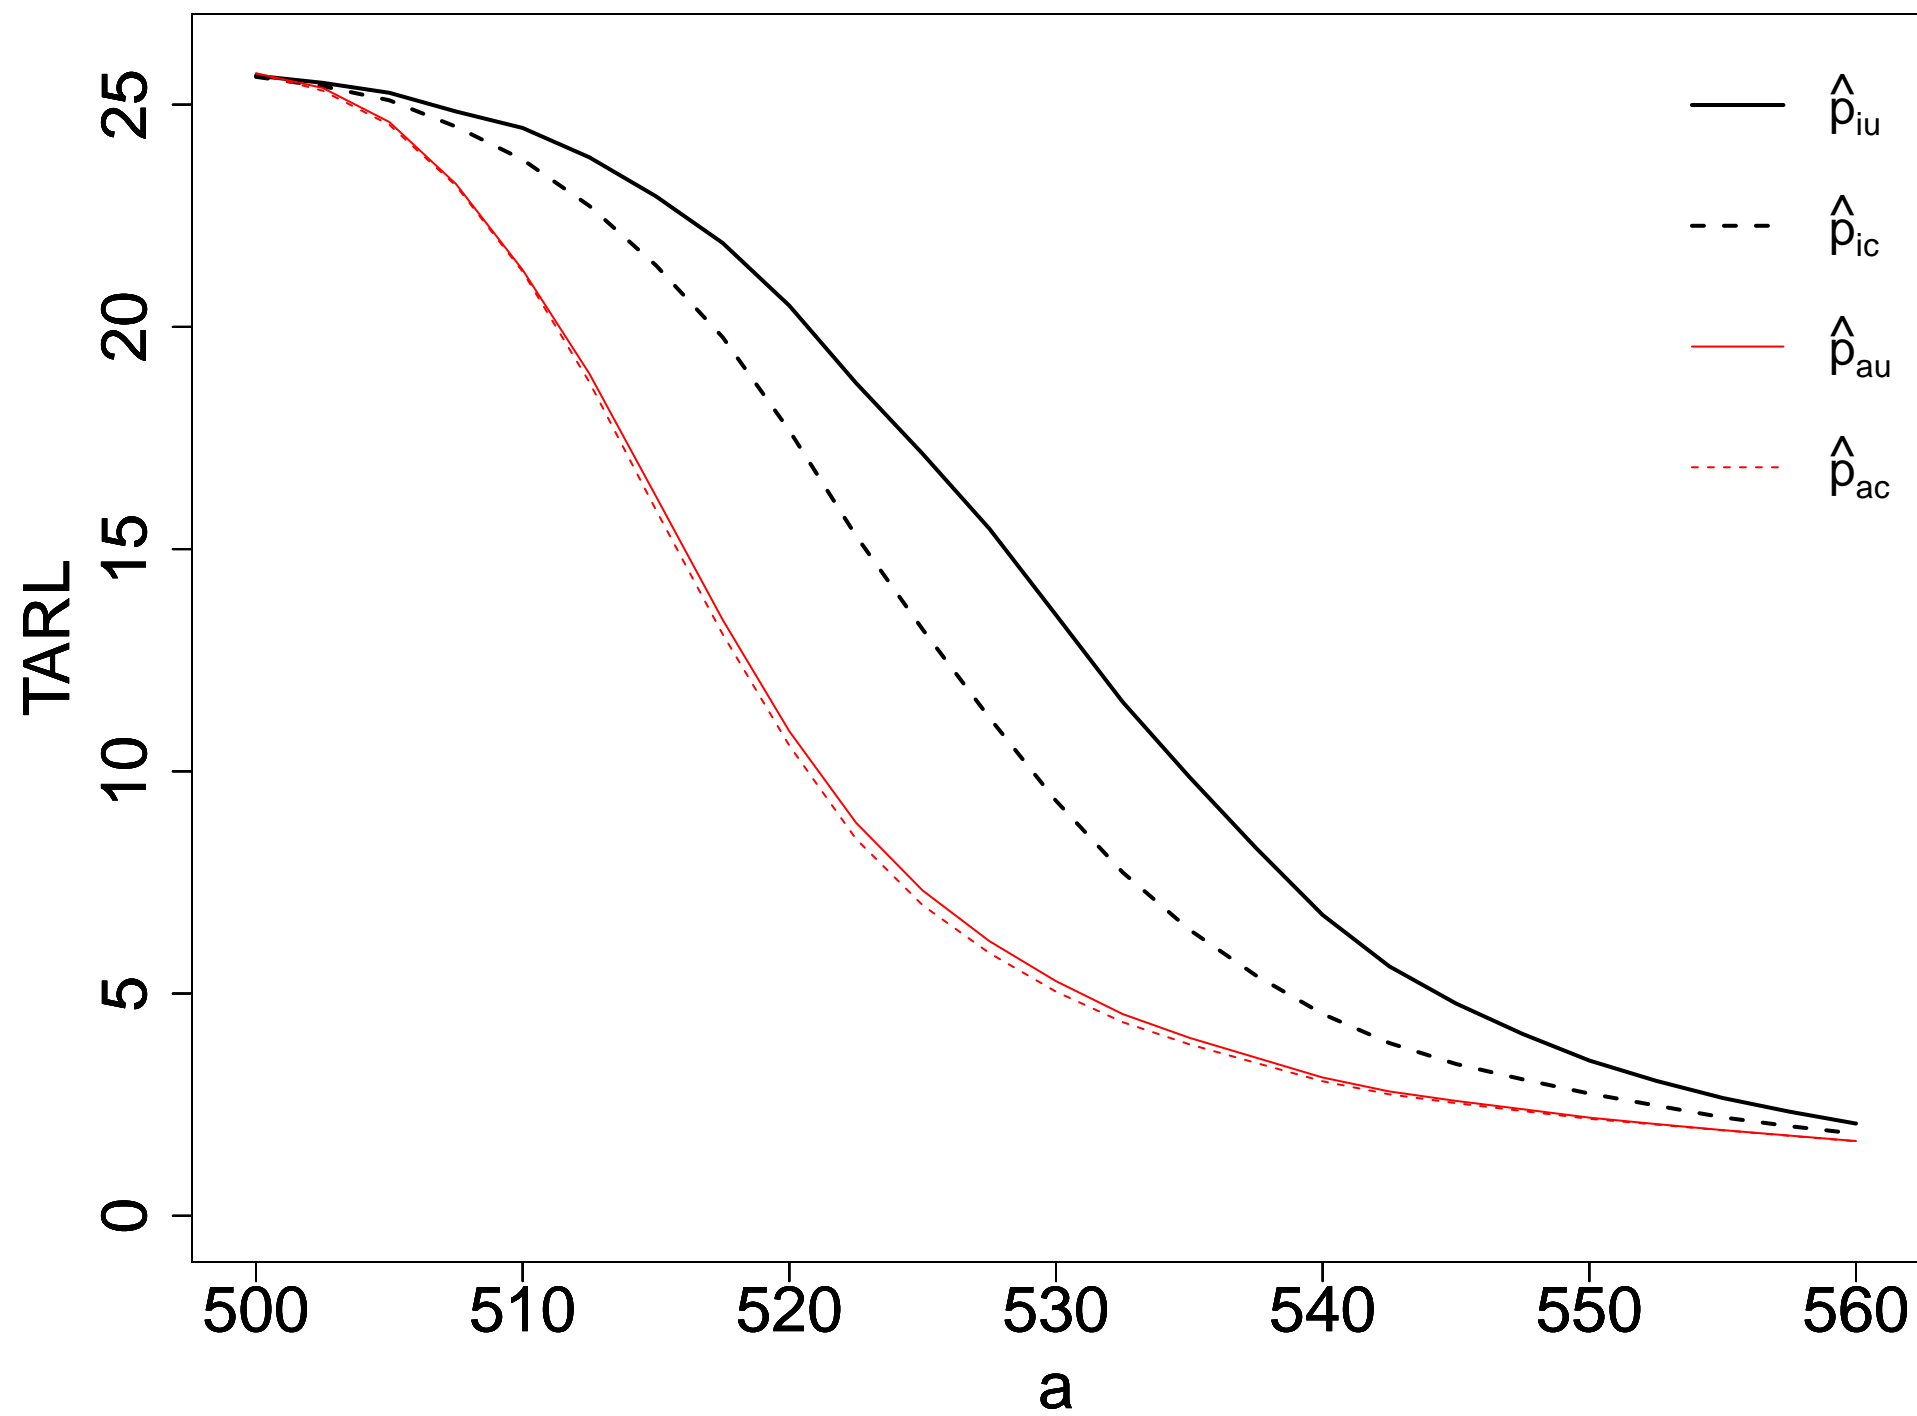

Supplement: Supplementary file 21 [file 1]

TARL curves for N=25, FAR=0.01

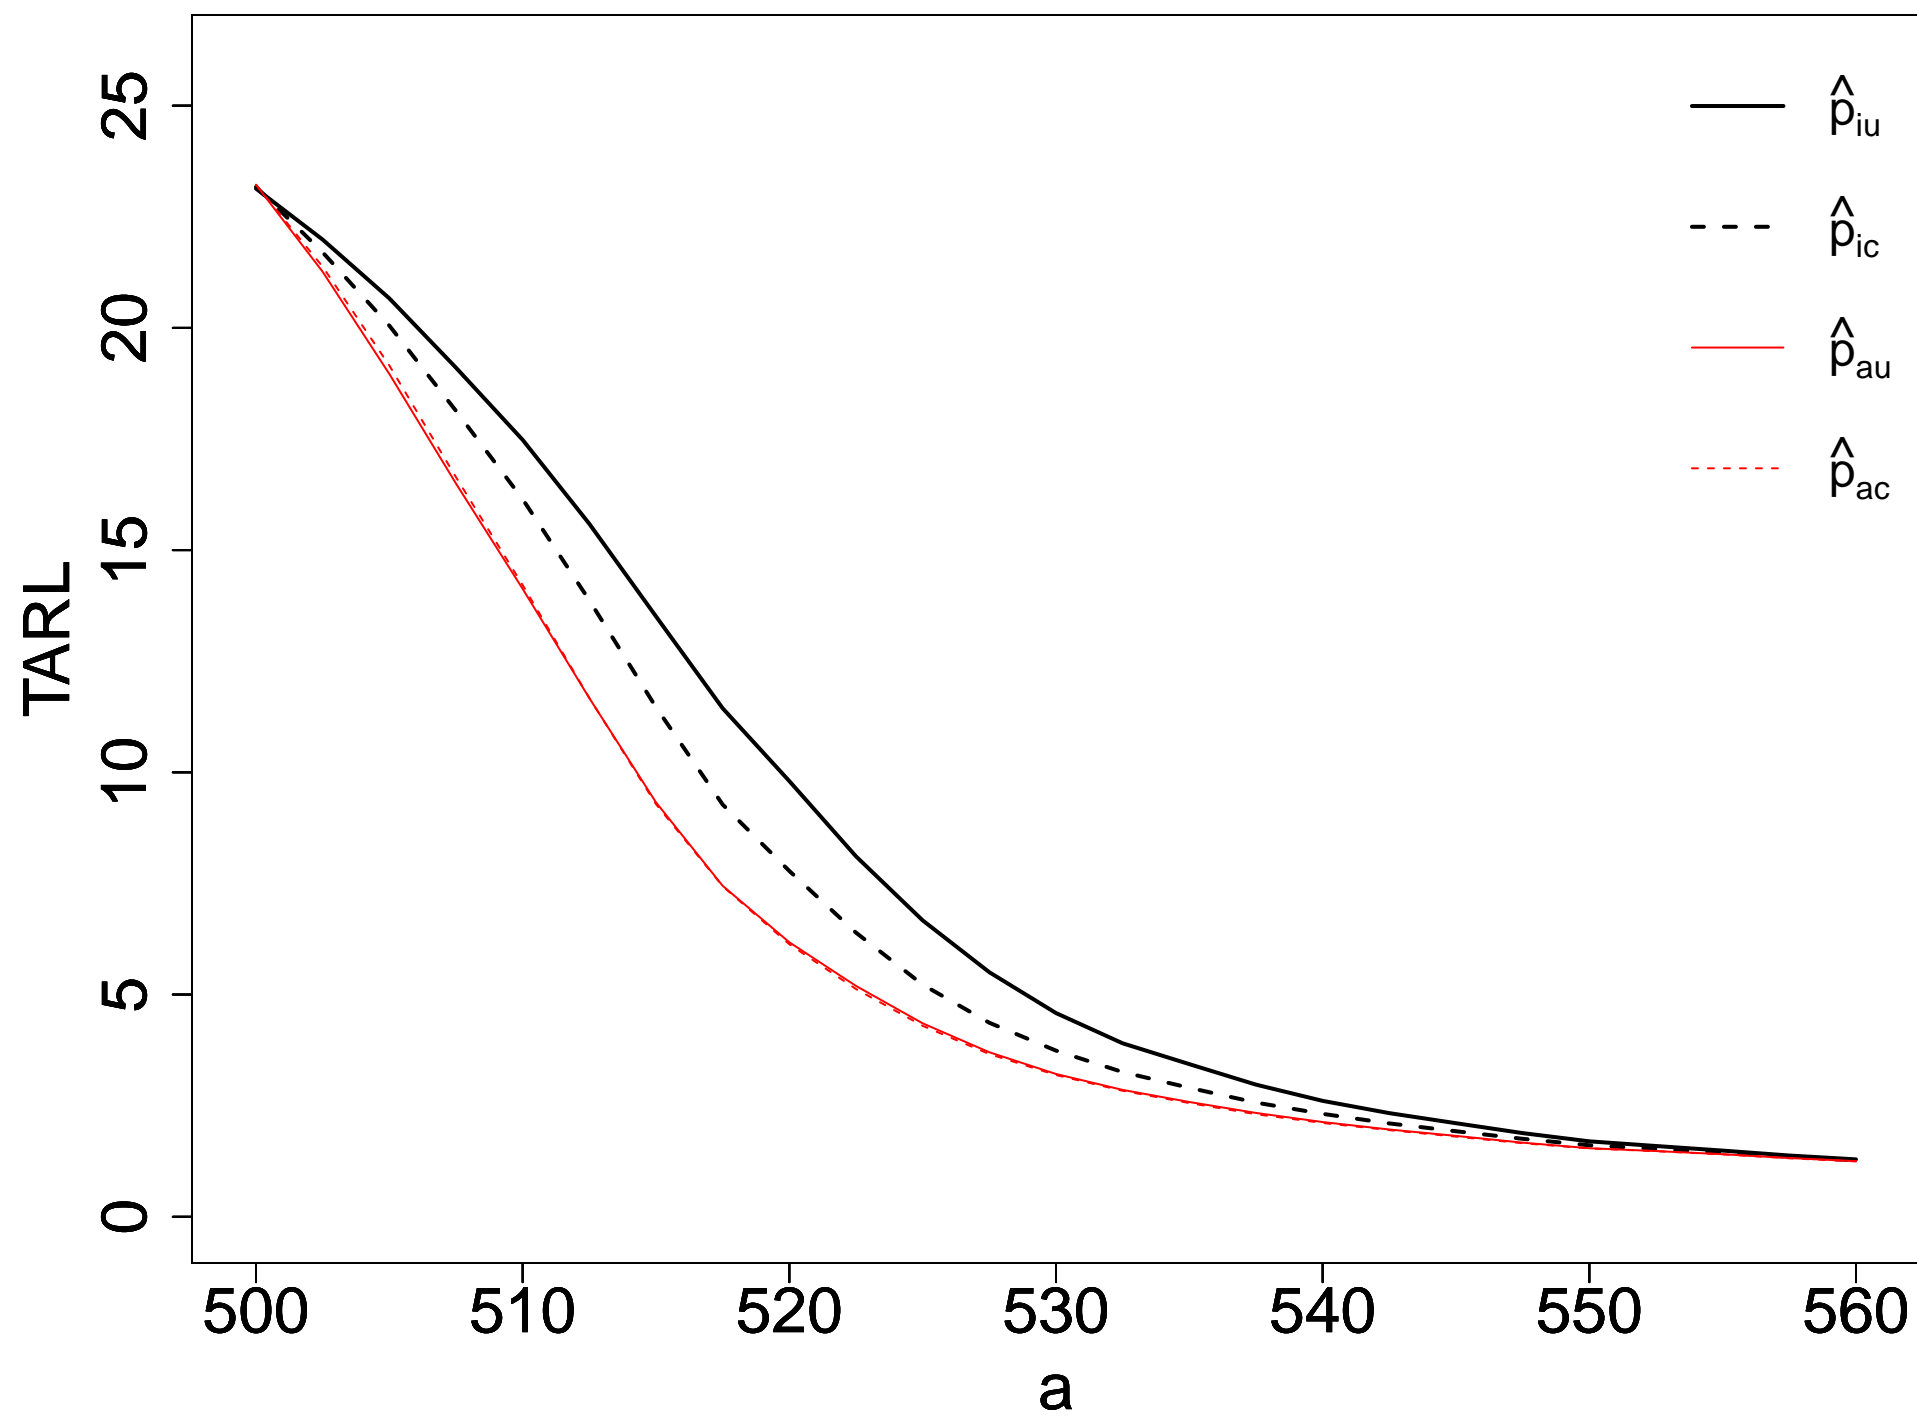

Supplement: Supplementary file 22 [file 1]

TARL curves for N=30, FAR=0.01

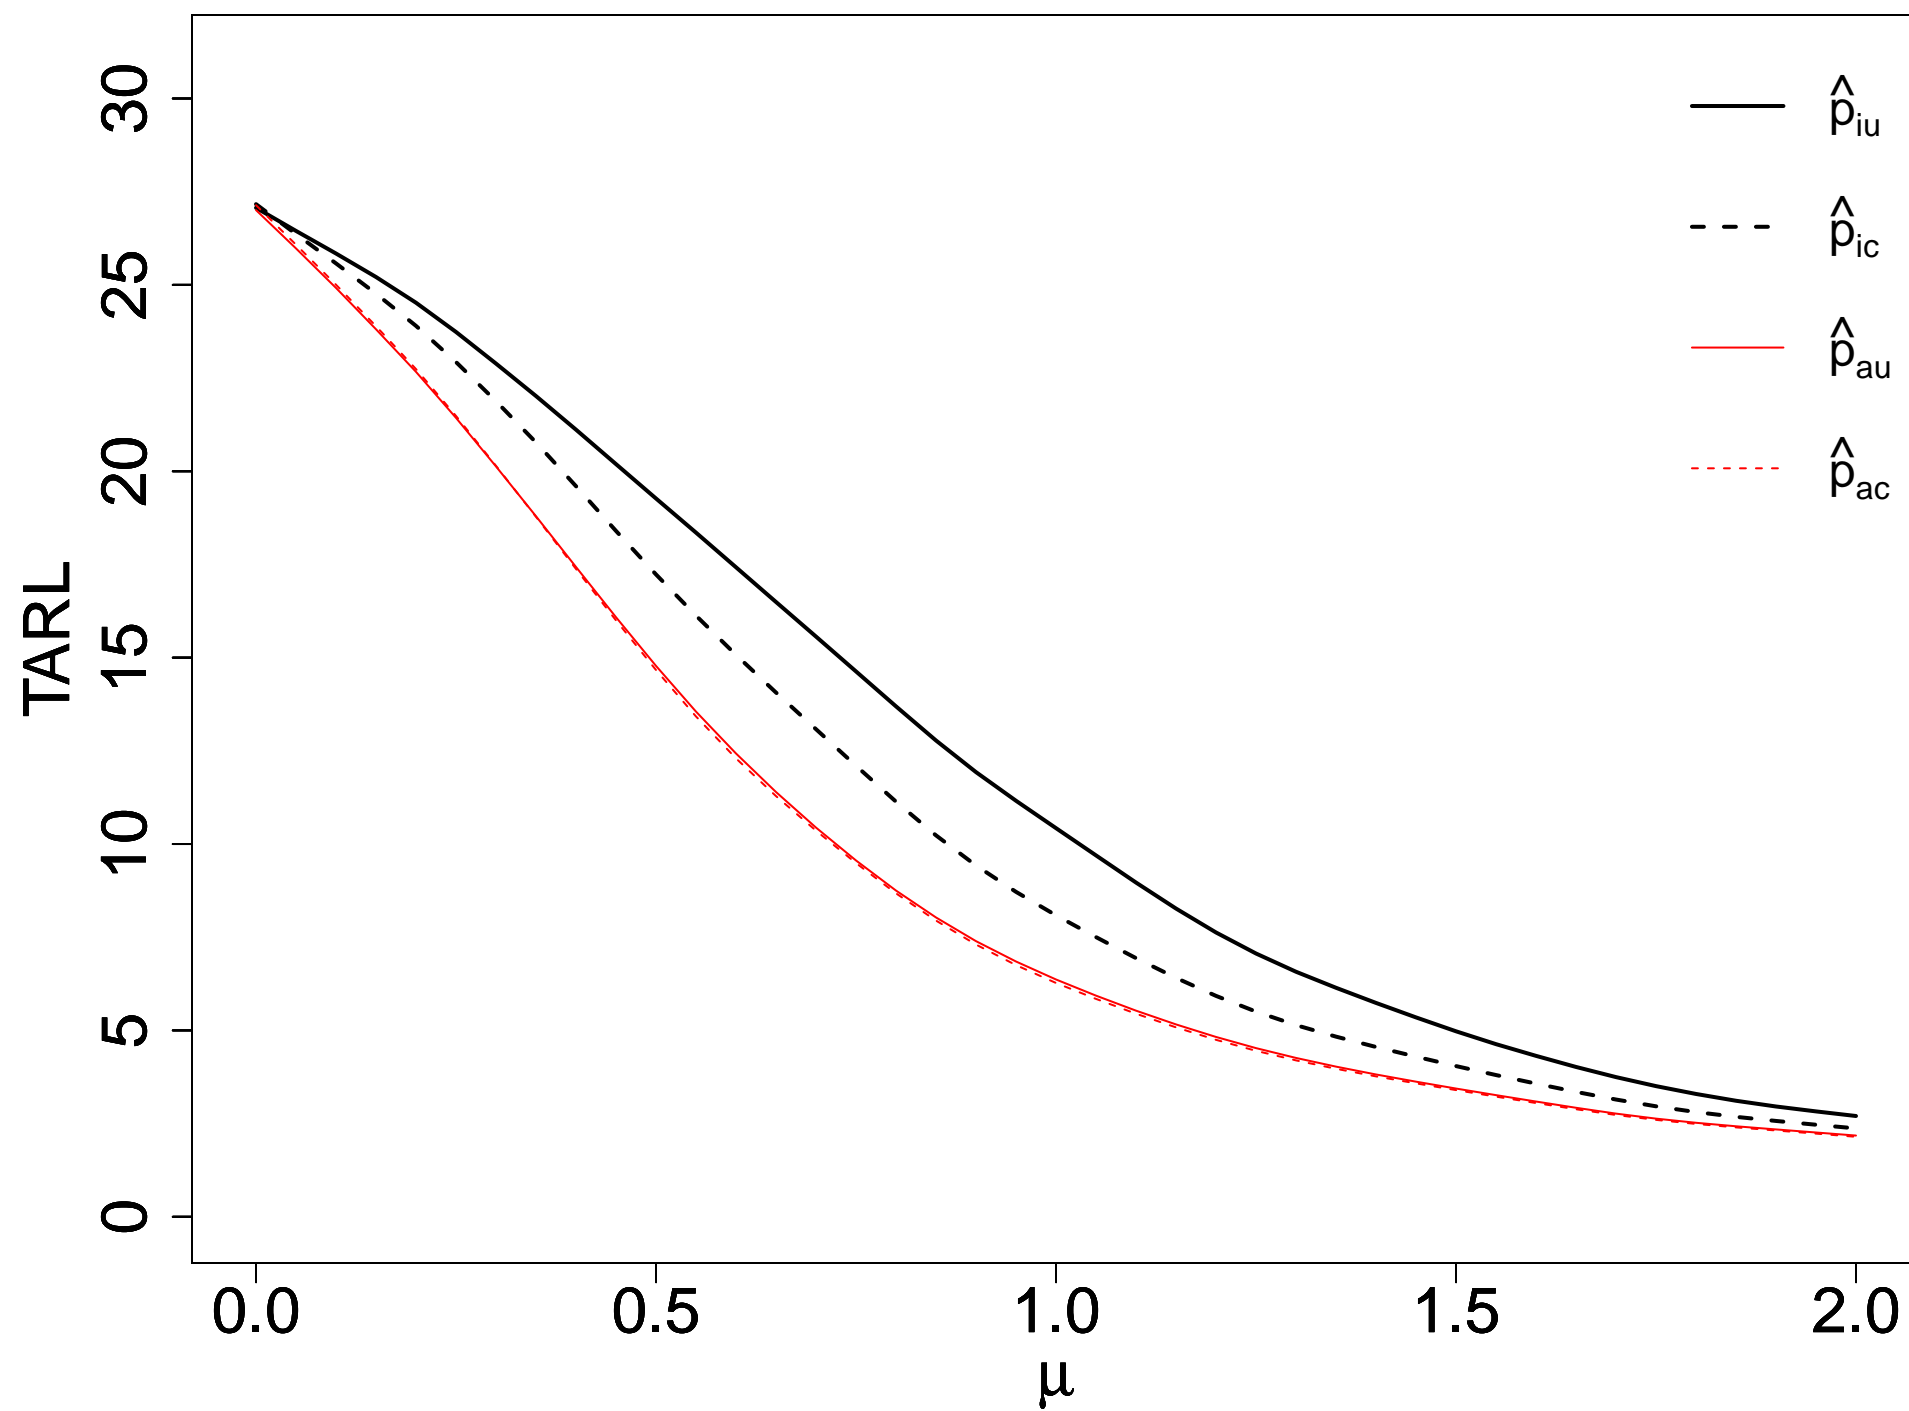

Supplement: Supplementary file 23 [file 1]

TARL curves for N=25, FAR=0.05

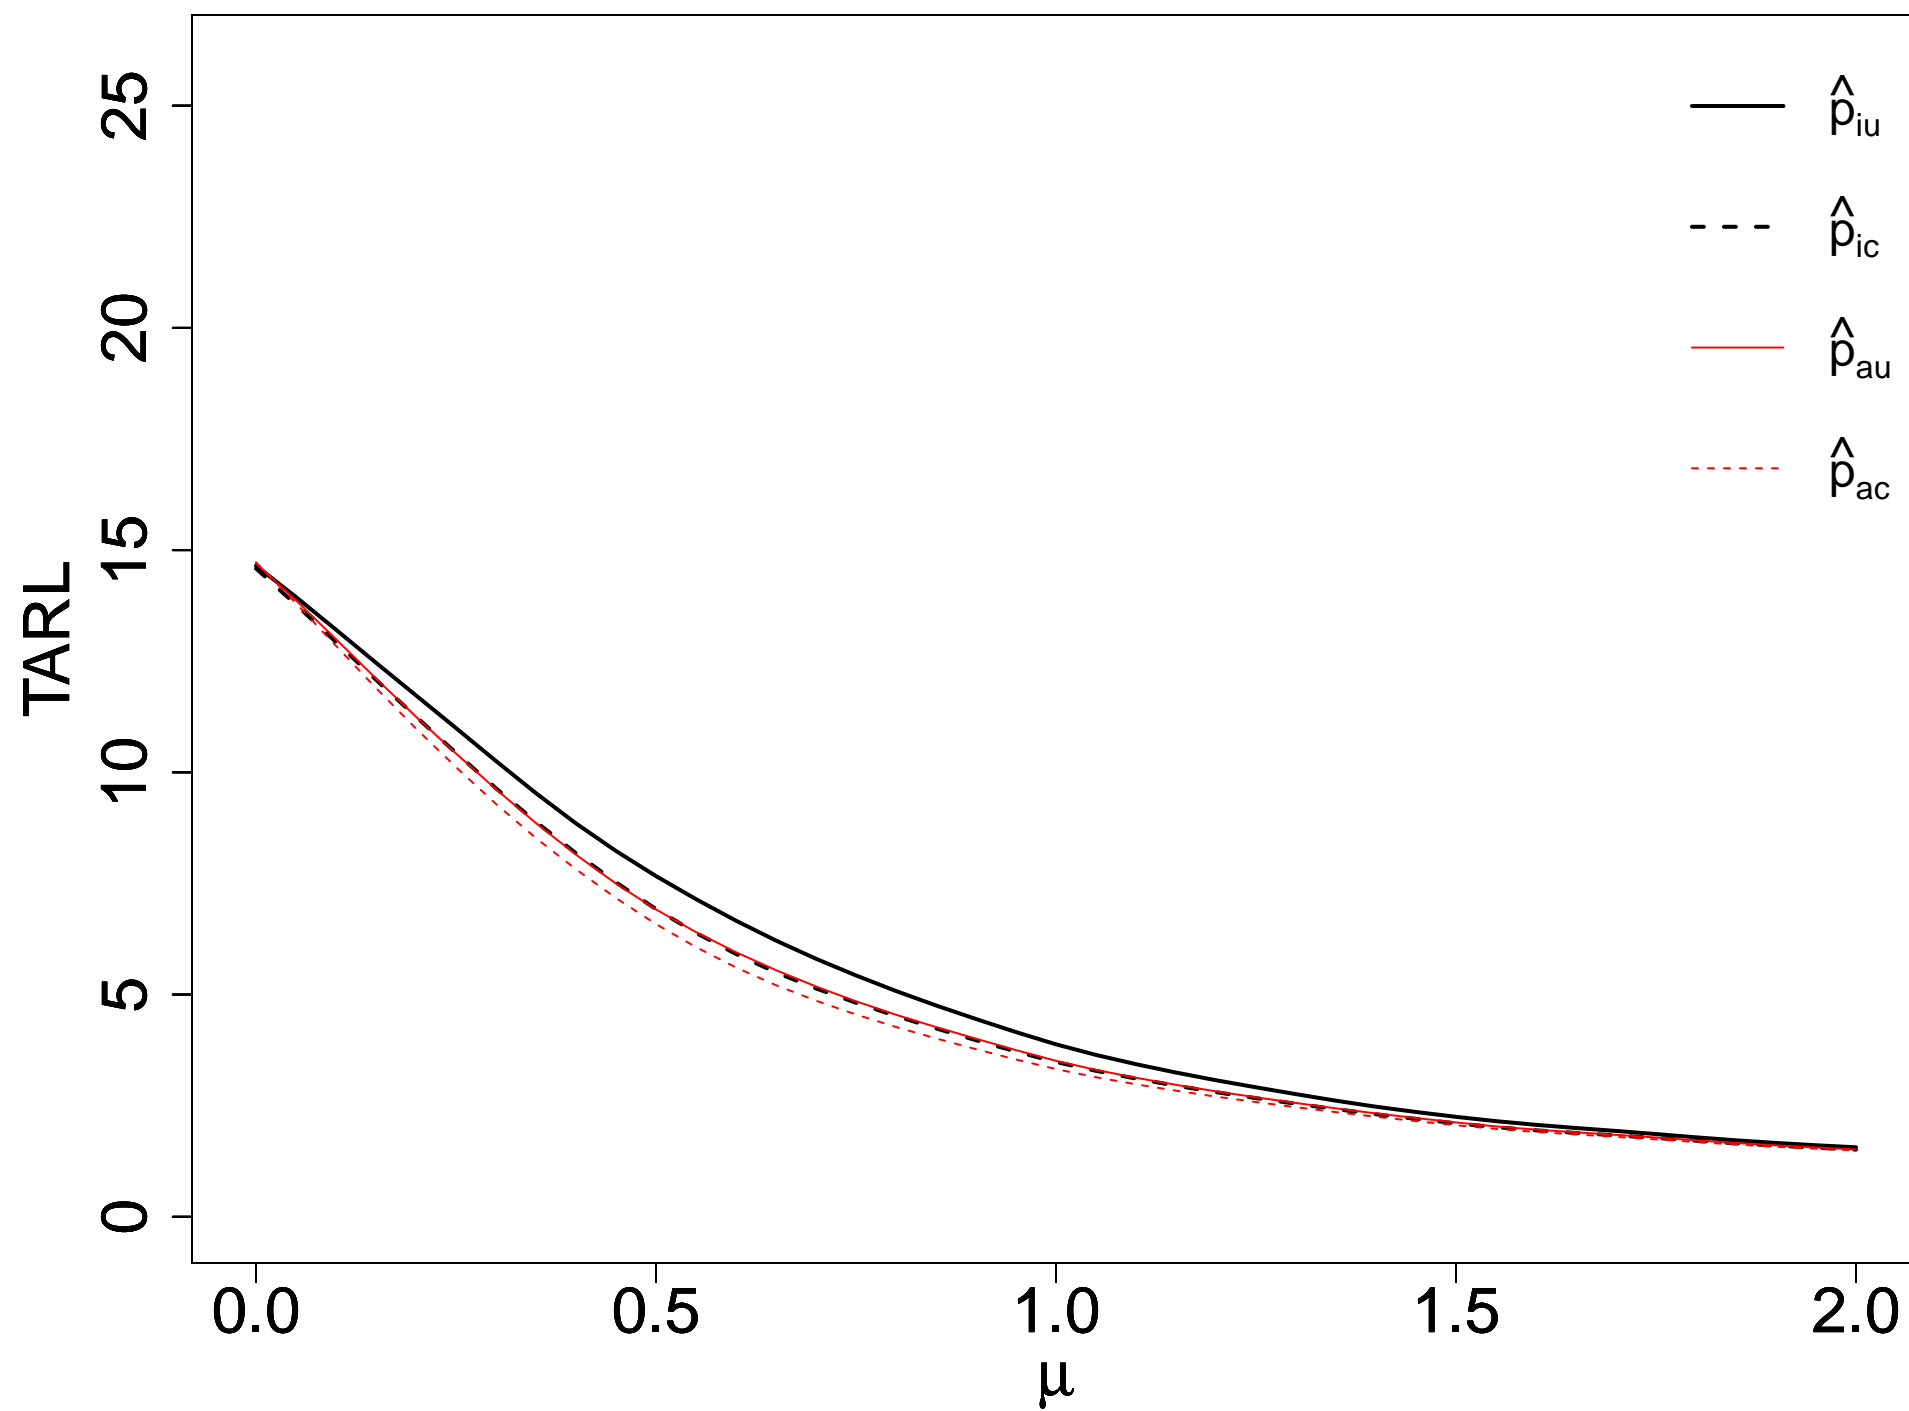

Supplement: Supplementary file 24 [file 1]

q curves for N=15, FAR=0.05

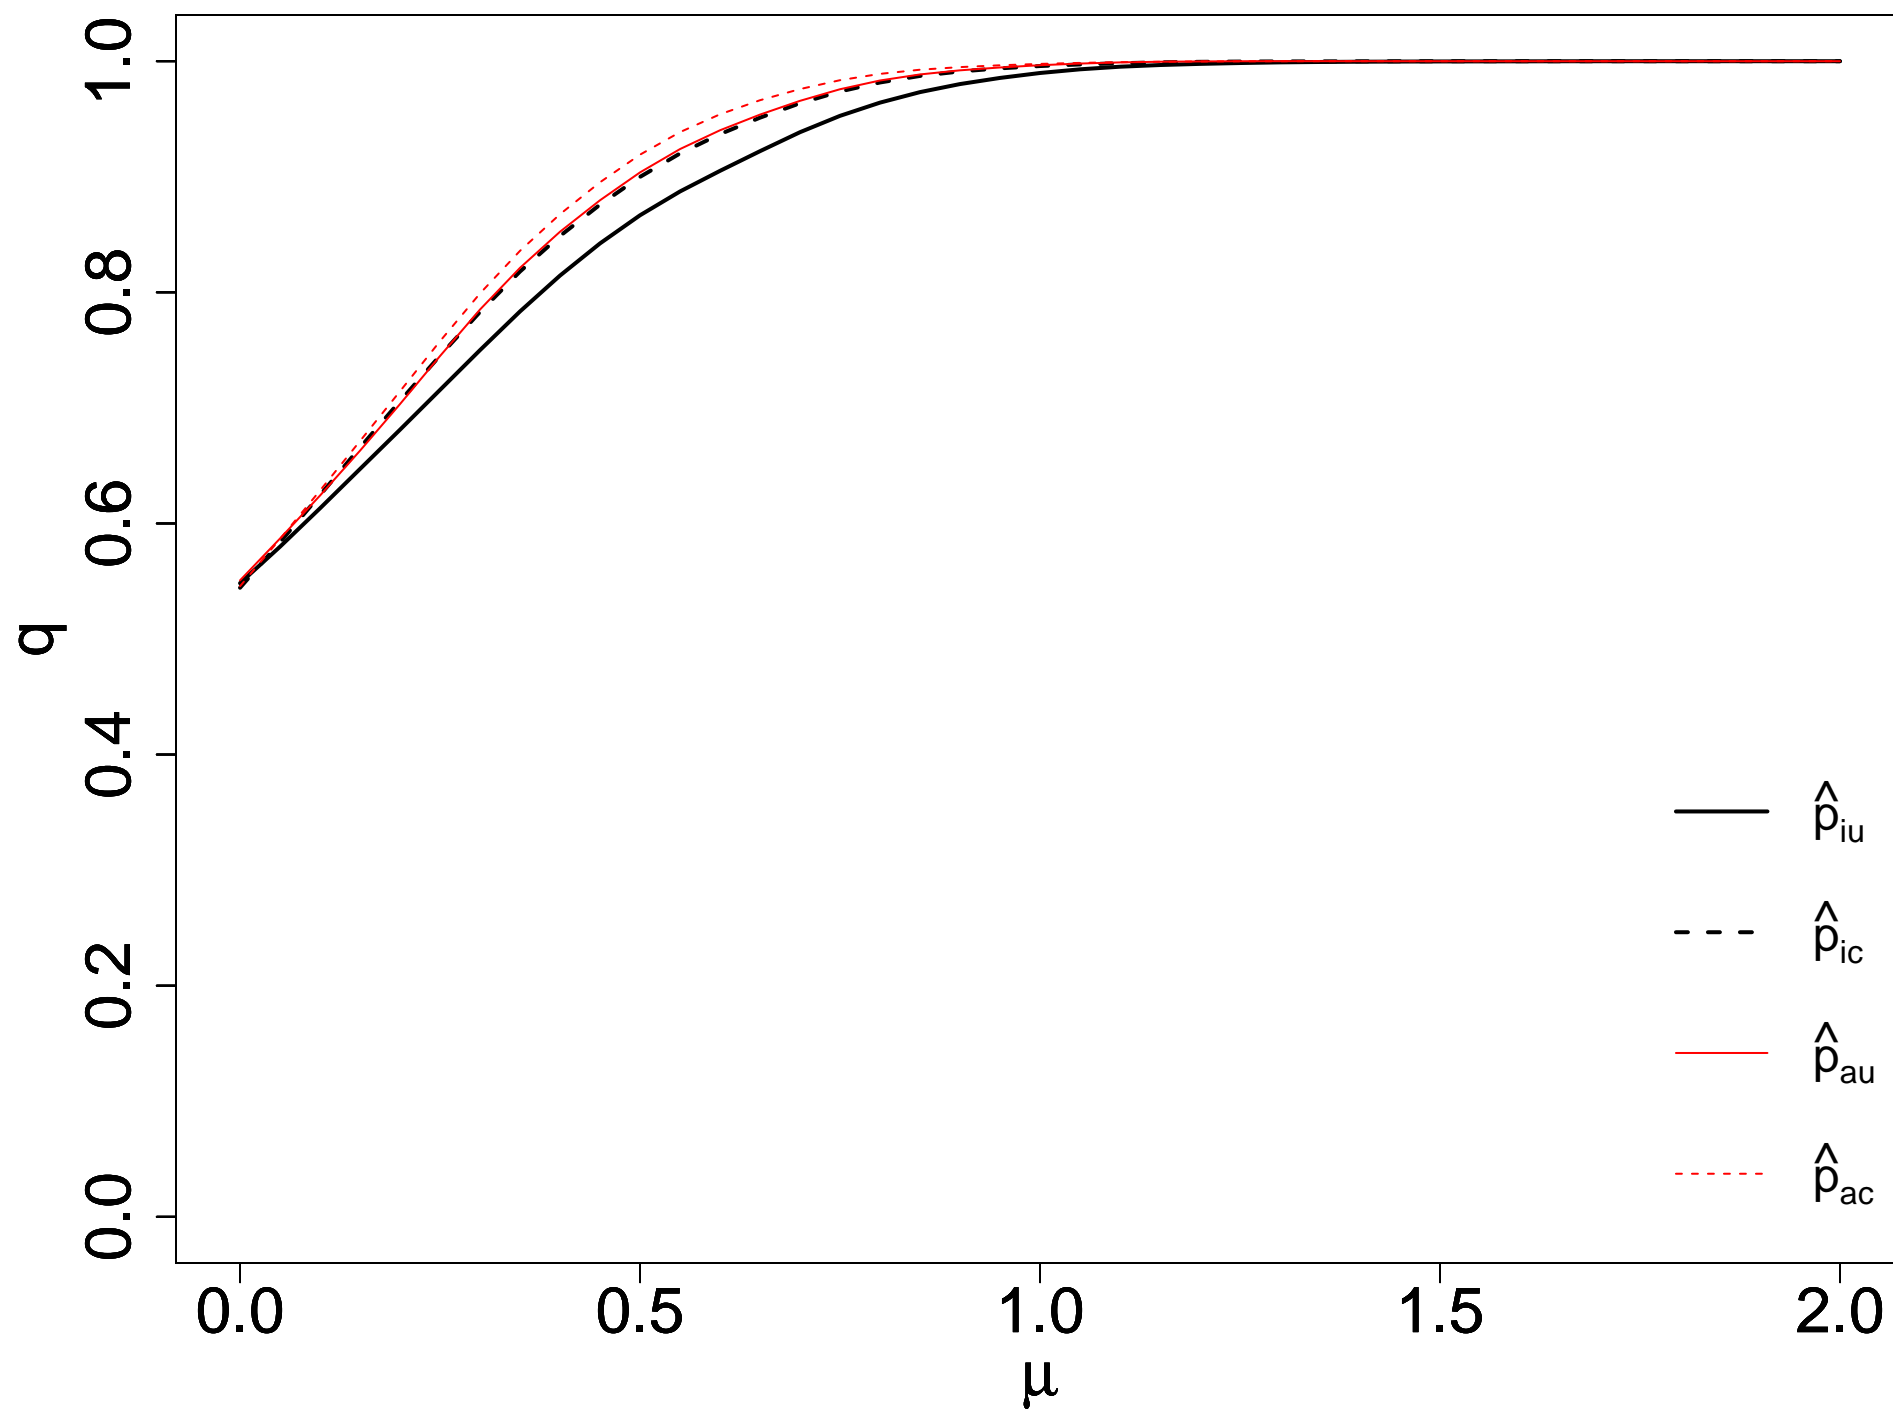

Supplement: Supplementary file 25 [file 1]

q curves for N=30, FAR=0.001

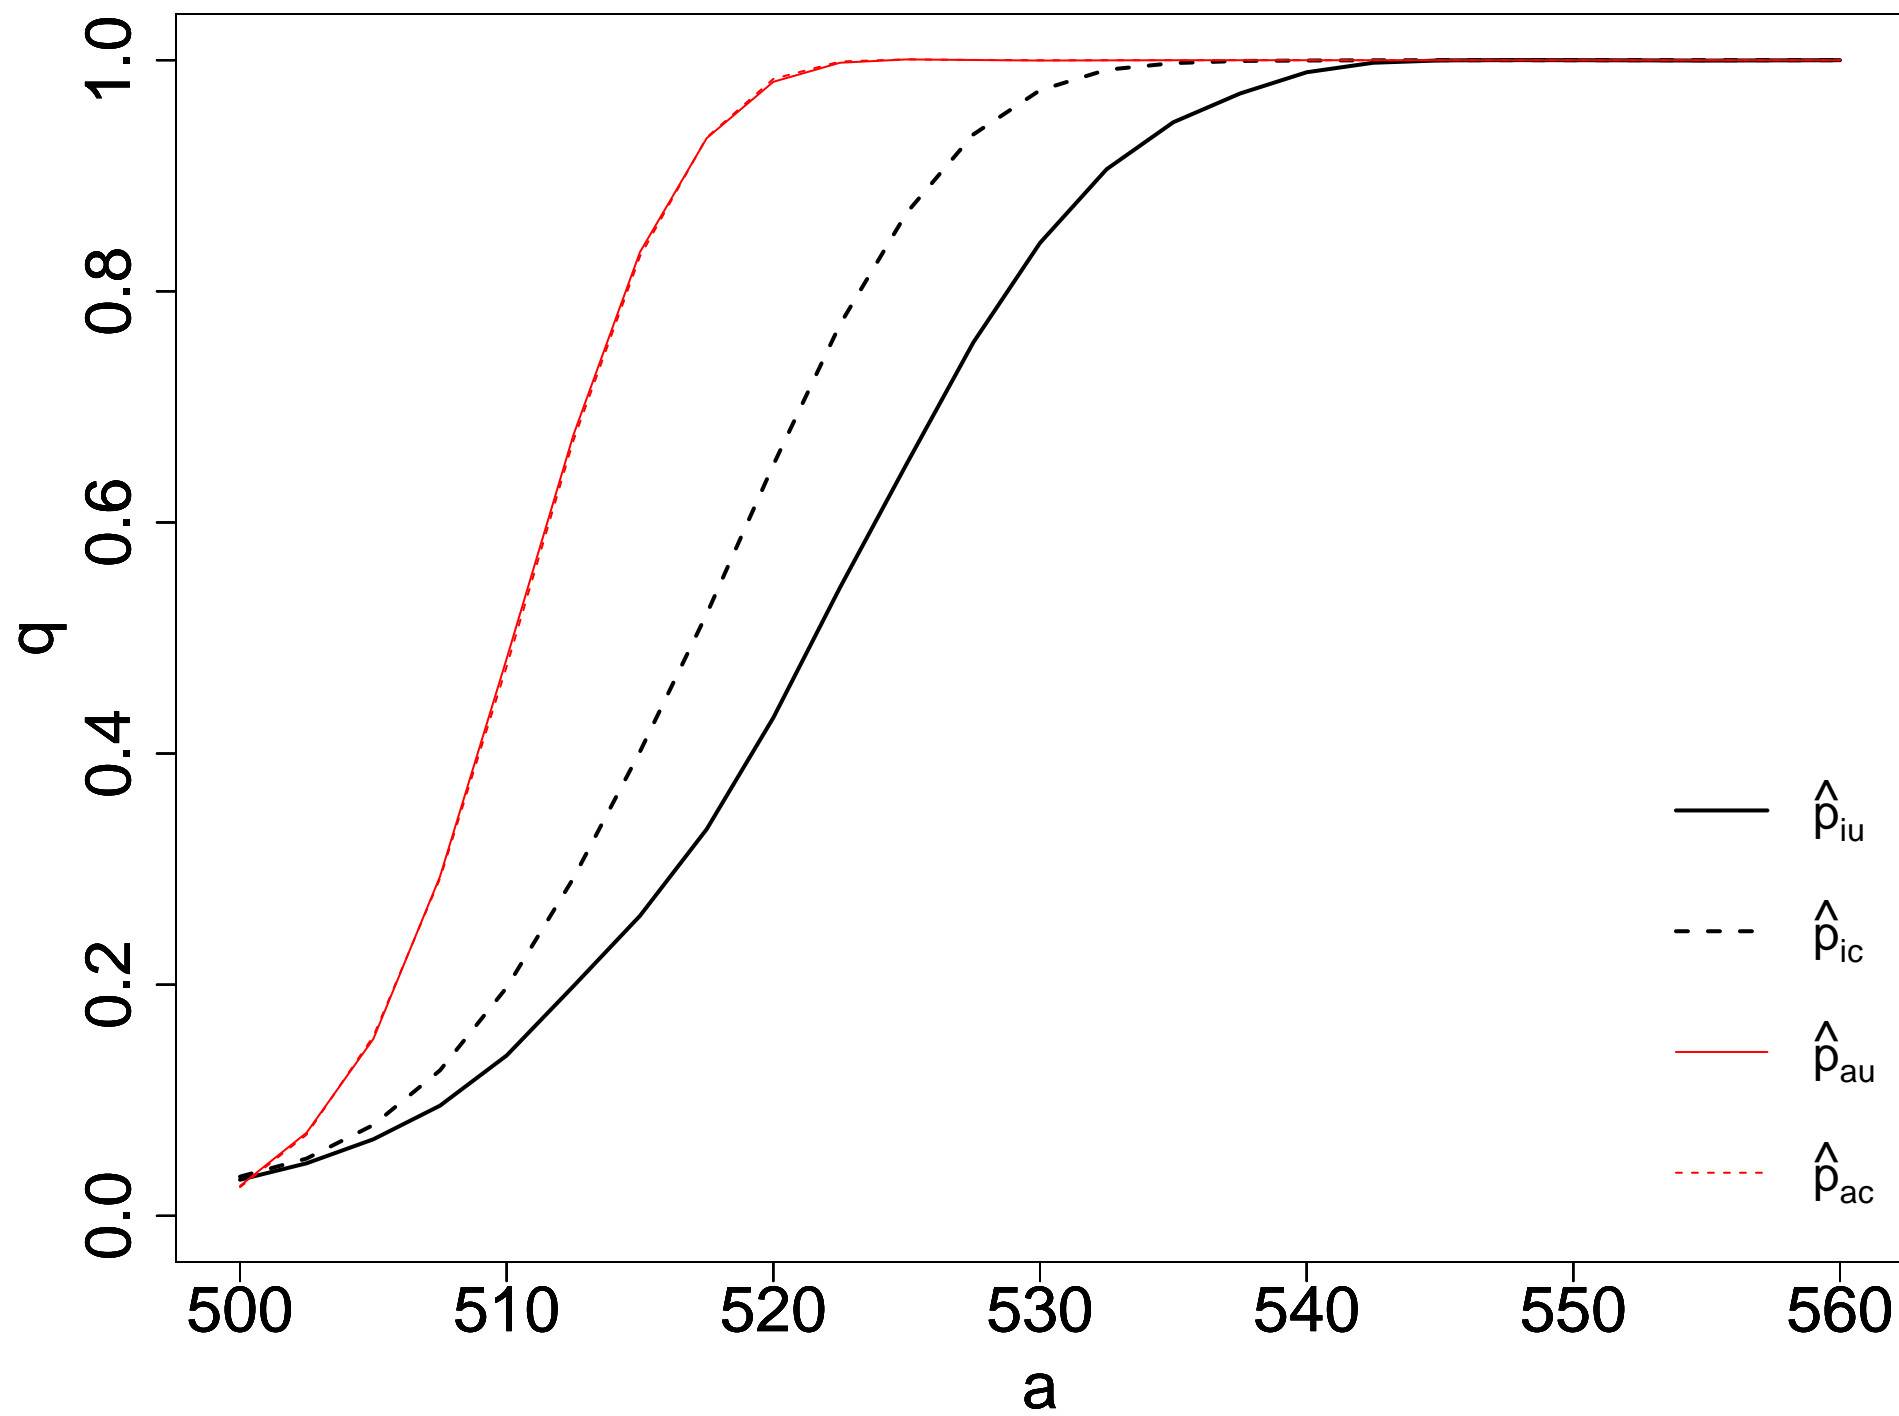

Supplement: Supplementary file 26 [file 1]

TARL curves for N=15, FAR=0.01

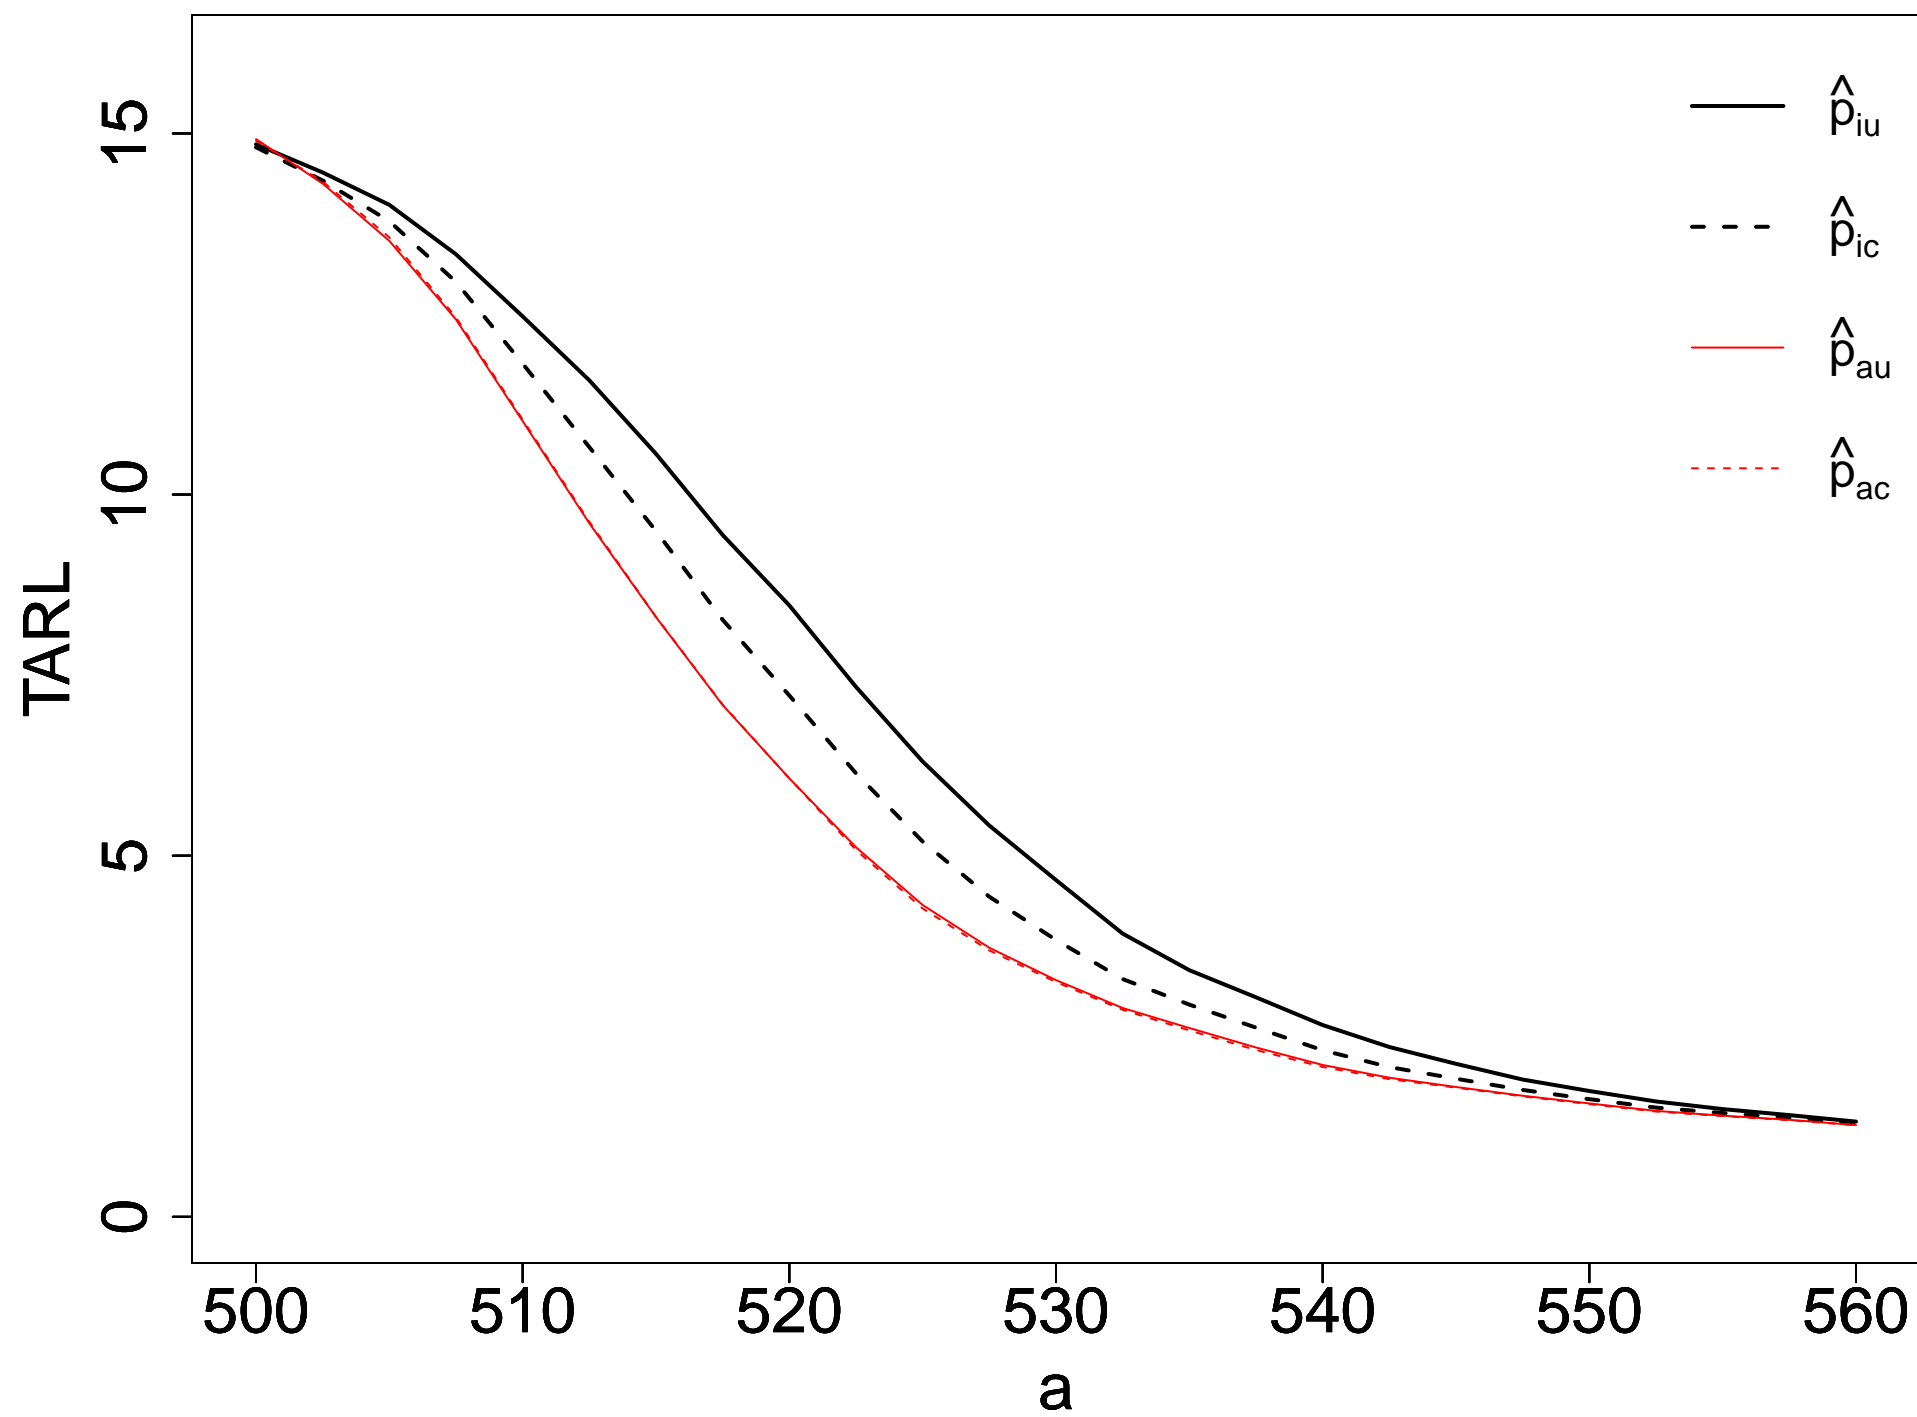

Supplement: Supplementary file 27 [file 1]

TARL curves for N=15, FAR=0.001

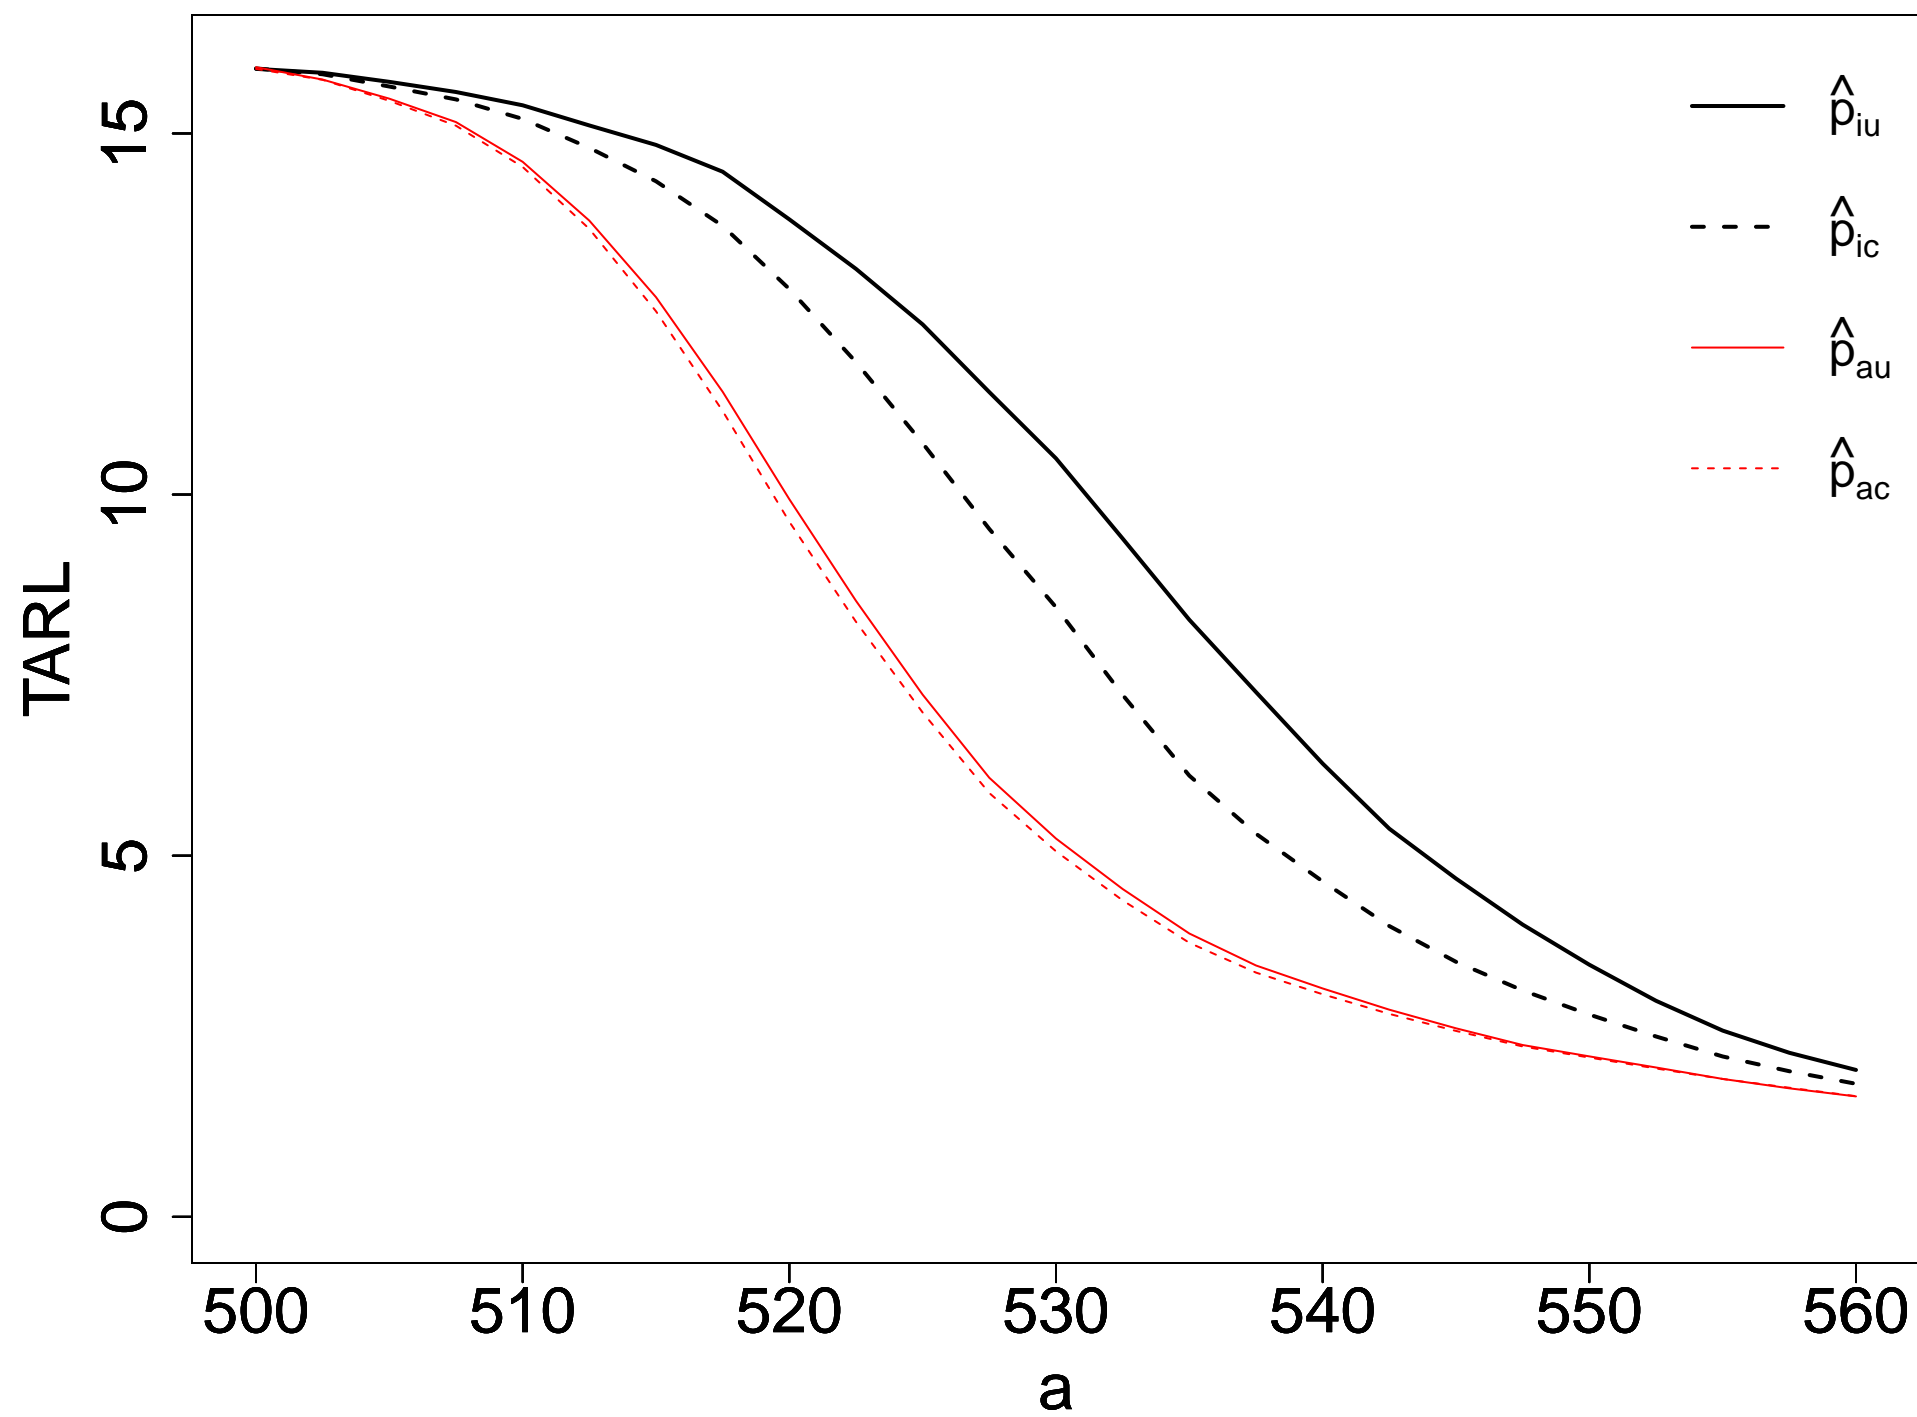

Supplement: Supplementary file 29 [file 1]

TARL curves for N=30, FAR=0.05

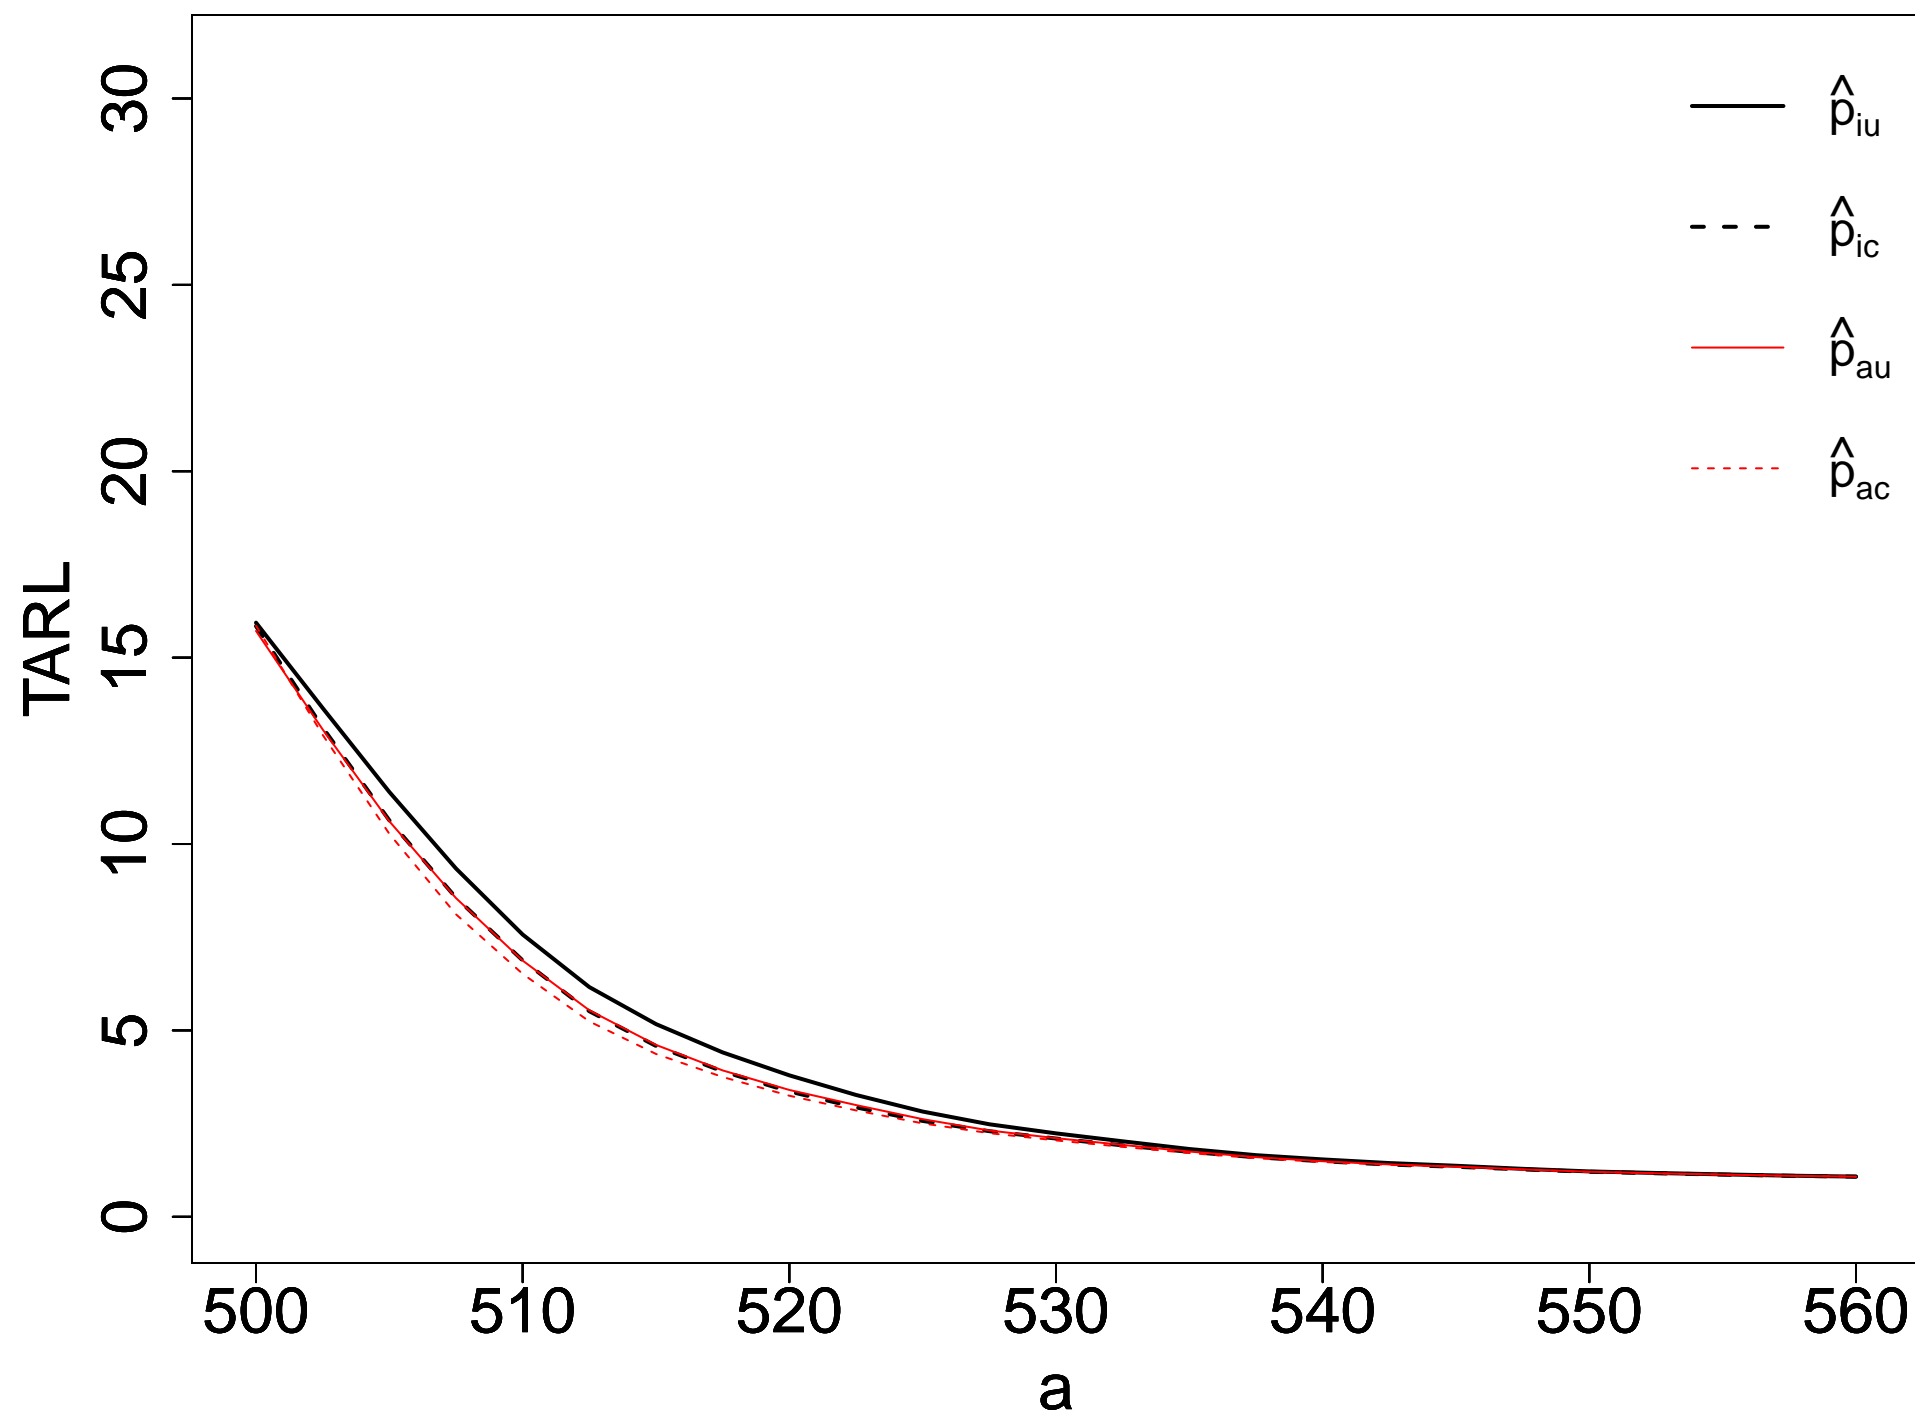

Supplement: Supplementary file 30 [file 1]

q curves for N=25, FAR=0.05

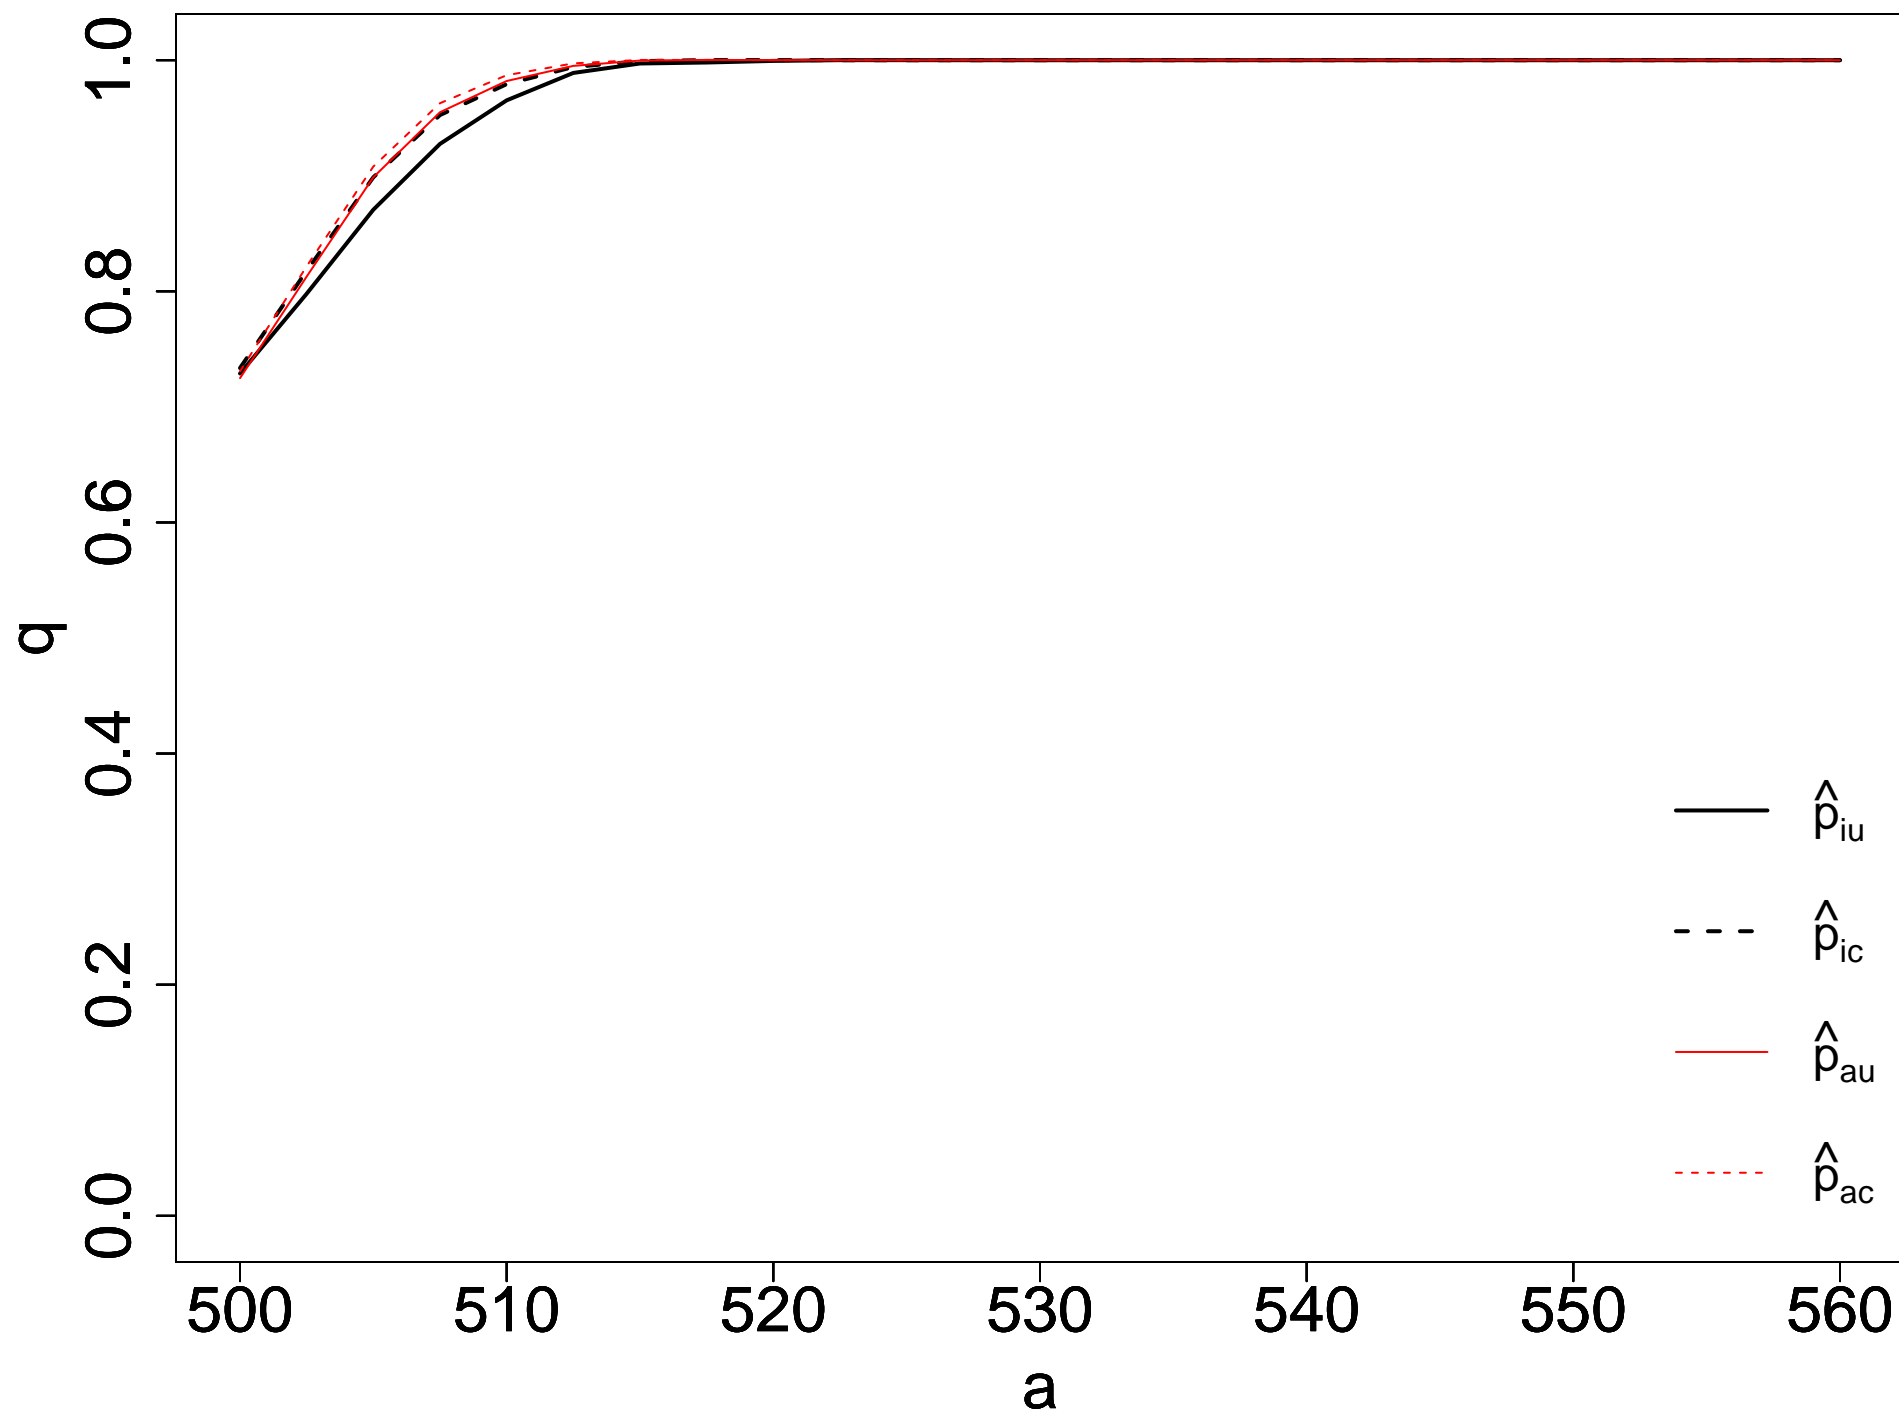

Supplement: Supplementary file 31 [file 1]

q curves for N=15, FAR=0.001

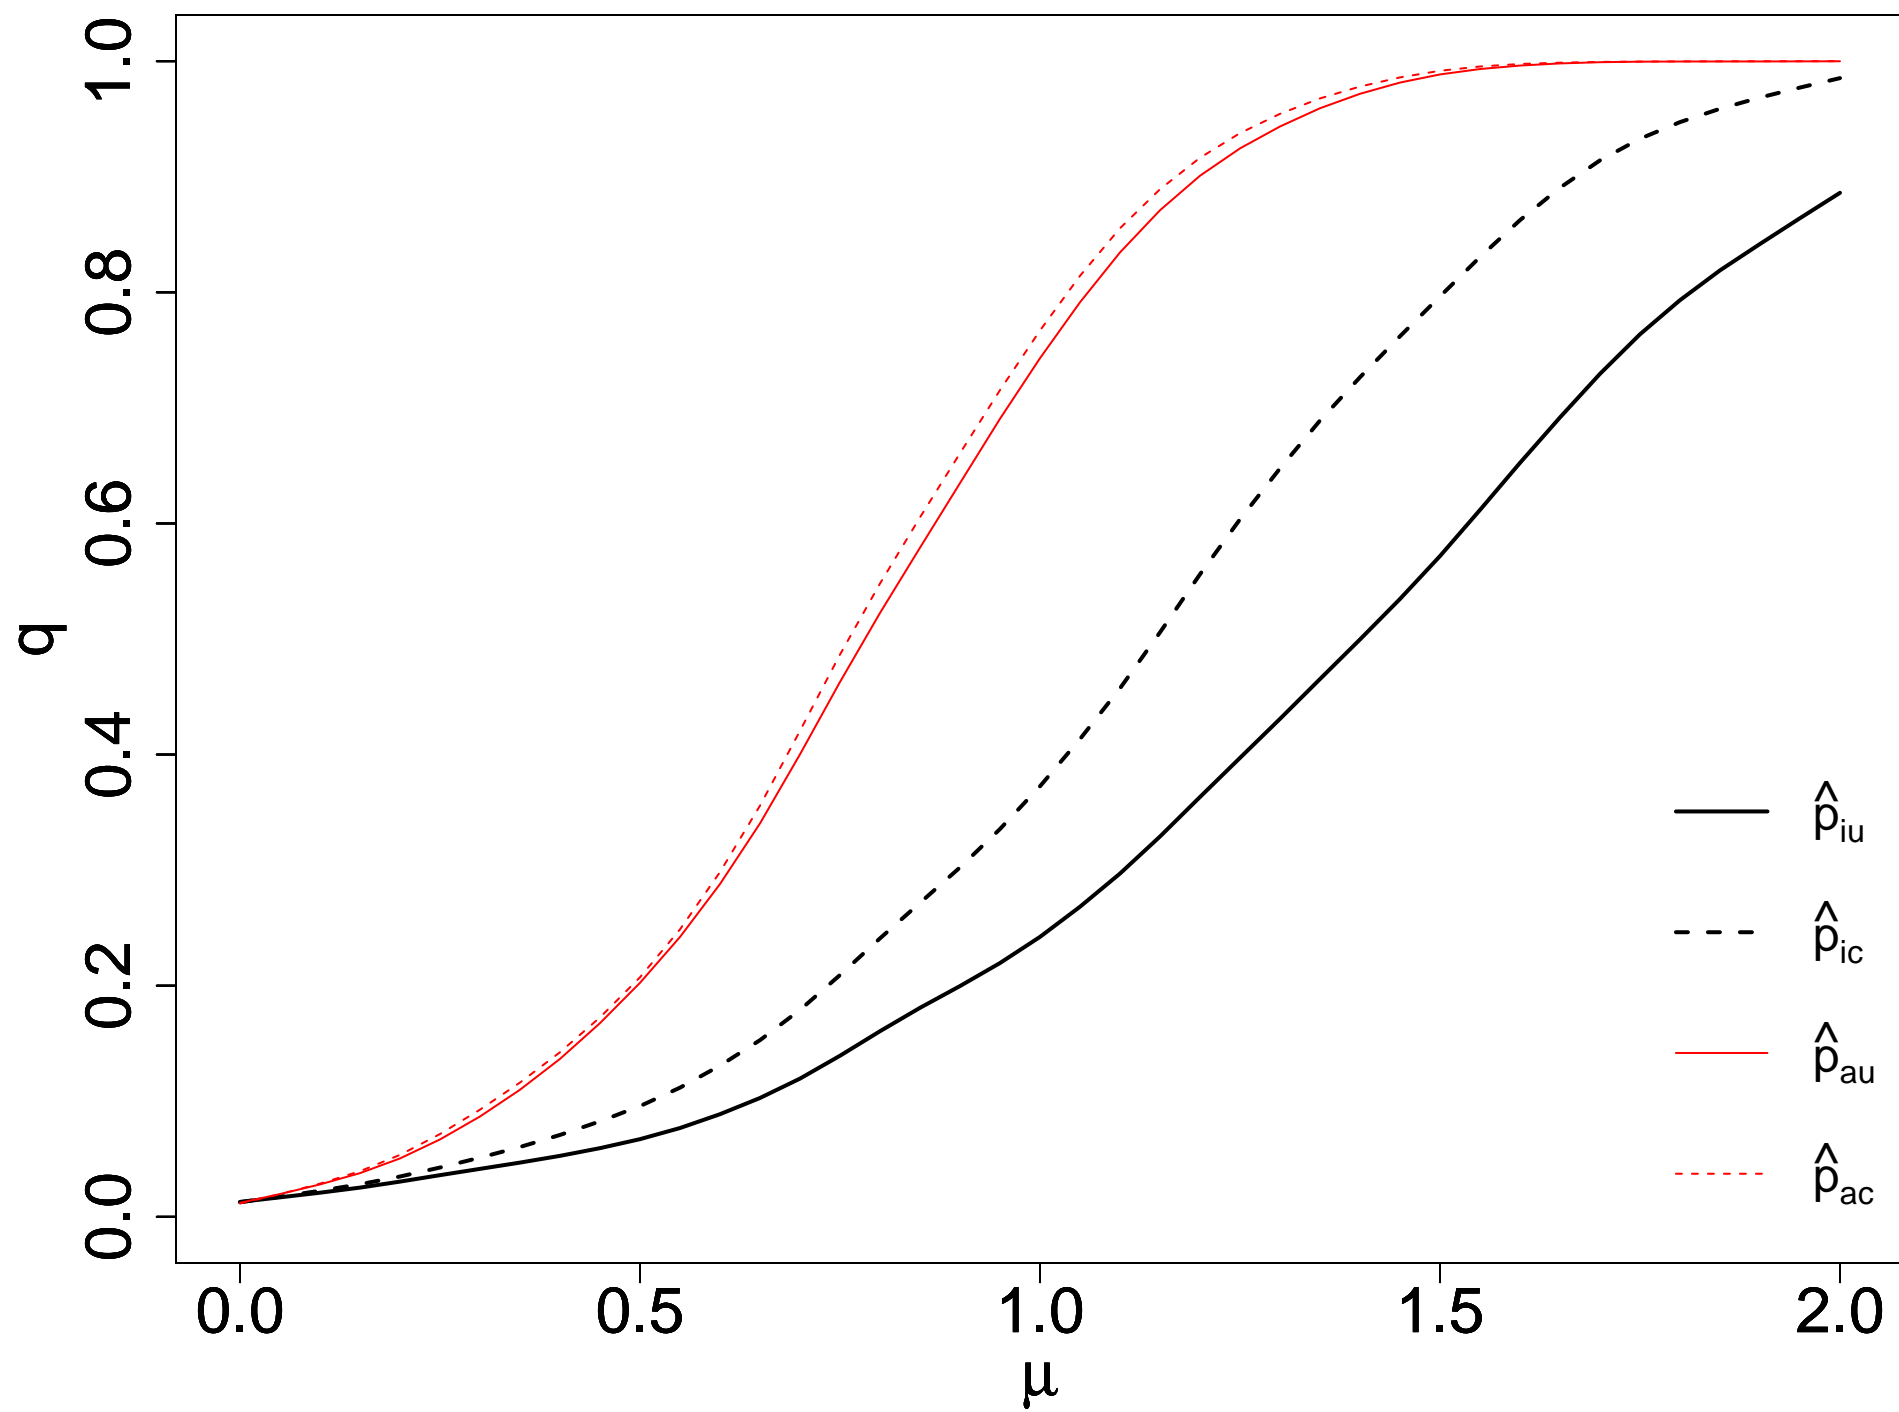

Supplement: Supplementary file 32 [file 1]

TARL curves for N=30, FAR=0.001

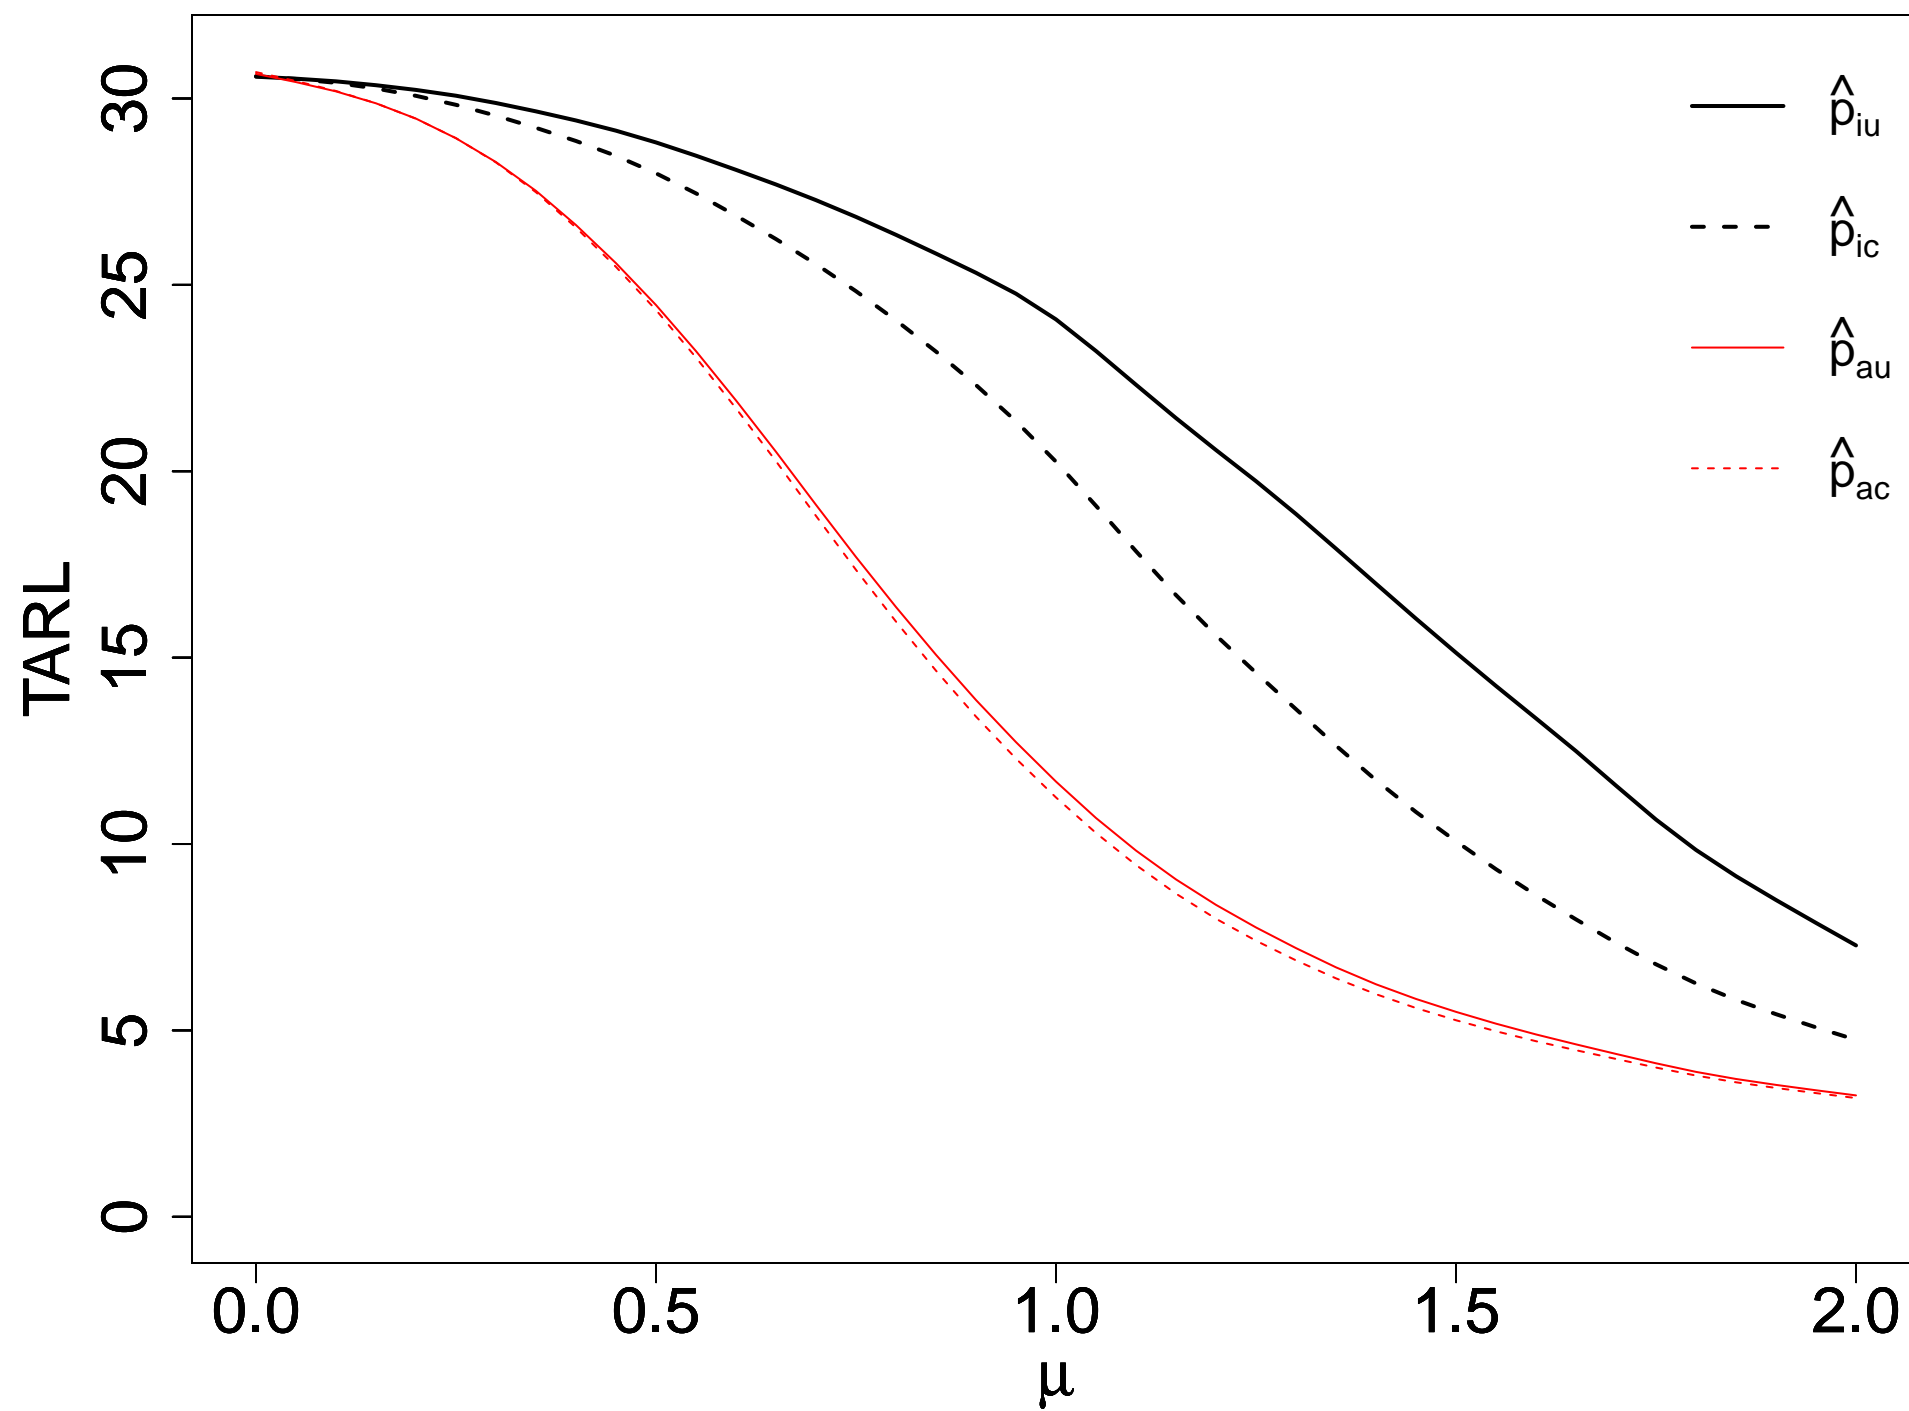

Supplement: Supplementary file 33 [file 1]

q curves for N=15, FAR=0.01

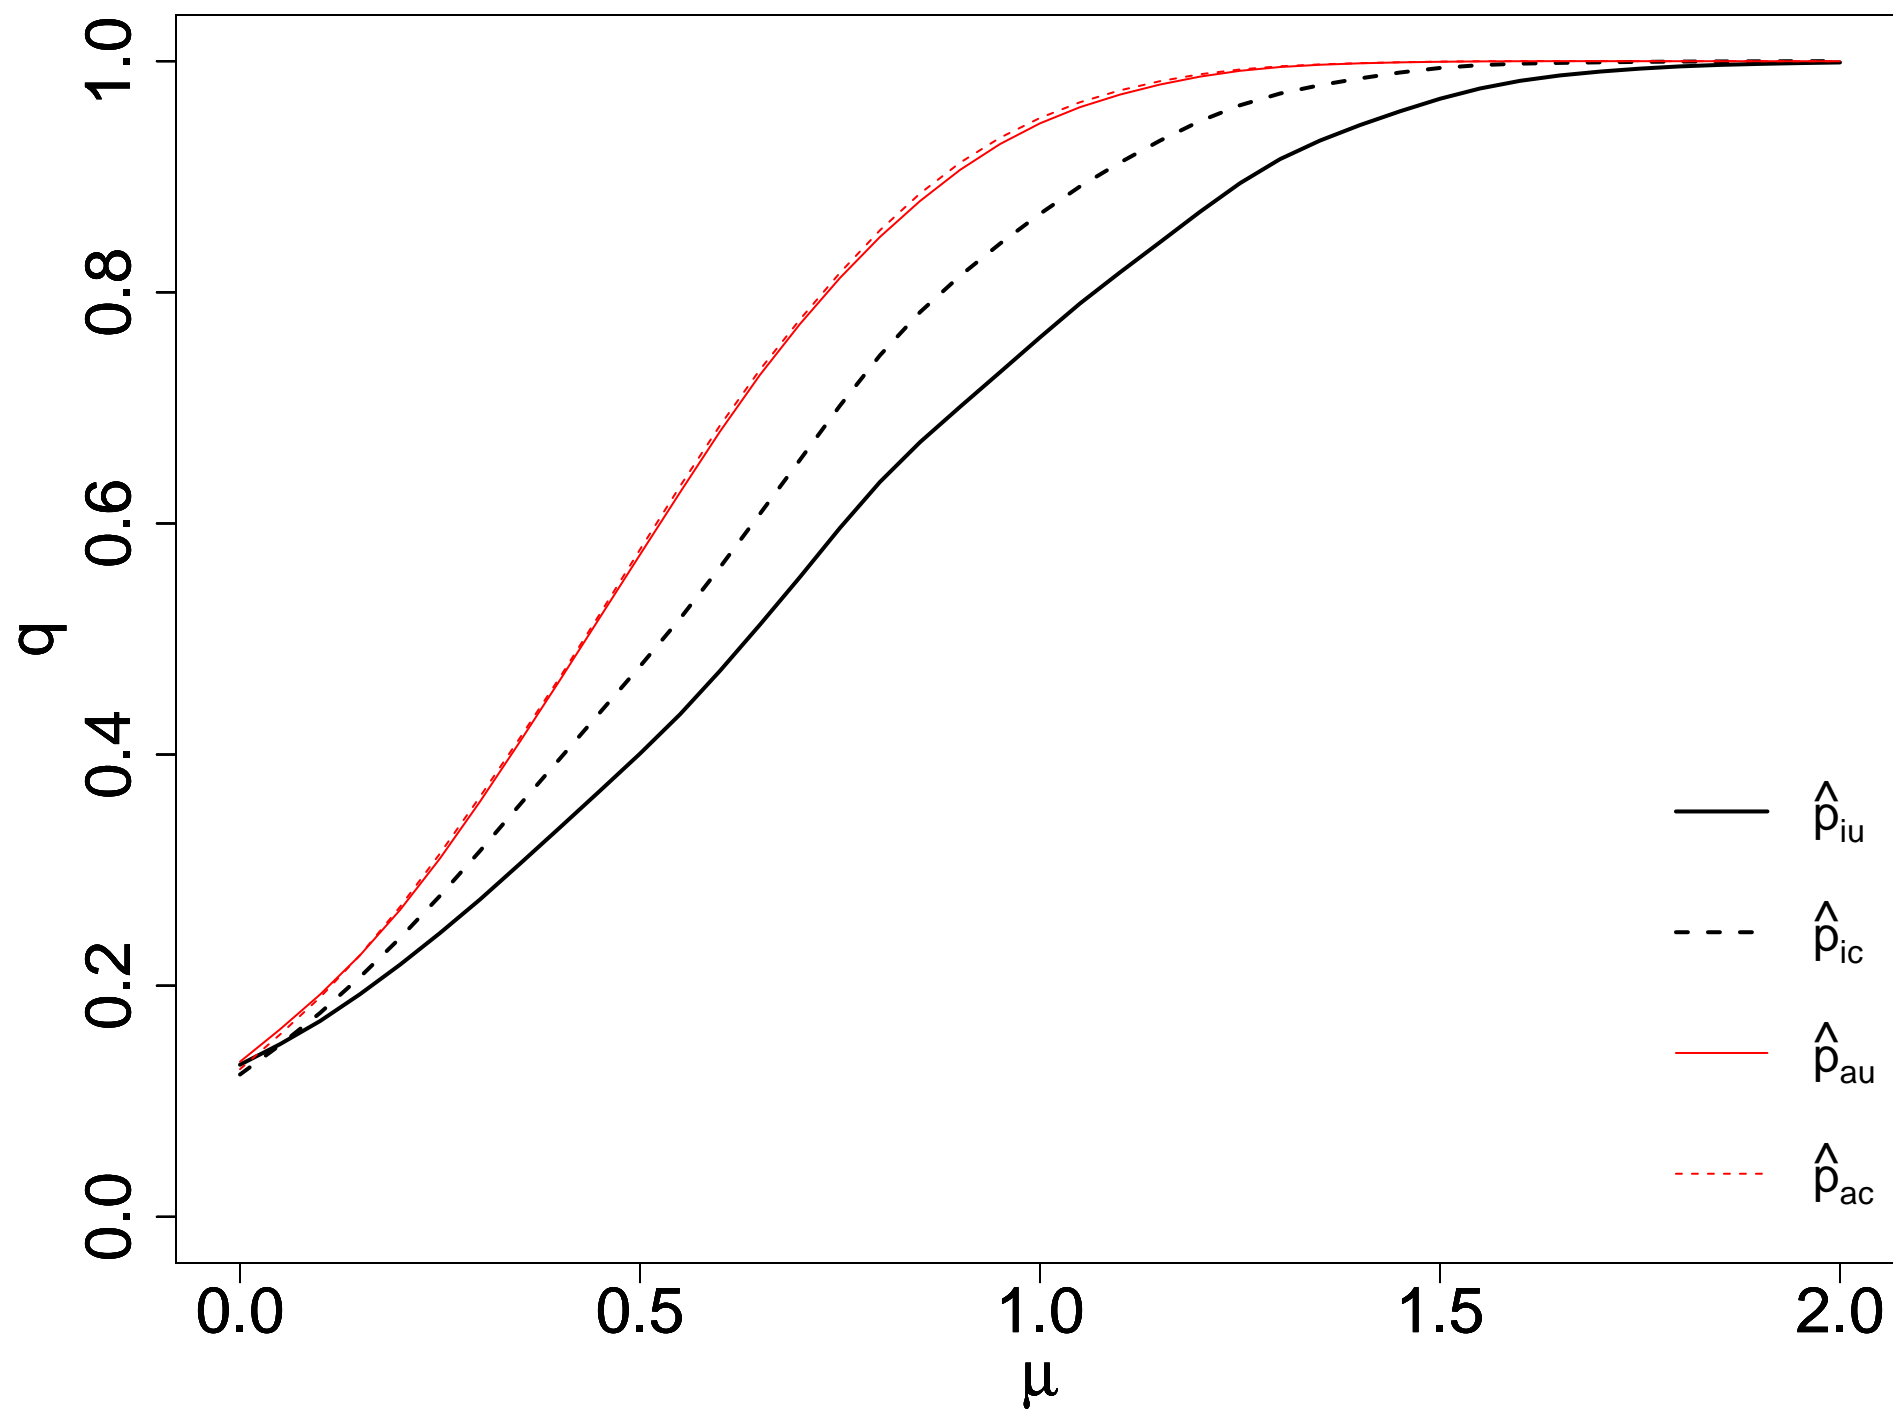

Supplement: Supplementary file 34 [file 1]

q curves for N=25, FAR=0.01

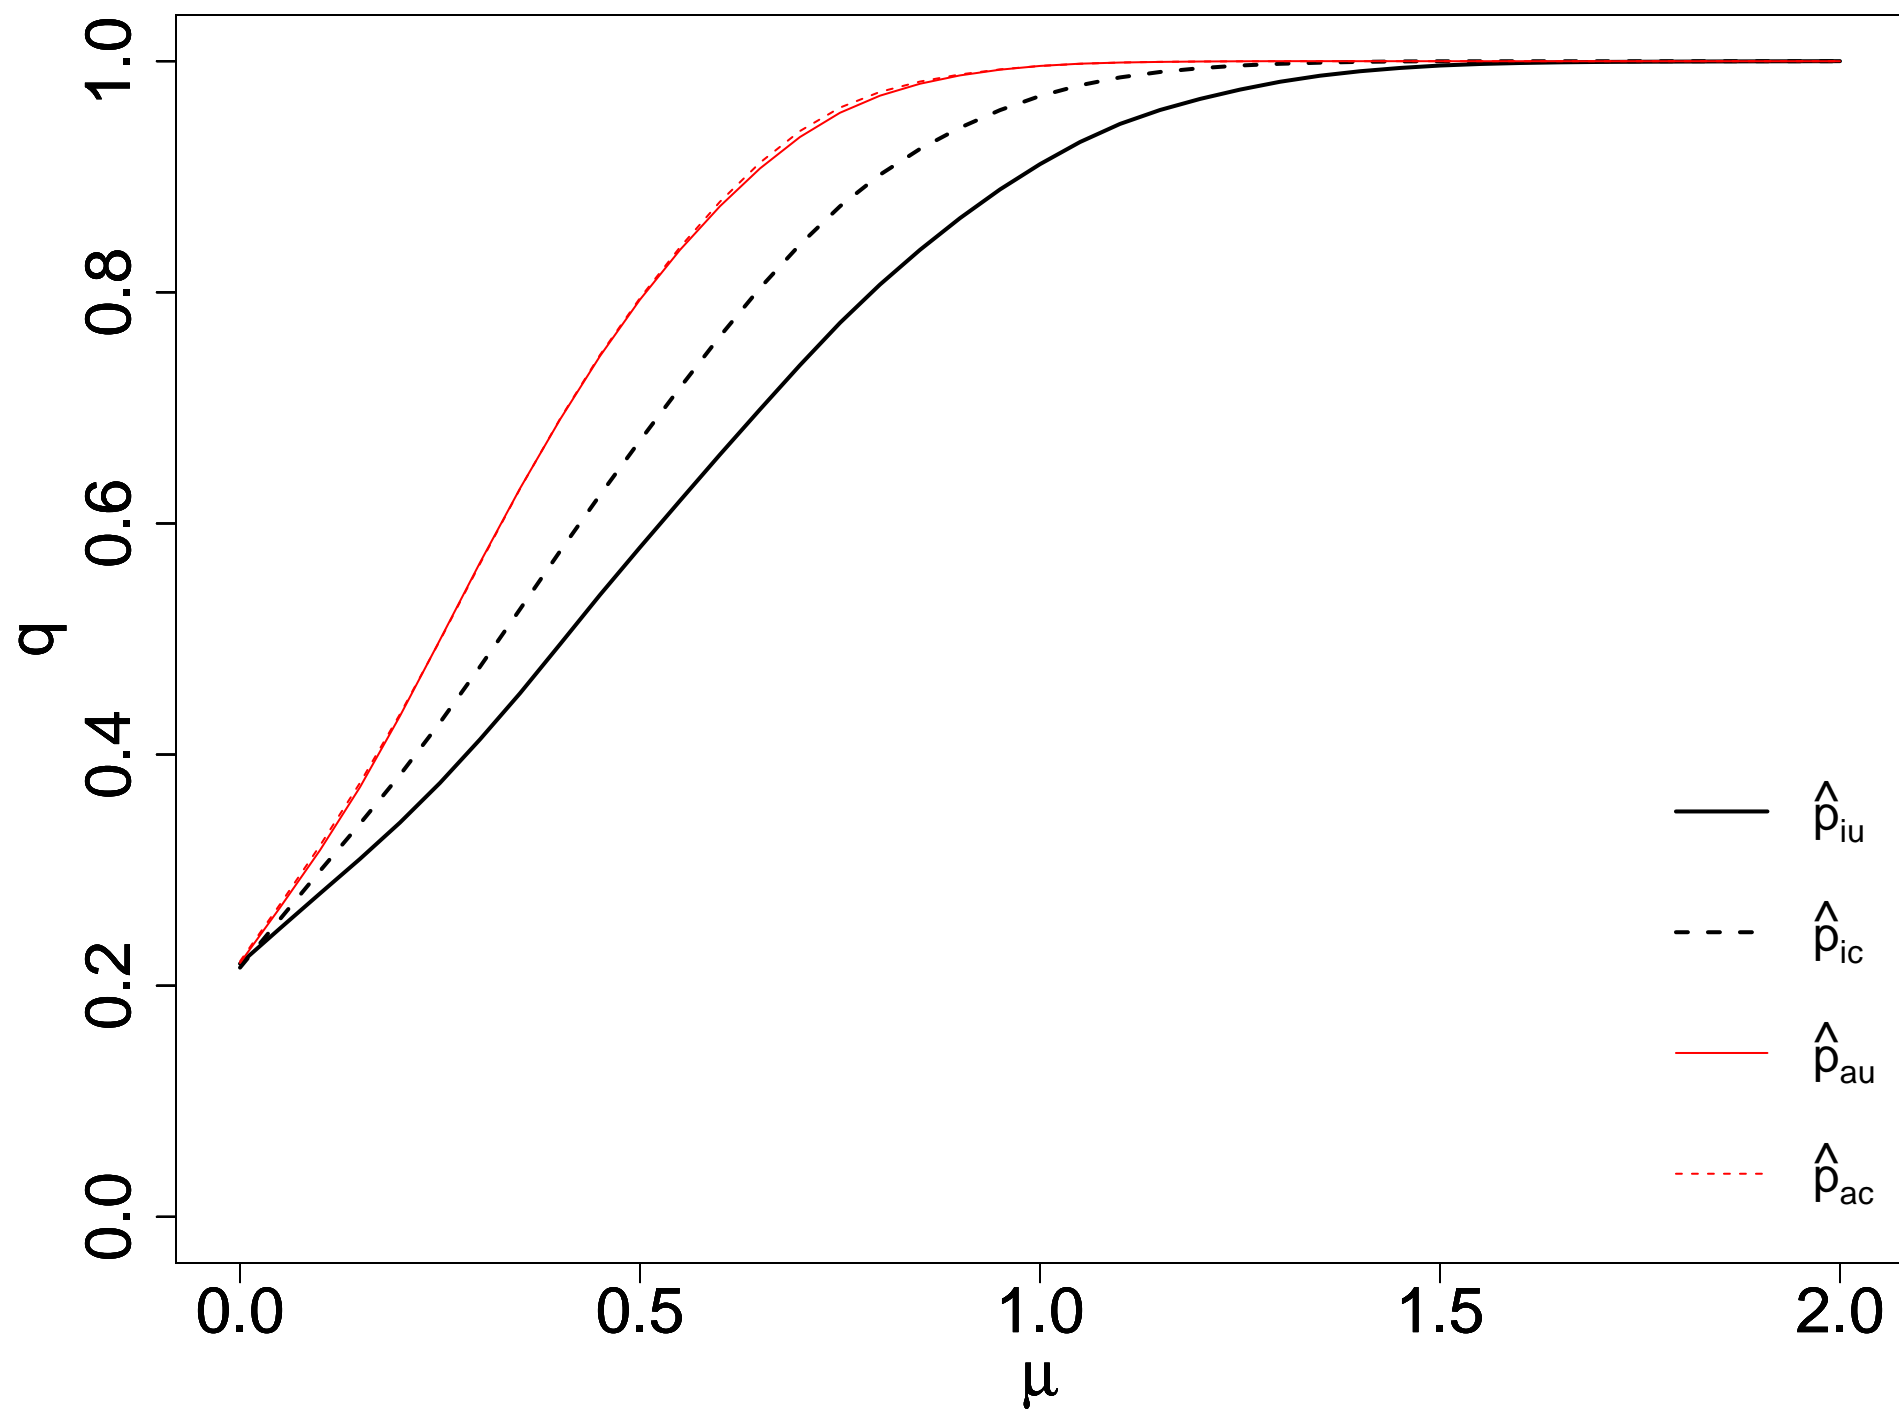

Supplement: Supplementary file 35 [file 1]

q curves for N=30, FAR=0.01

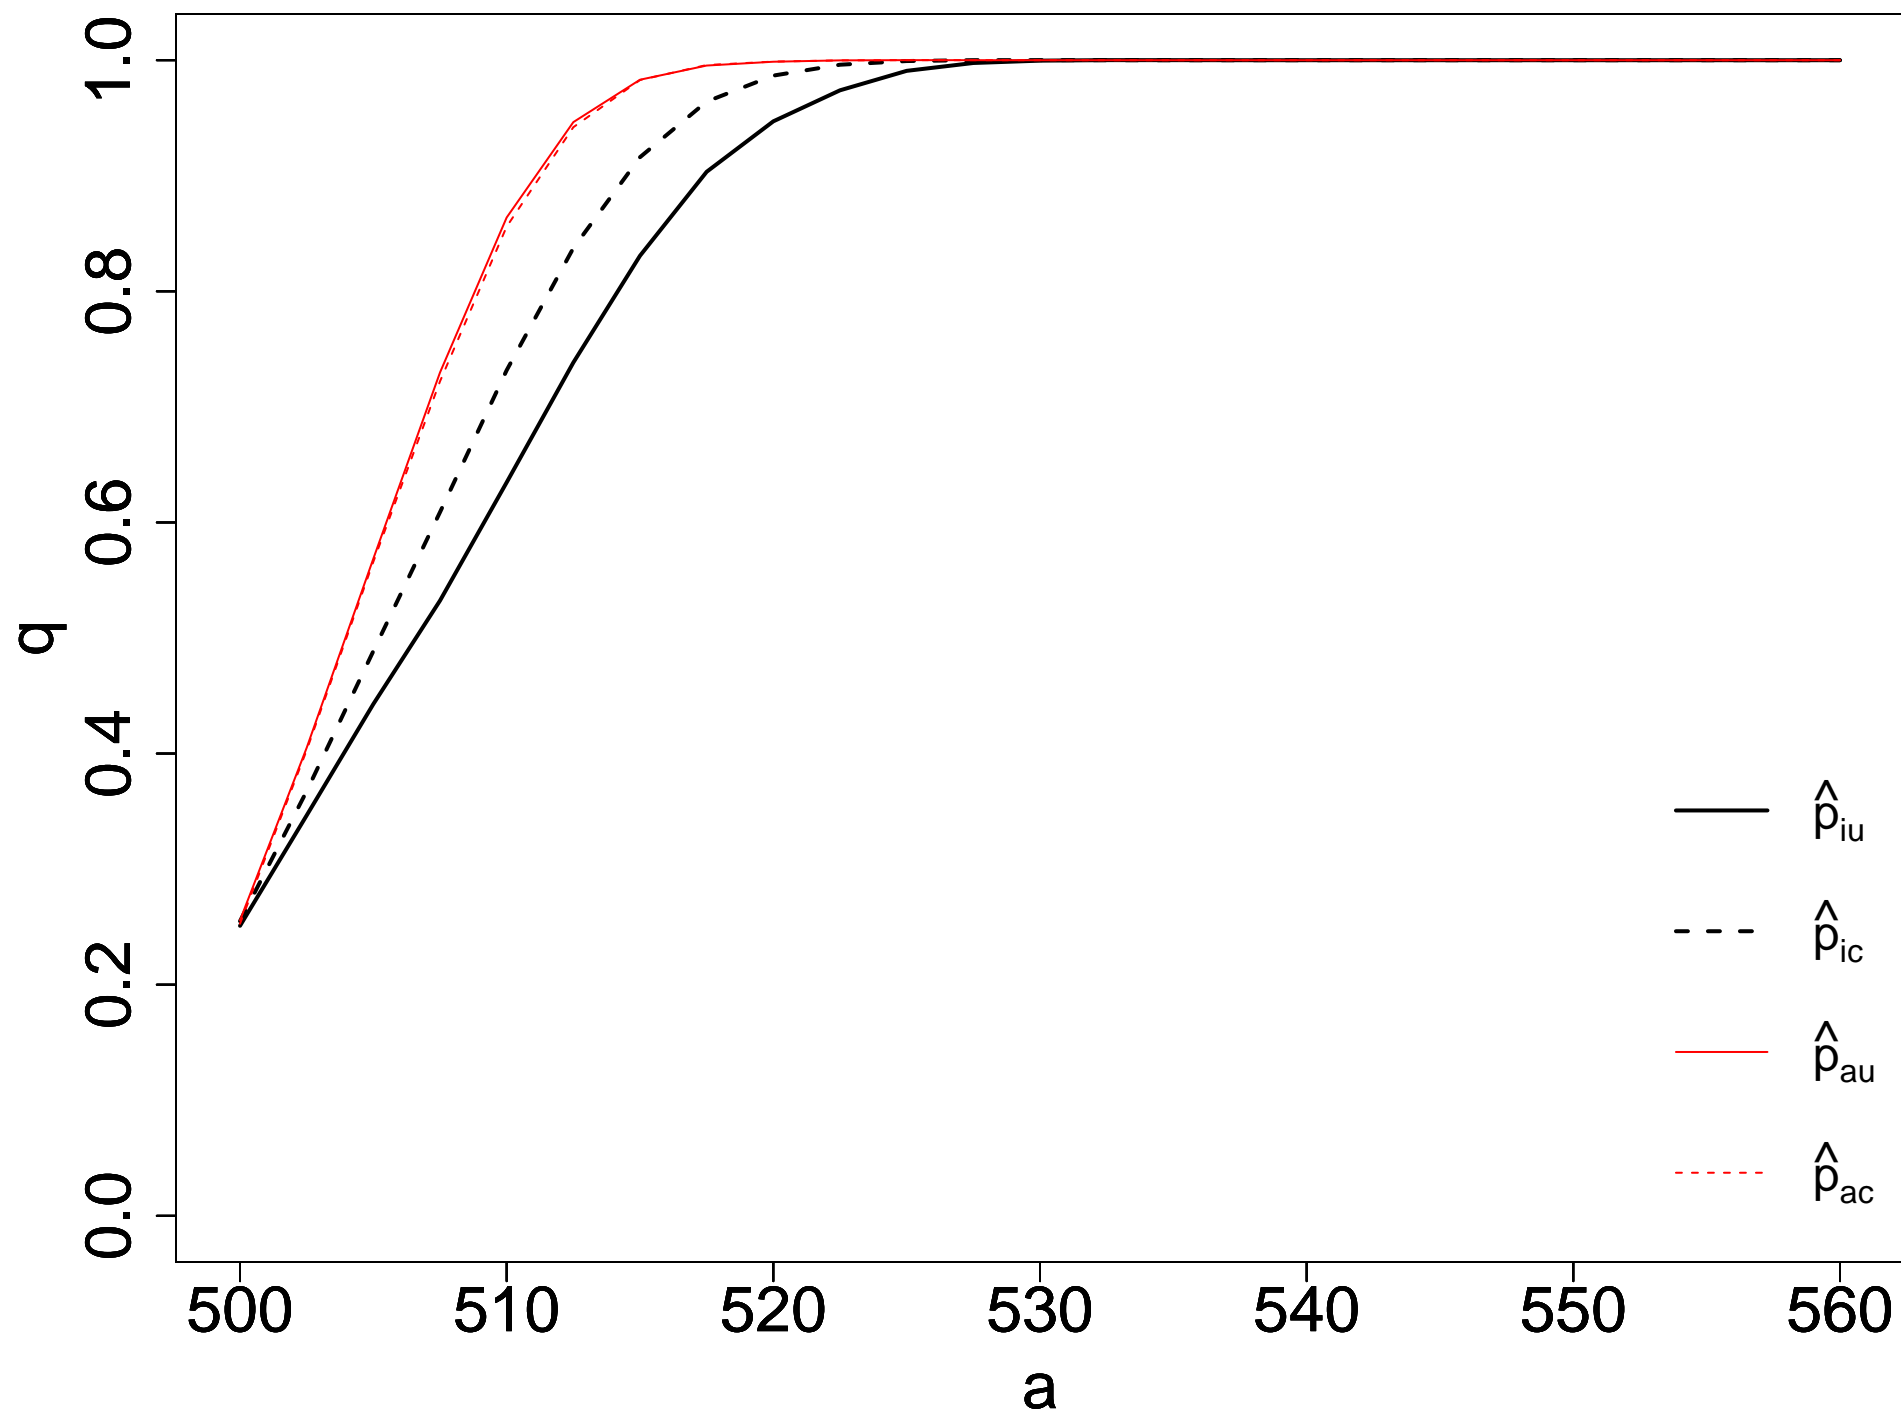

Supplement: Supplementary file 36 [file 1]

TARL curves for N=30, FAR=0.01

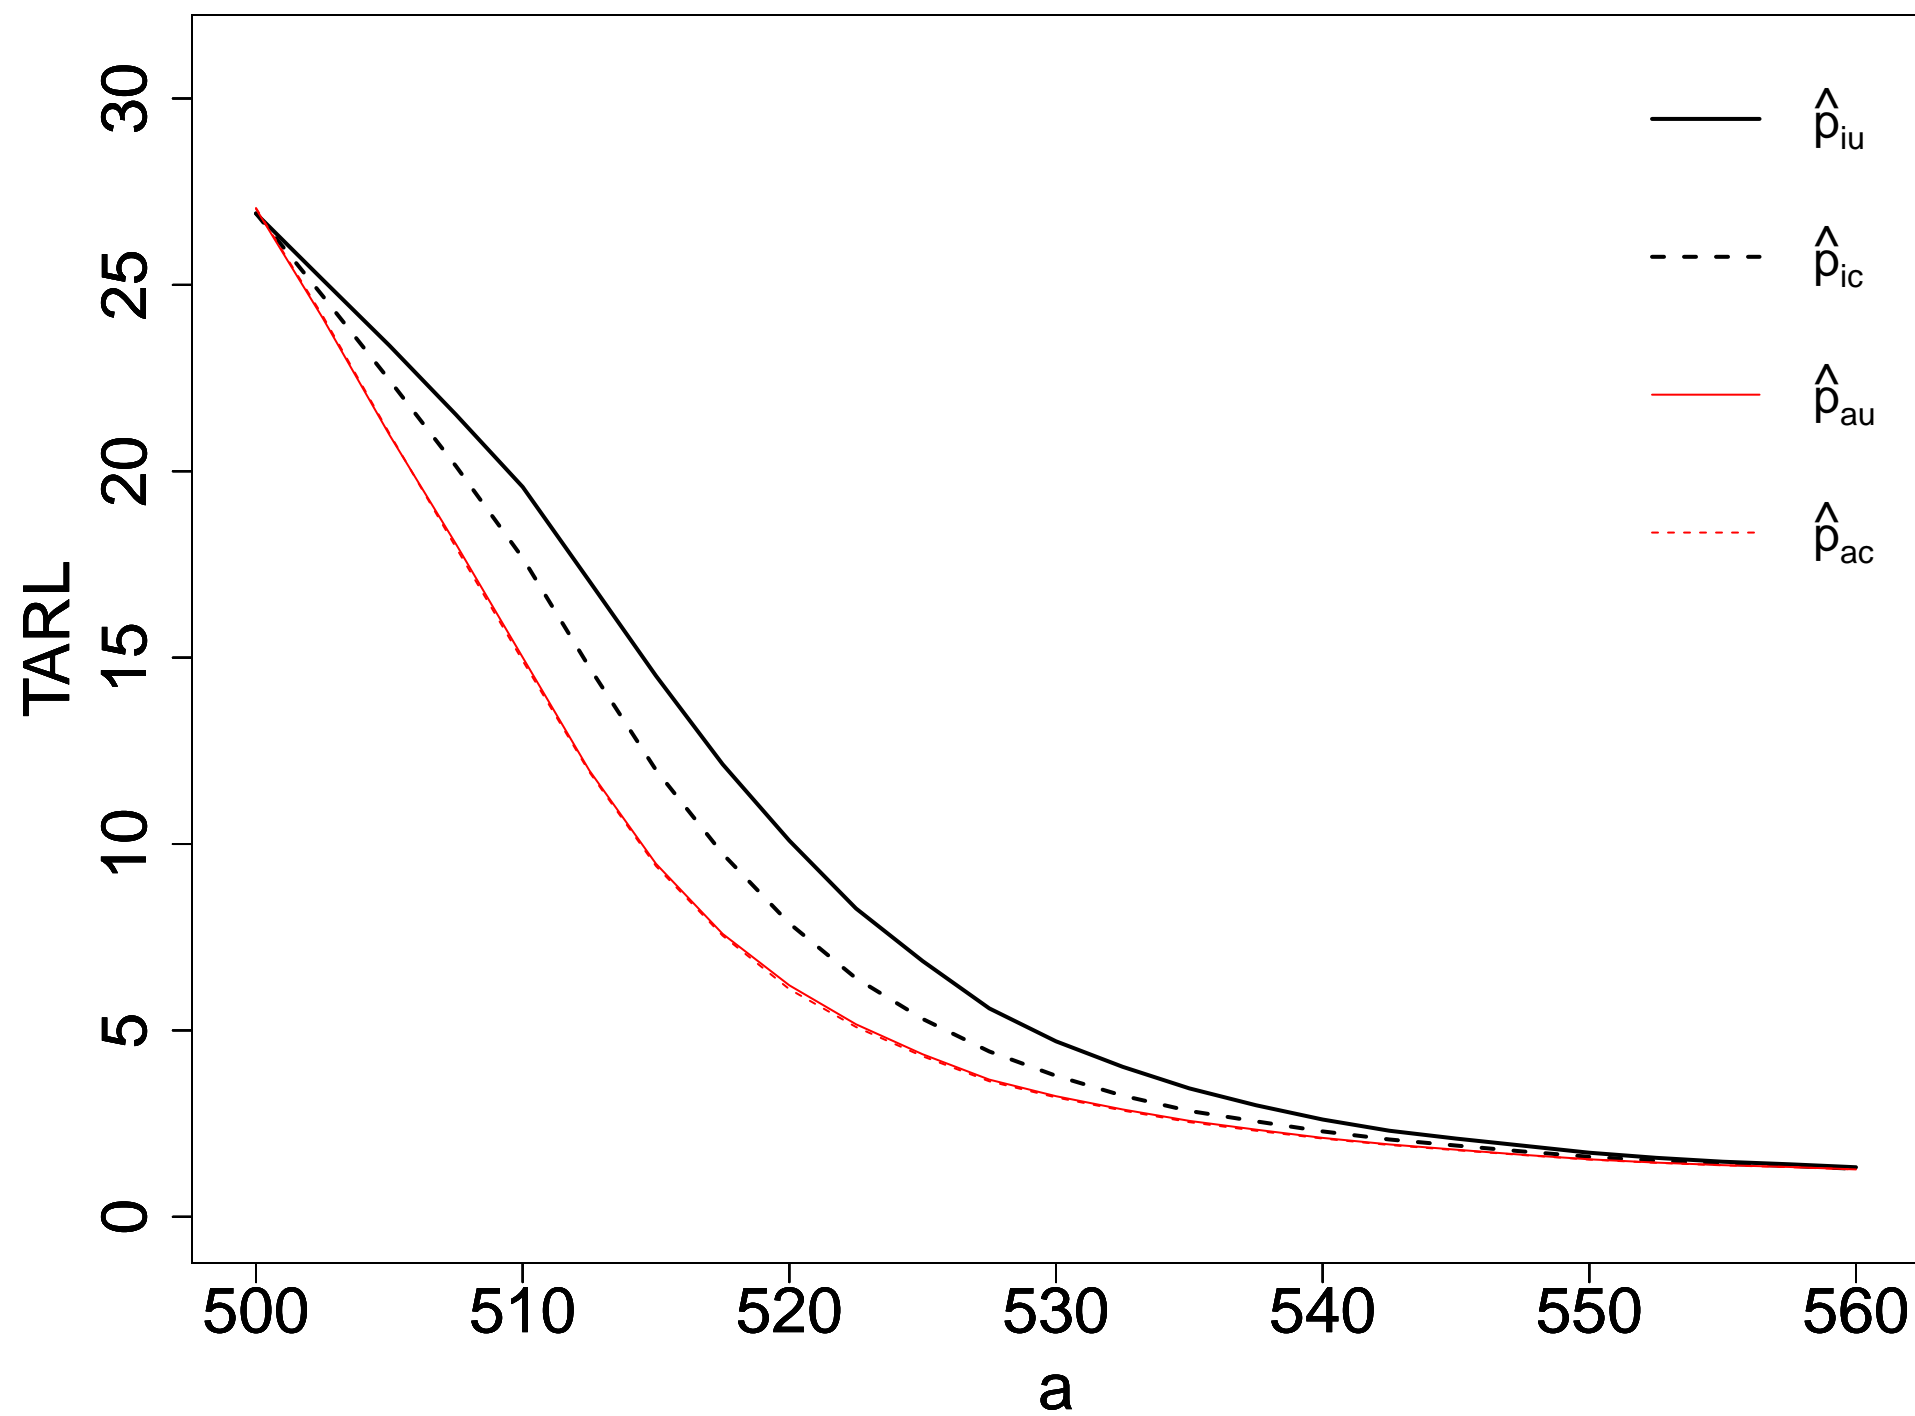

Supplement: Supplementary file 37 [file 1]
